# Supplementary material for: Aminoacid-derived mercaptoimidazoles
Source: Royal Society of Chemistry journal article supplement (doi:10.1039/b810678a), 2008-10-31

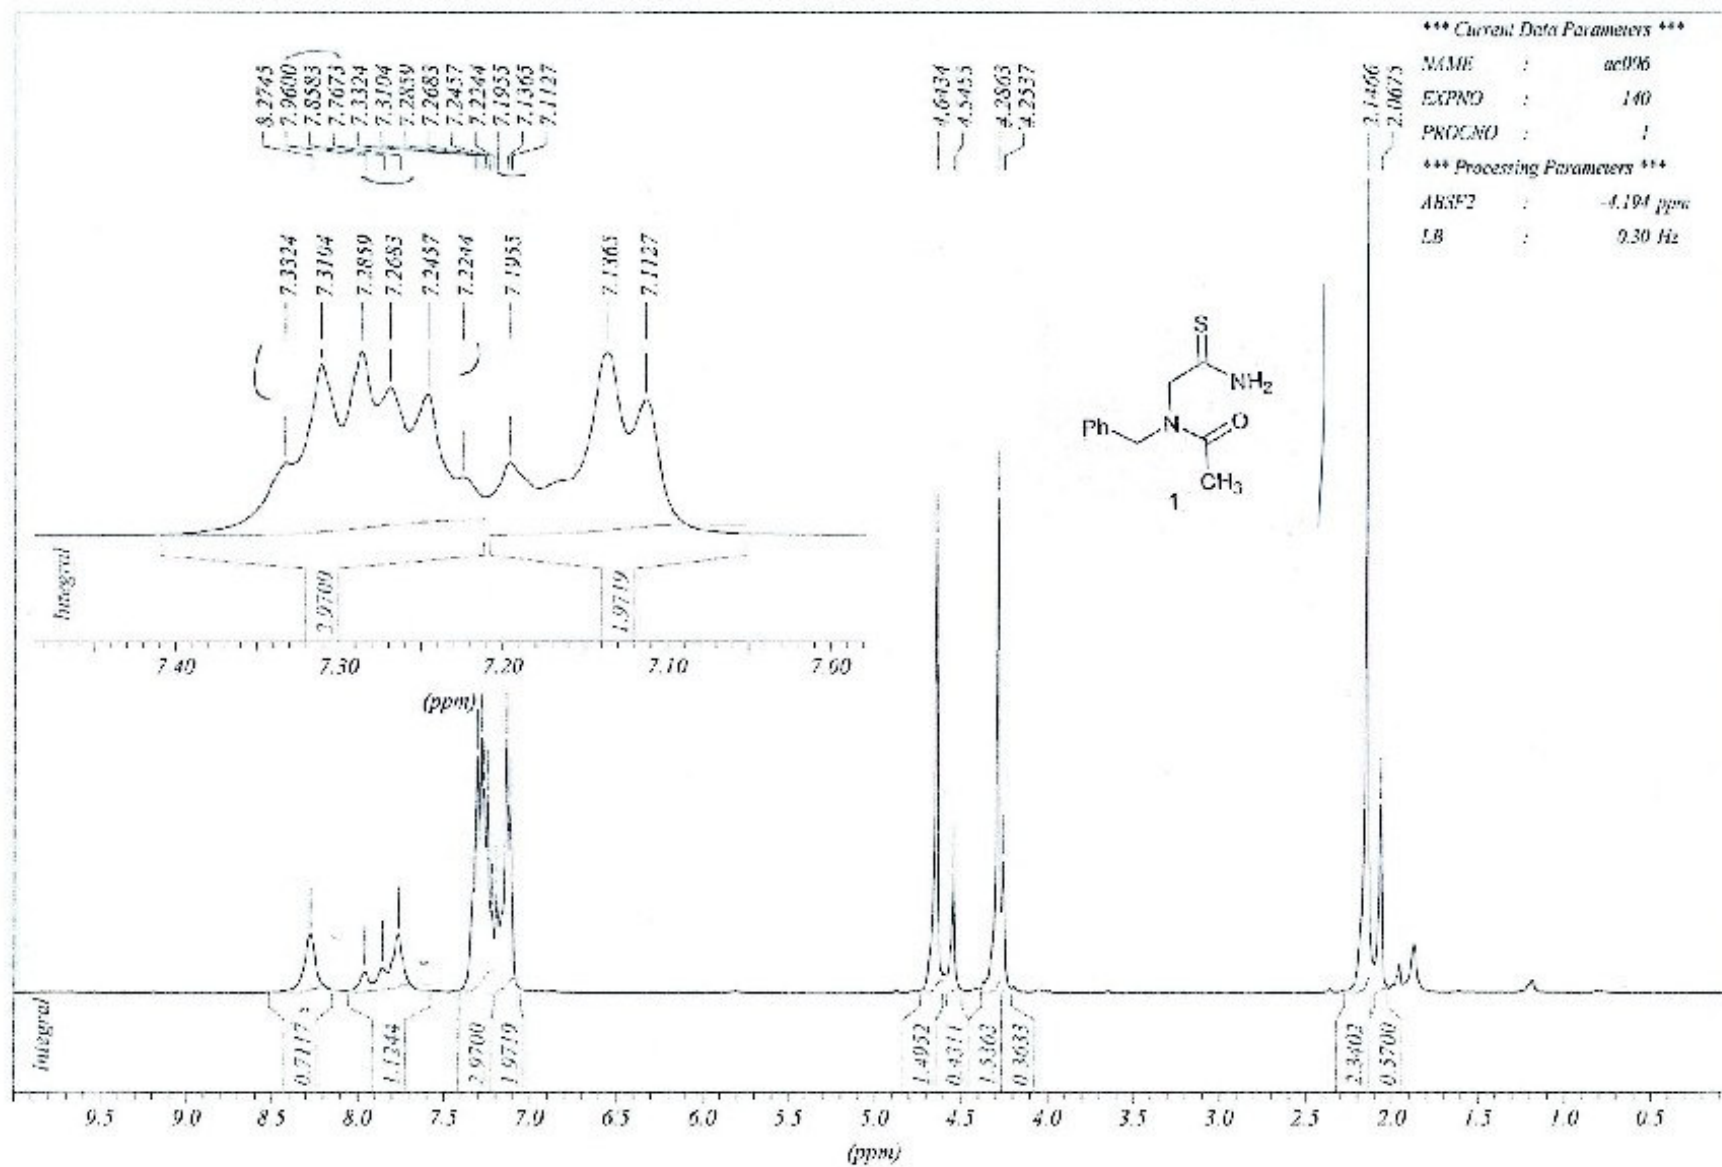

AC006

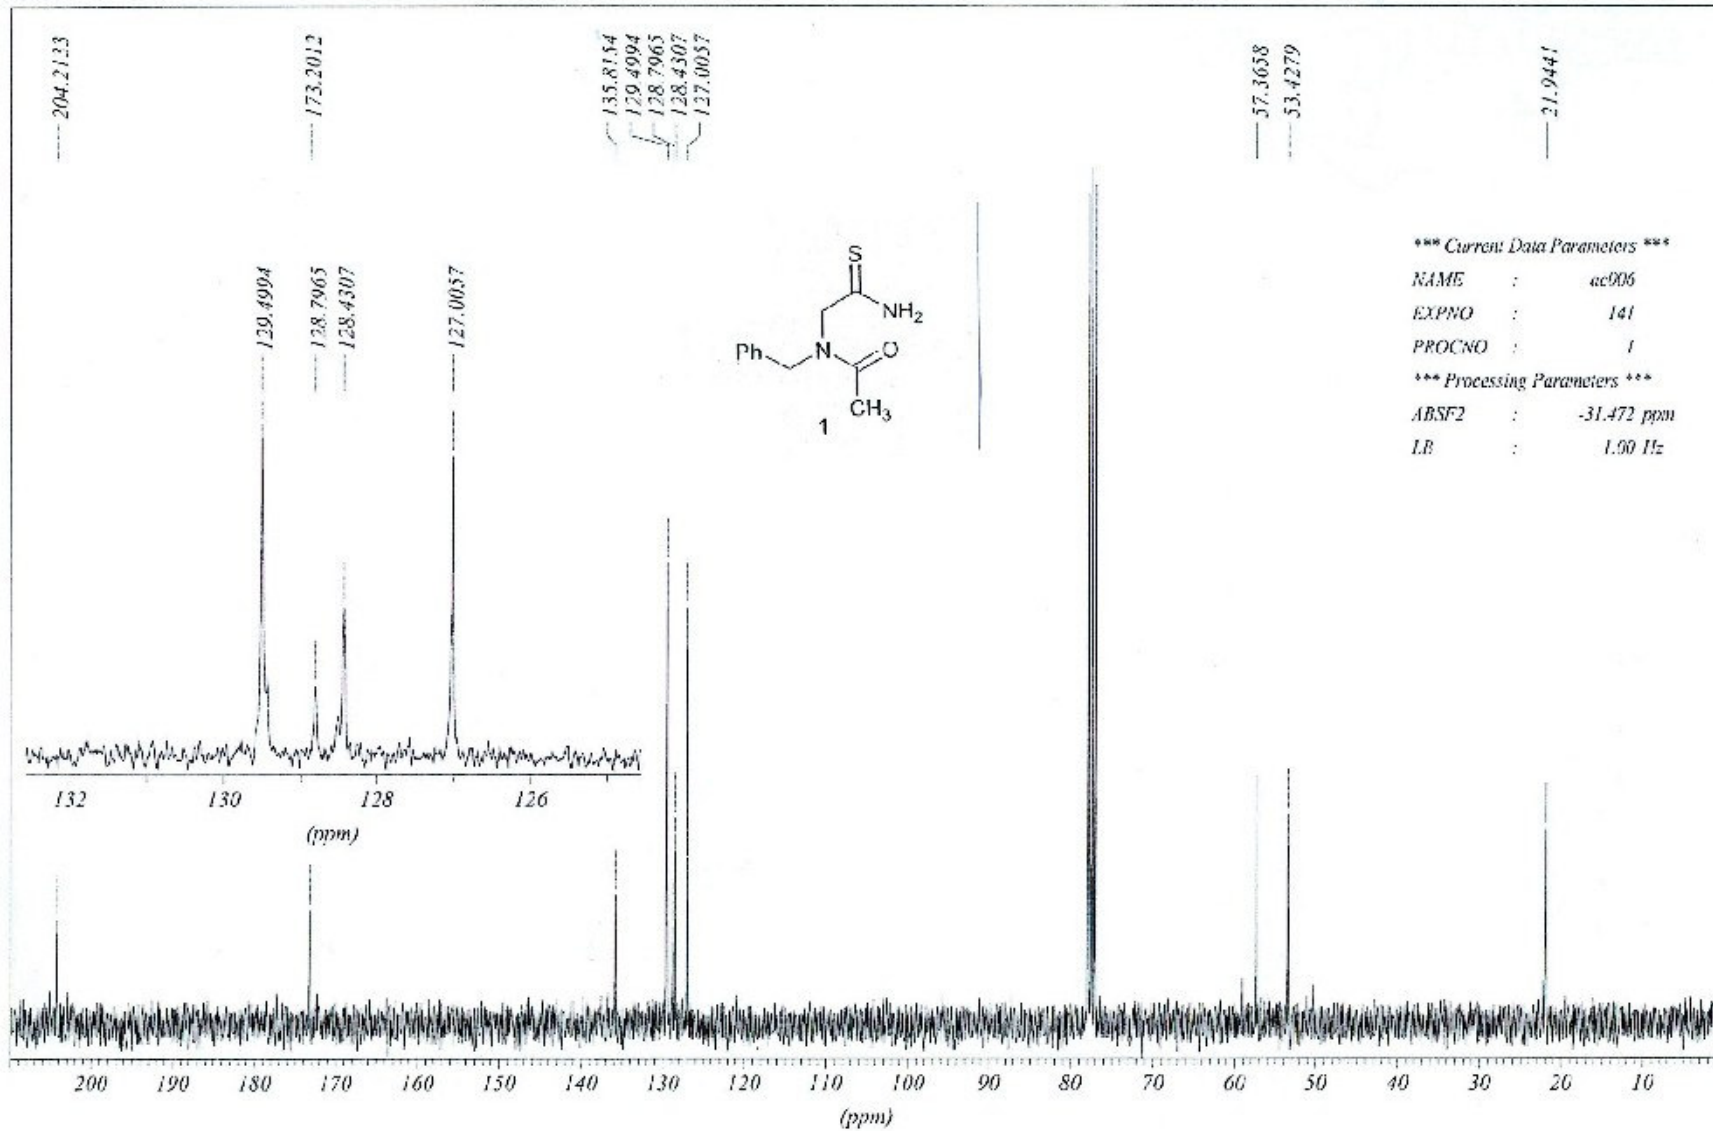

AC66.A (60mg/ml de CDCl<sub>3</sub>)

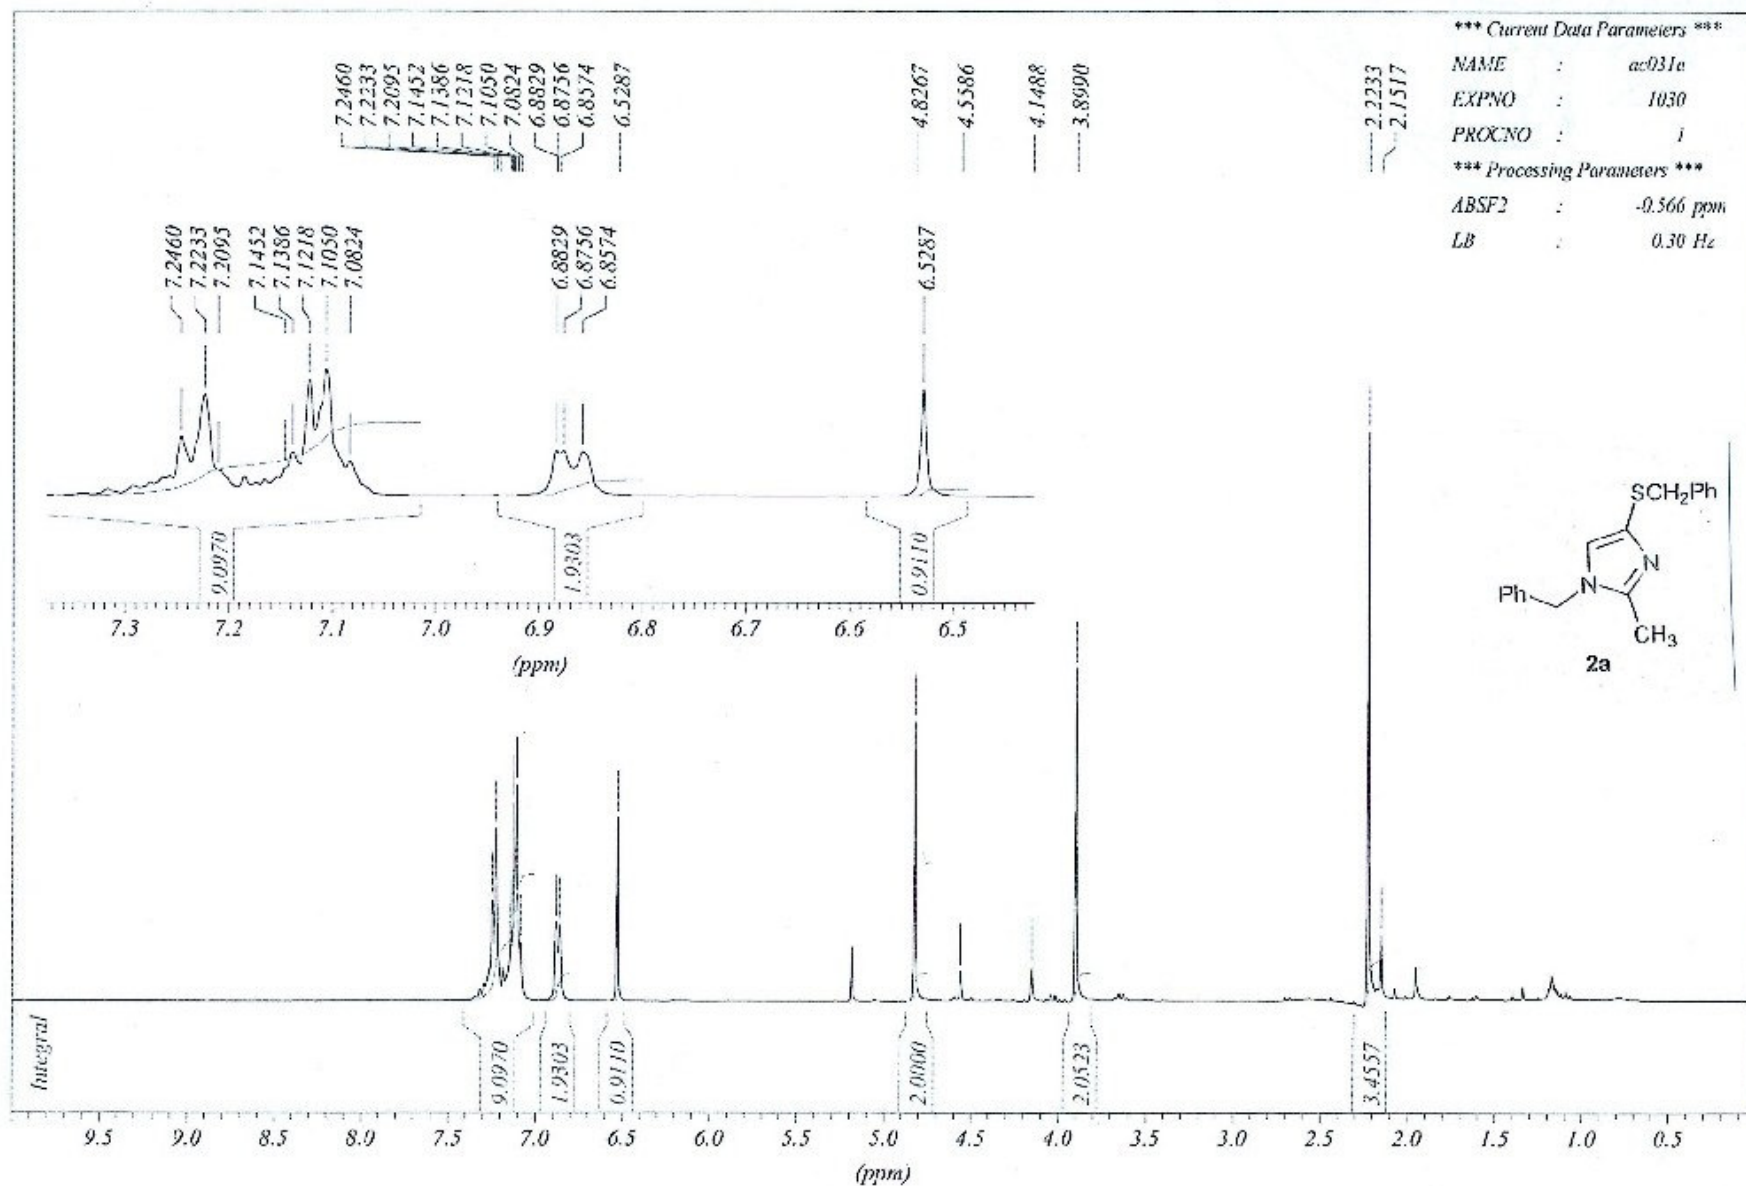

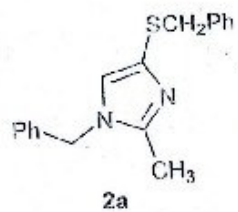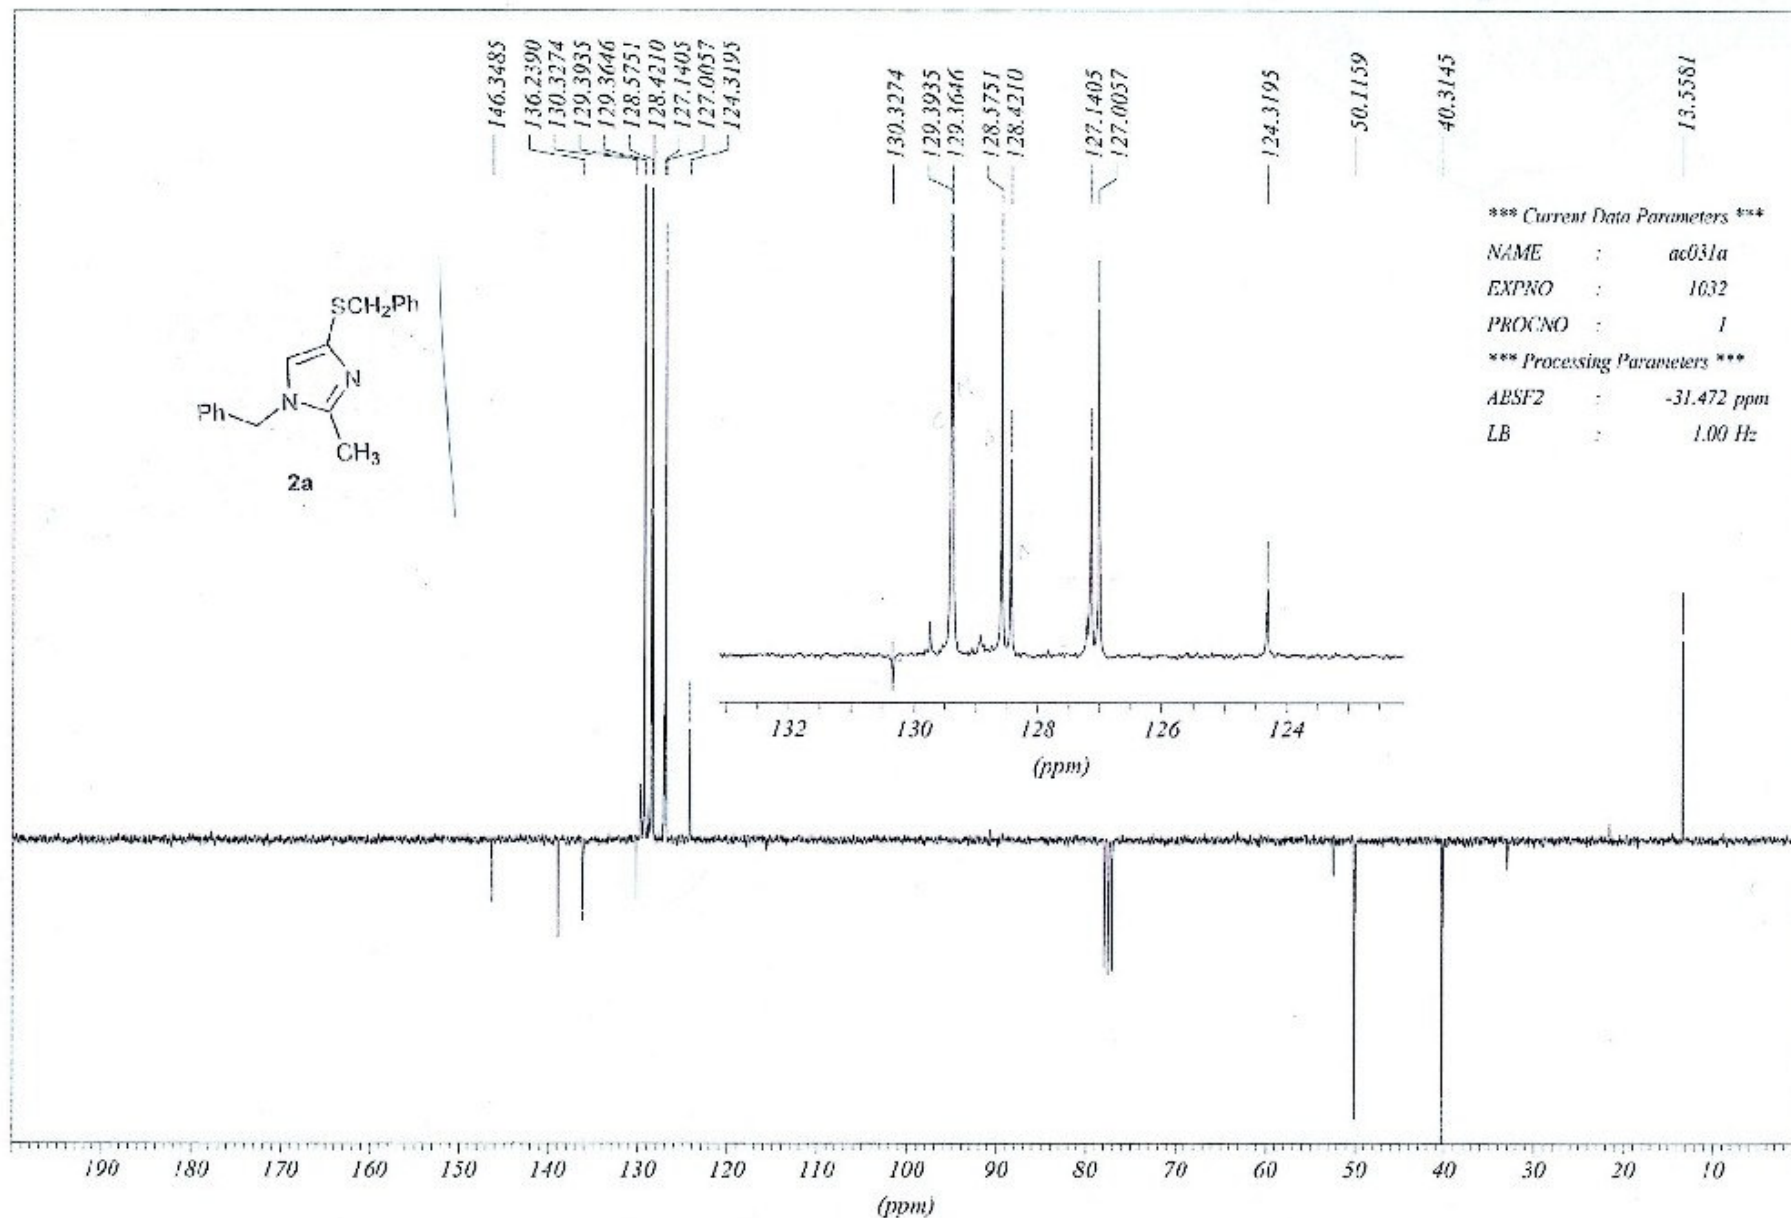

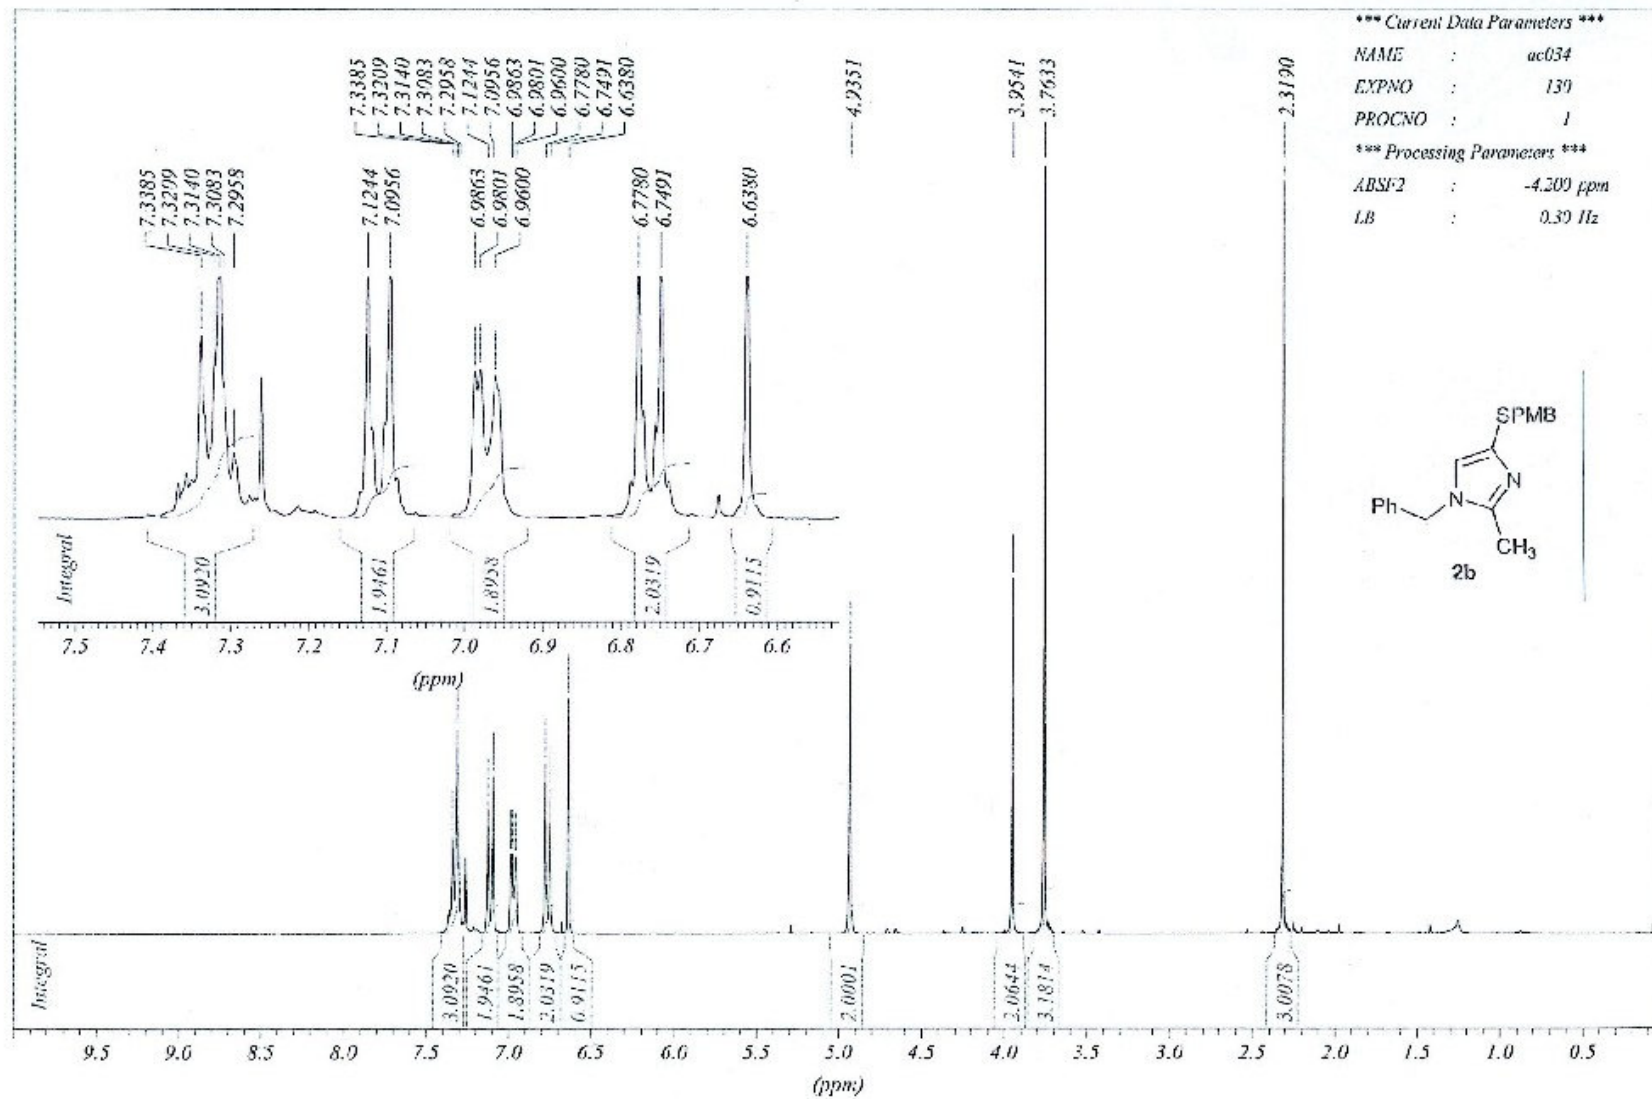

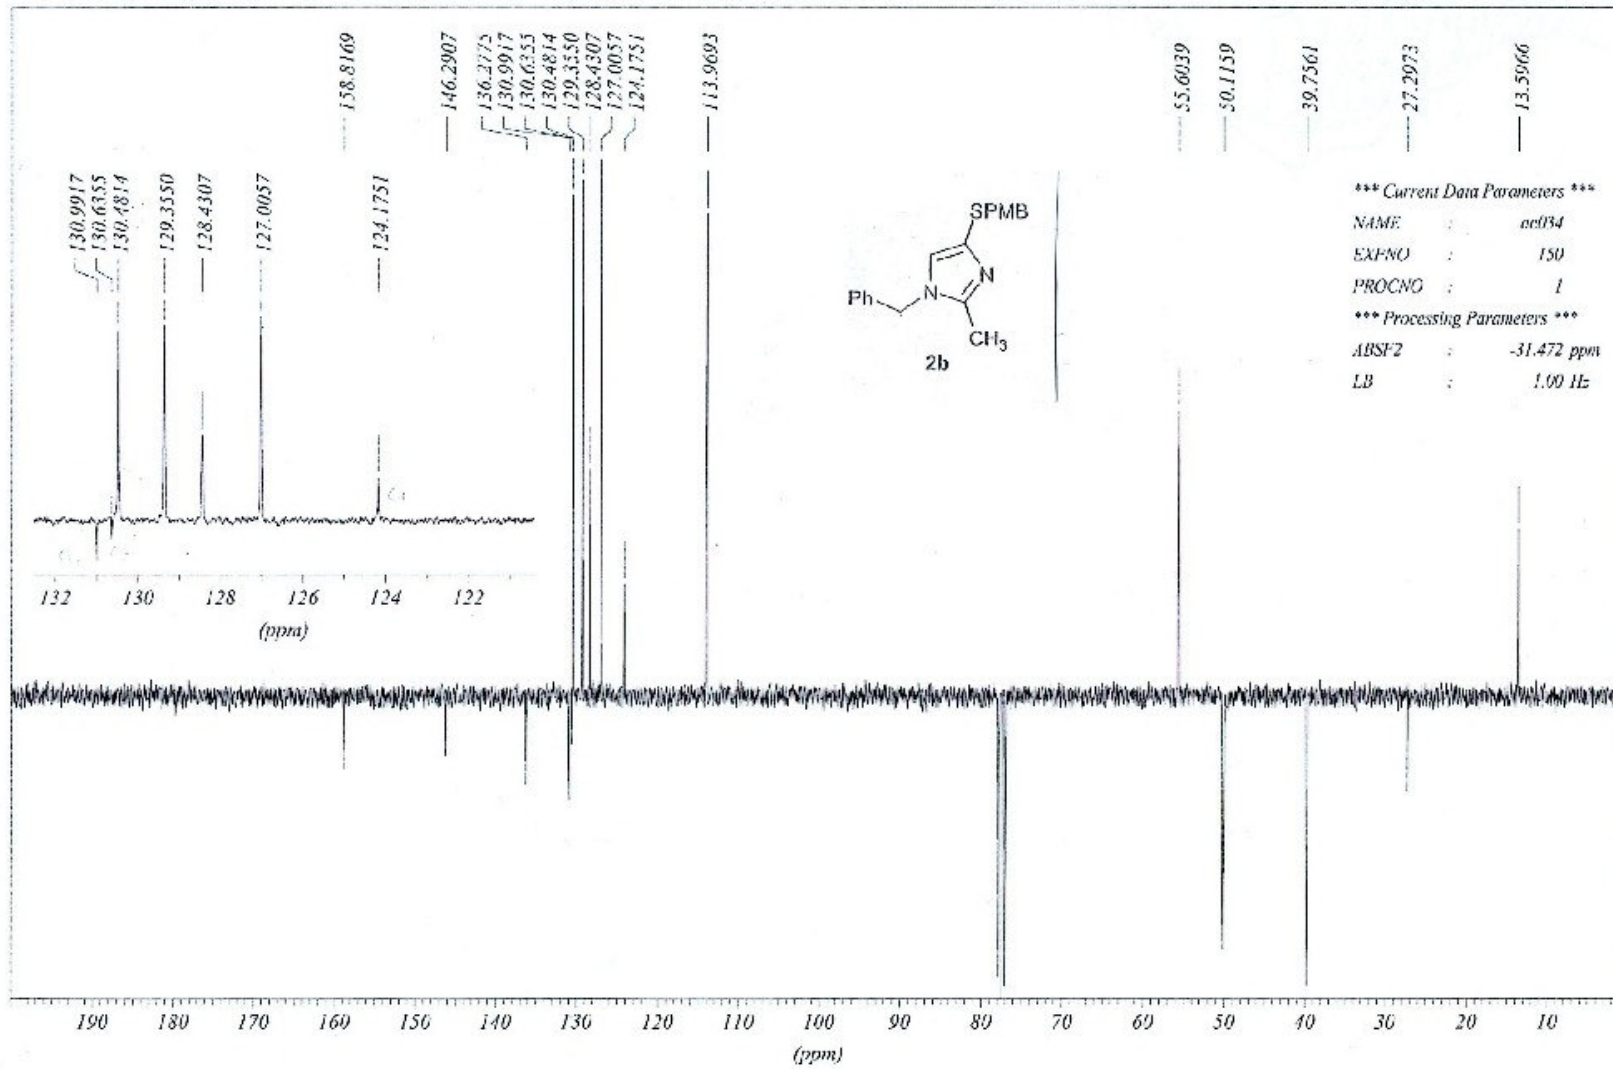

JK721

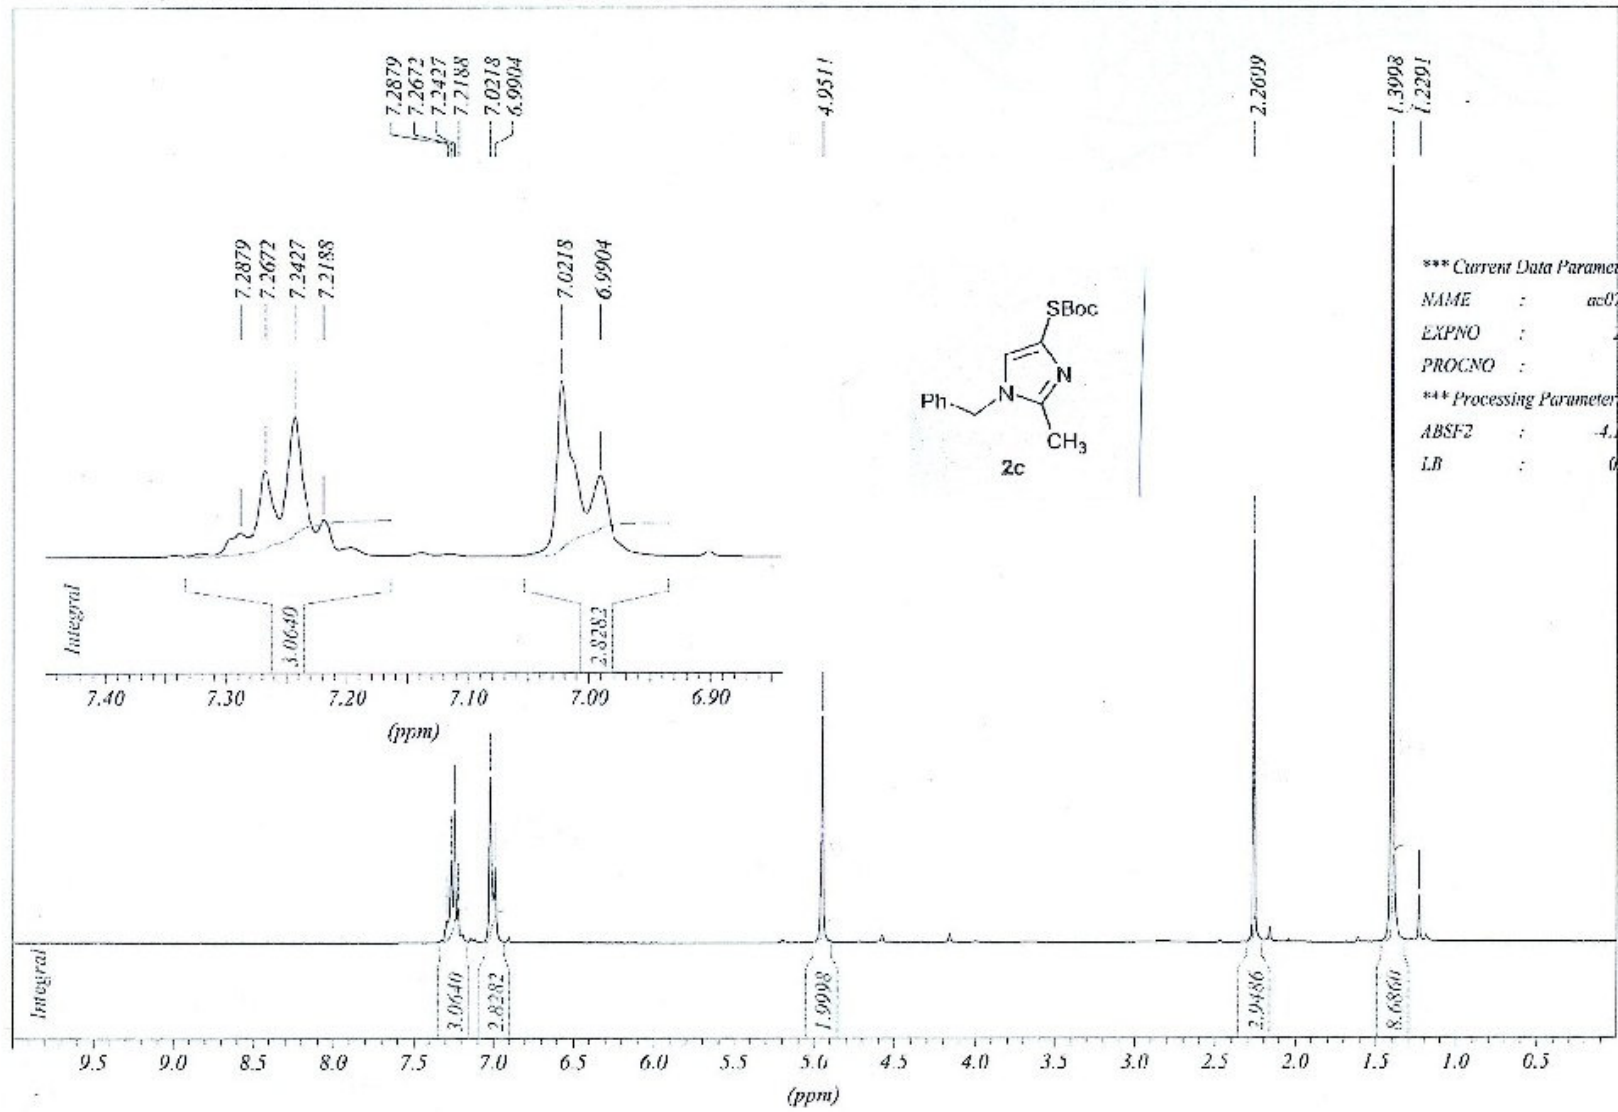

\*\*\* Current Data Parameters \*\*\*  
NAME : ac072a  
EXPNO : 270  
PROCNO : 1  
\*\*\* Processing Parameters \*\*\*  
ABSF2 : -4.177 ppm  
LB : 0.30 Hz

ac72a

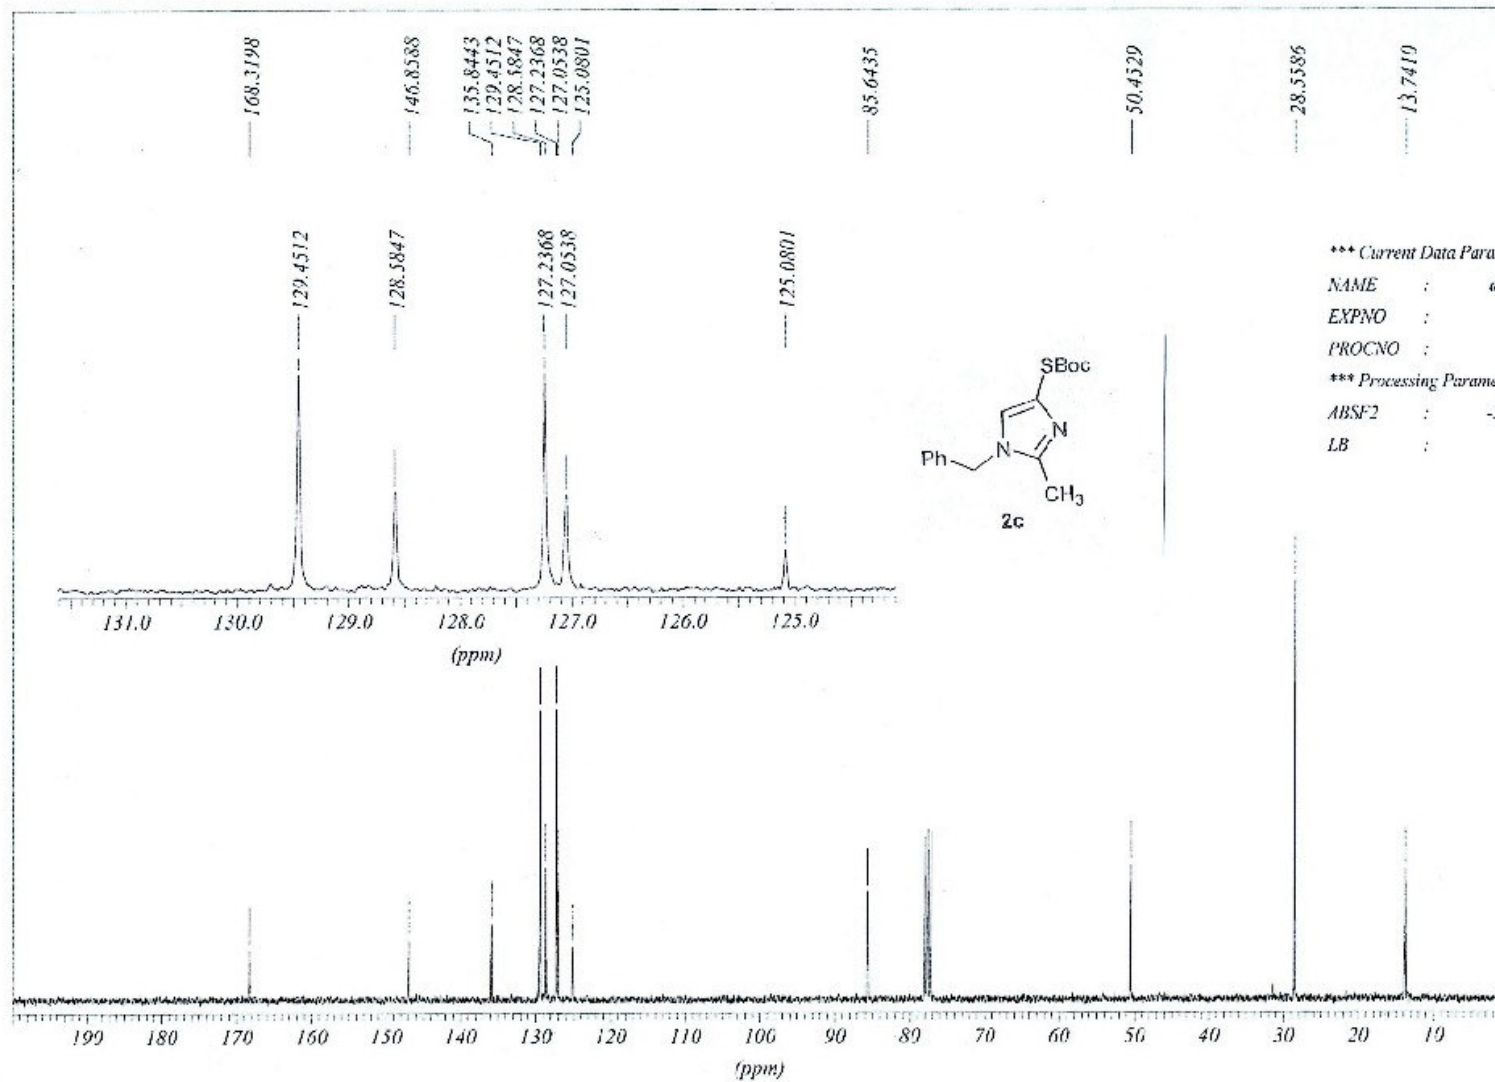





AC250.

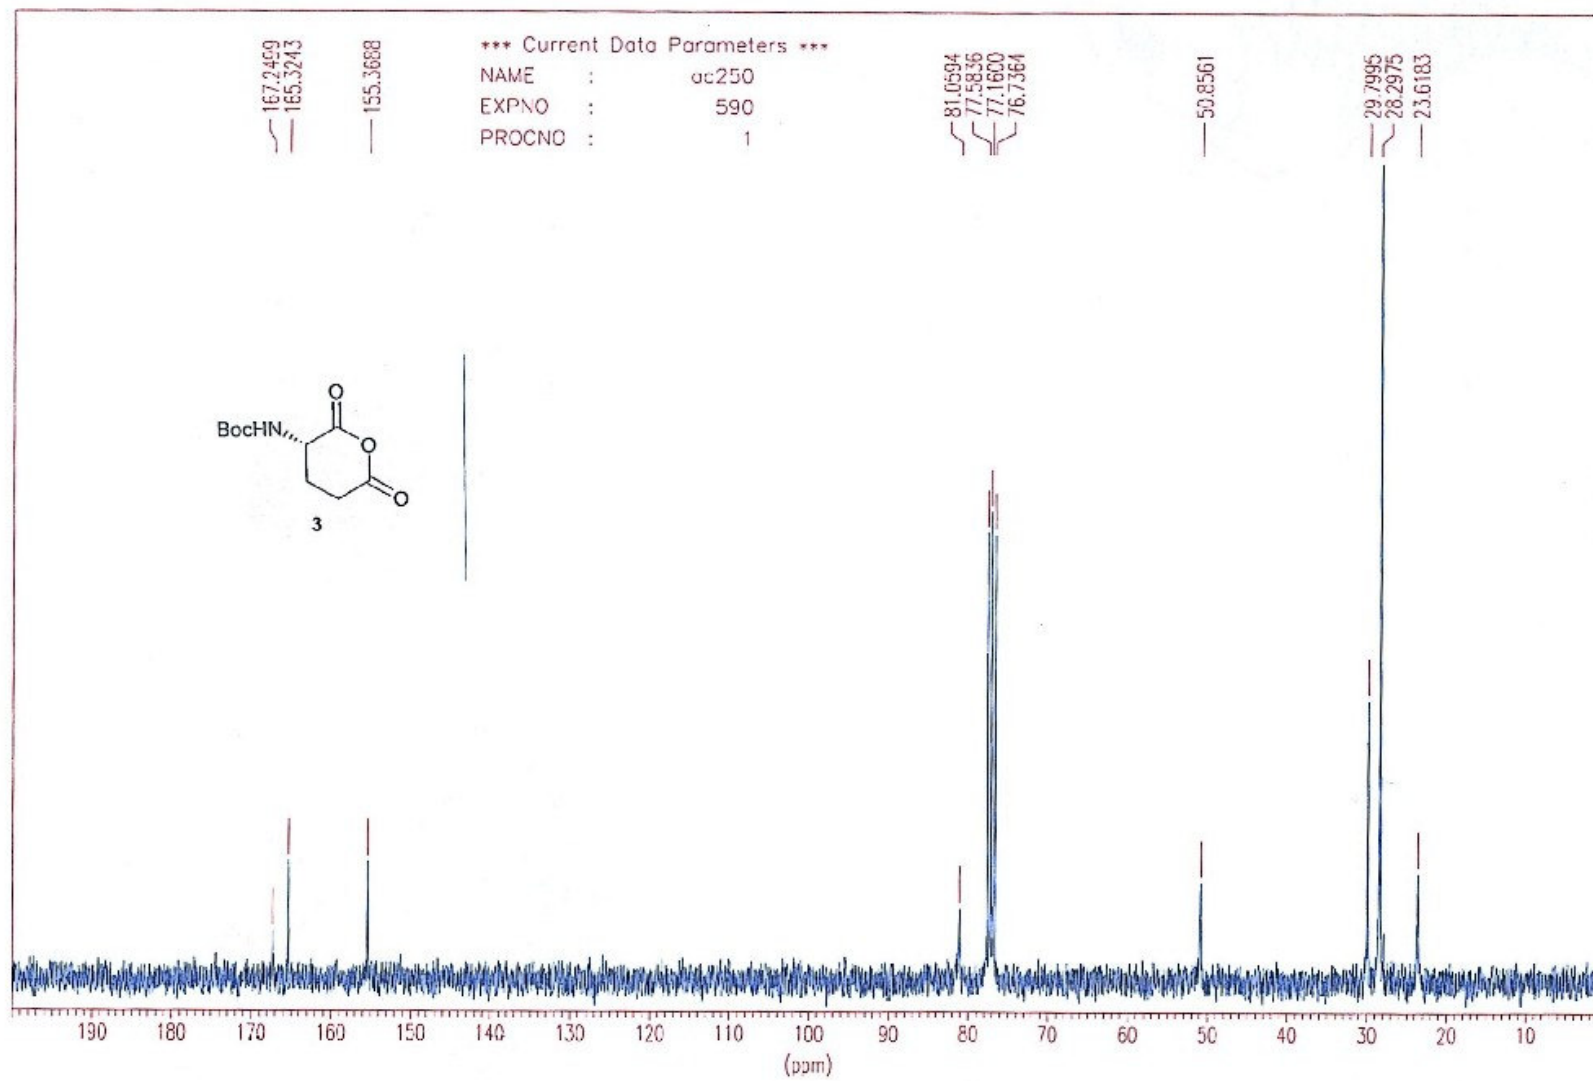

\*\*\* Current Data Parameters

NAME : uc271  
 EXPNO : 620  
 PROCNO : 1

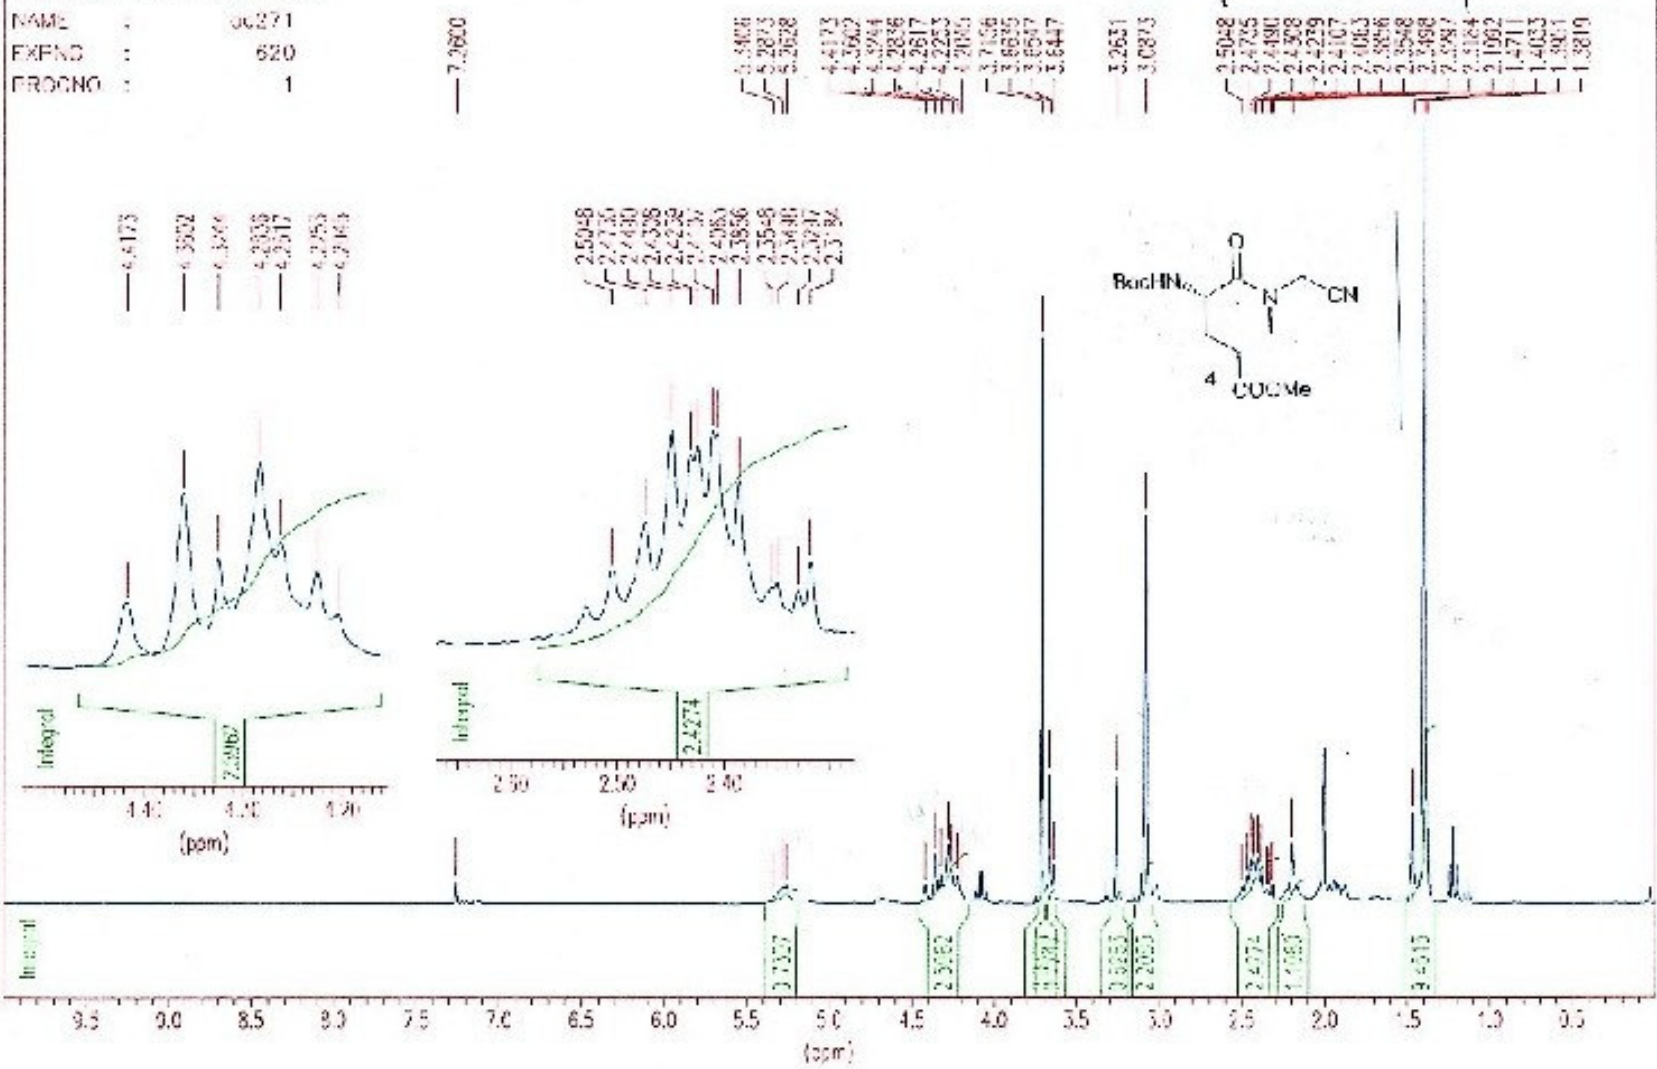

AC271

173.2326  
172.8650  
172.8350  
172.8301

155.8288

115.3548

76.7373  
76.5611  
77.1609  
76.7364

31.4457  
30.3650  
30.2470  
31.3658  
30.1212

35.7015  
35.7453  
35.2105  
29.1574  
27.5764  
27.8835  
27.3513  
27.1190  
19.2405

173.3926  
172.8007  
172.5584  
172.2651

52.9320  
52.5410  
51.8928

49.4312

29.1544  
28.9224  
27.8835  
27.6612

\*\*\* Current Data Parameters \*\*\*  
Name: ac271  
EXPNO: 621  
PROCNO: 1

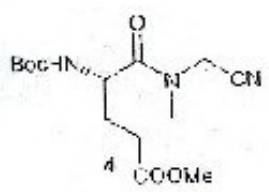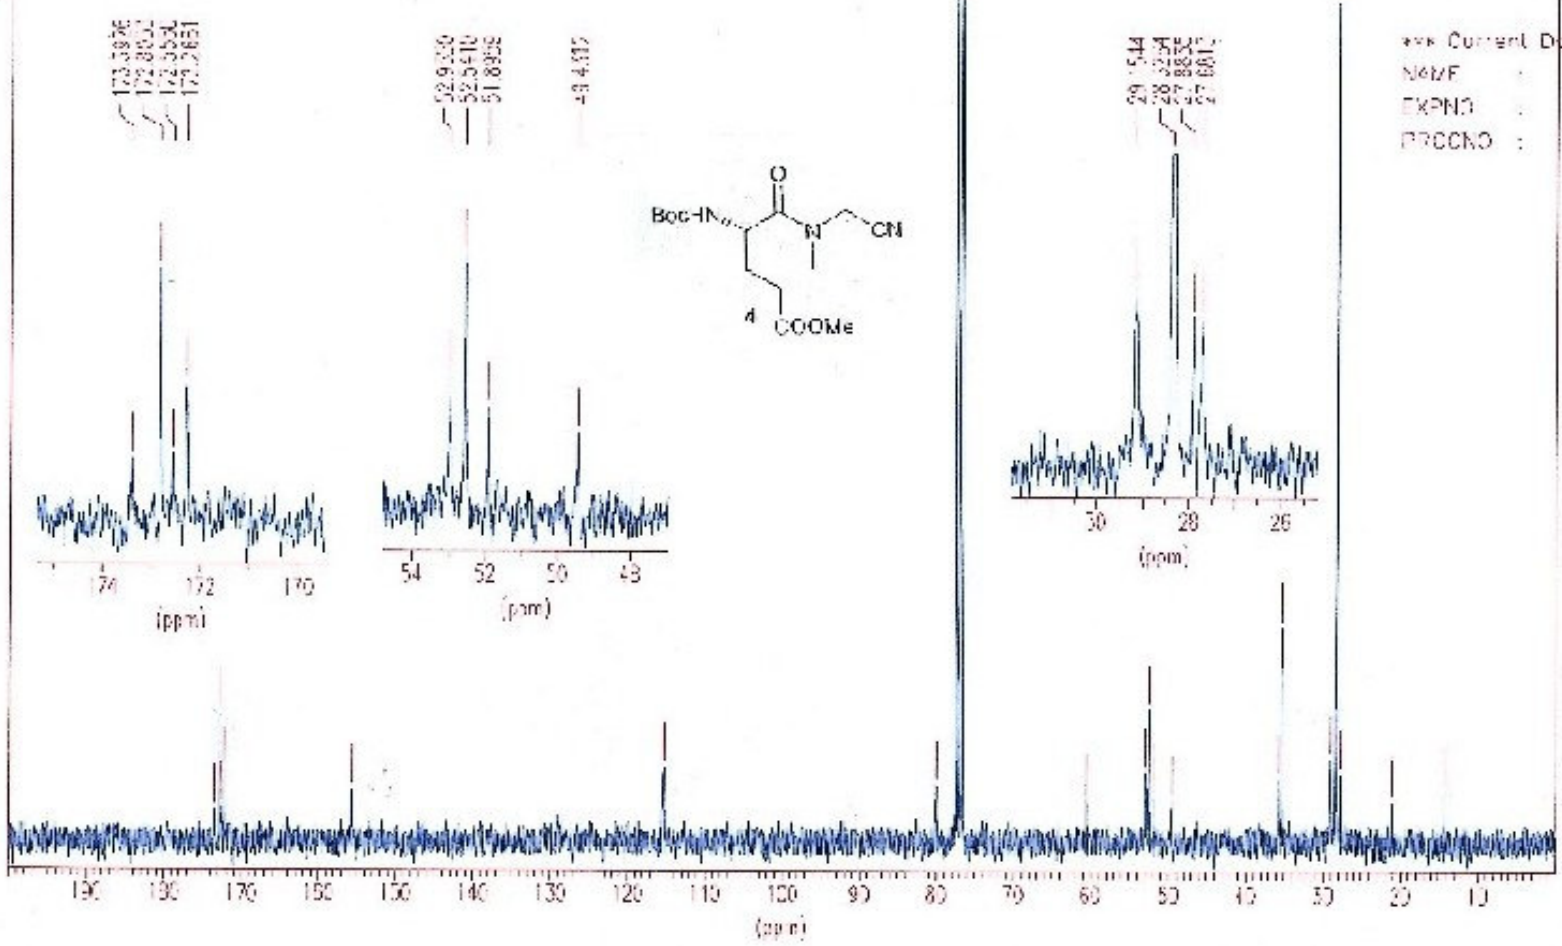

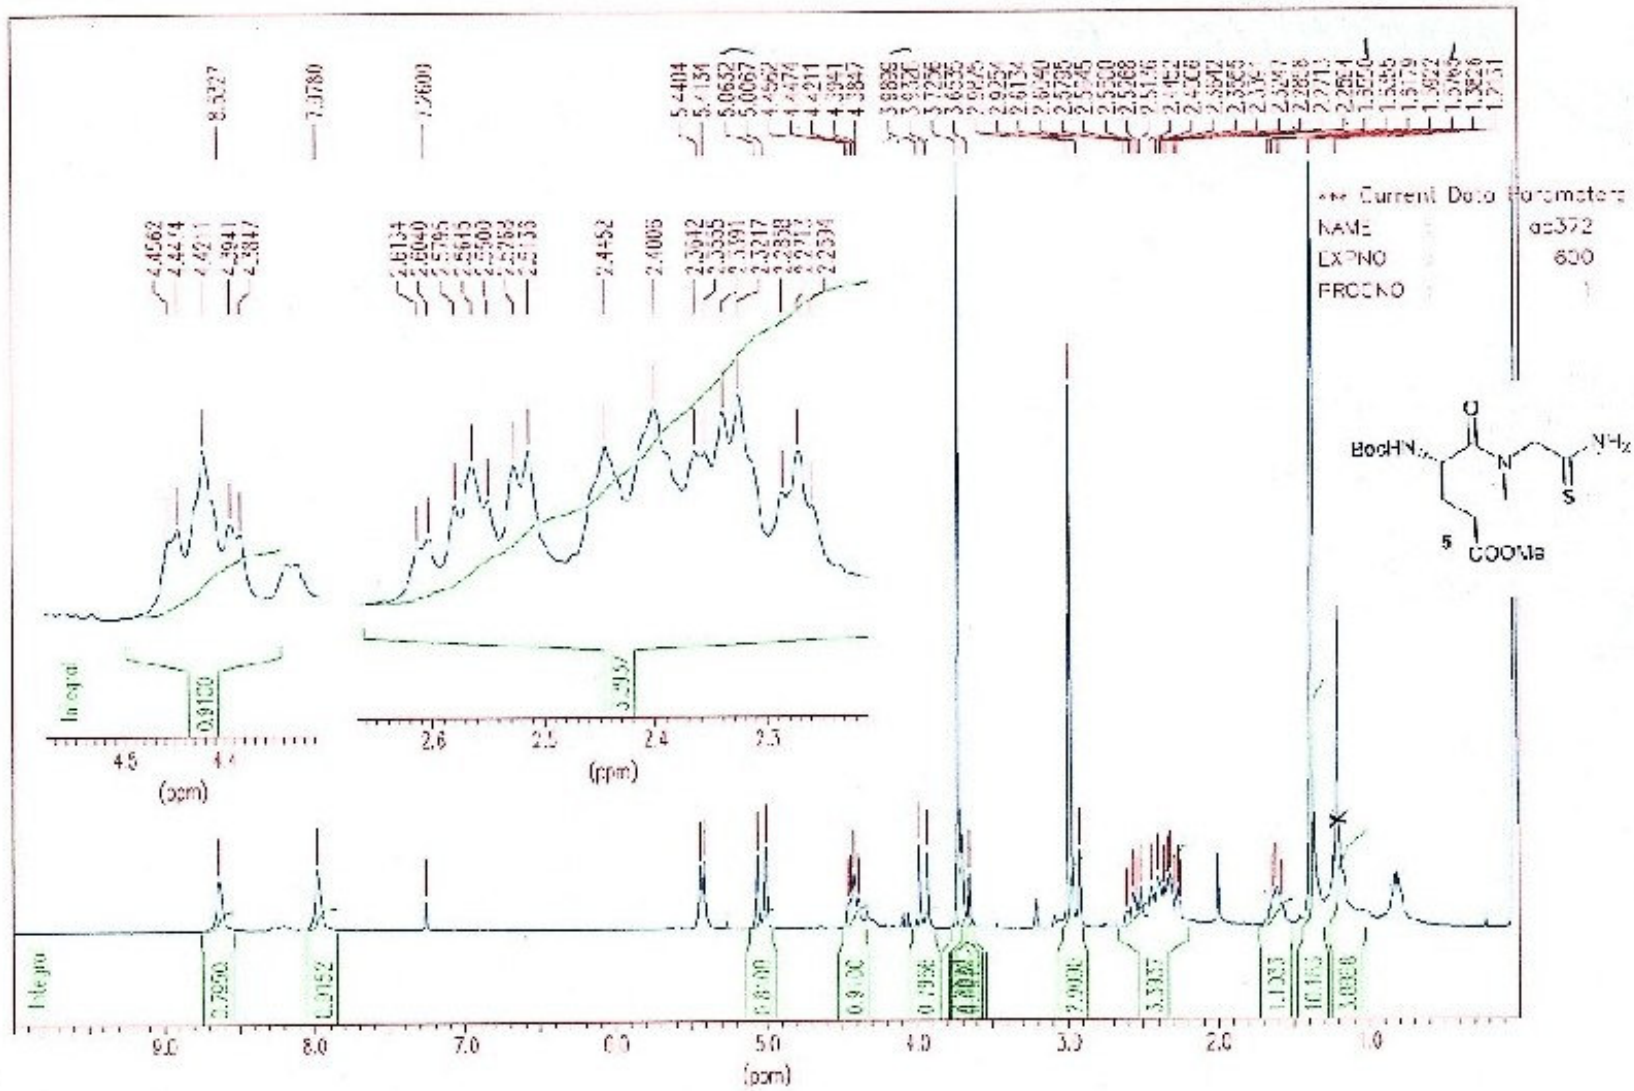

AC372

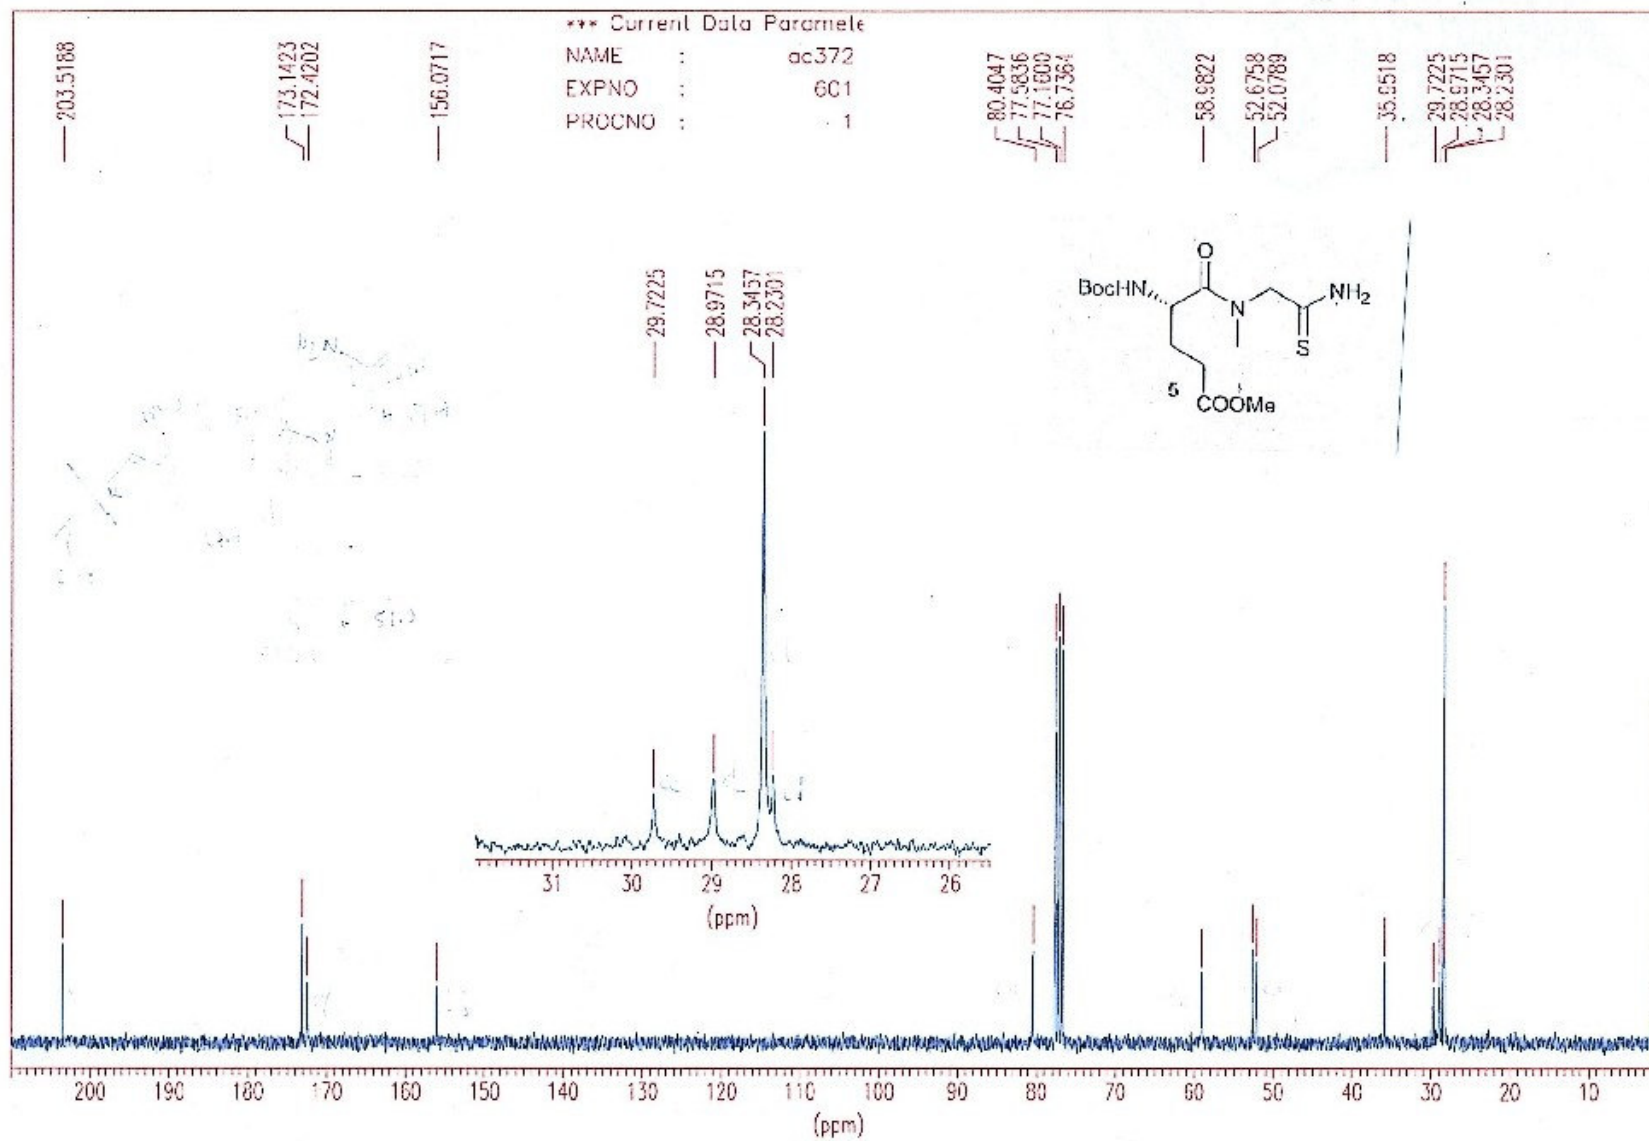



AC374..

172.7186  
168.1742

155.6132  
148.6039

127.6304  
124.5590  
123.6058

85.4198  
80.0338  
77.5836  
77.1690  
76.7354

53.2746  
52.5506

32.9383  
30.2039  
29.7995  
28.3842  
28.2686  
23.0987

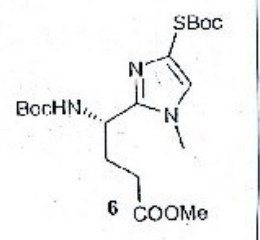

\*\*\* Current Data Parameters  
NAME : ac374  
EXPNO : 221  
PROCNO : 1

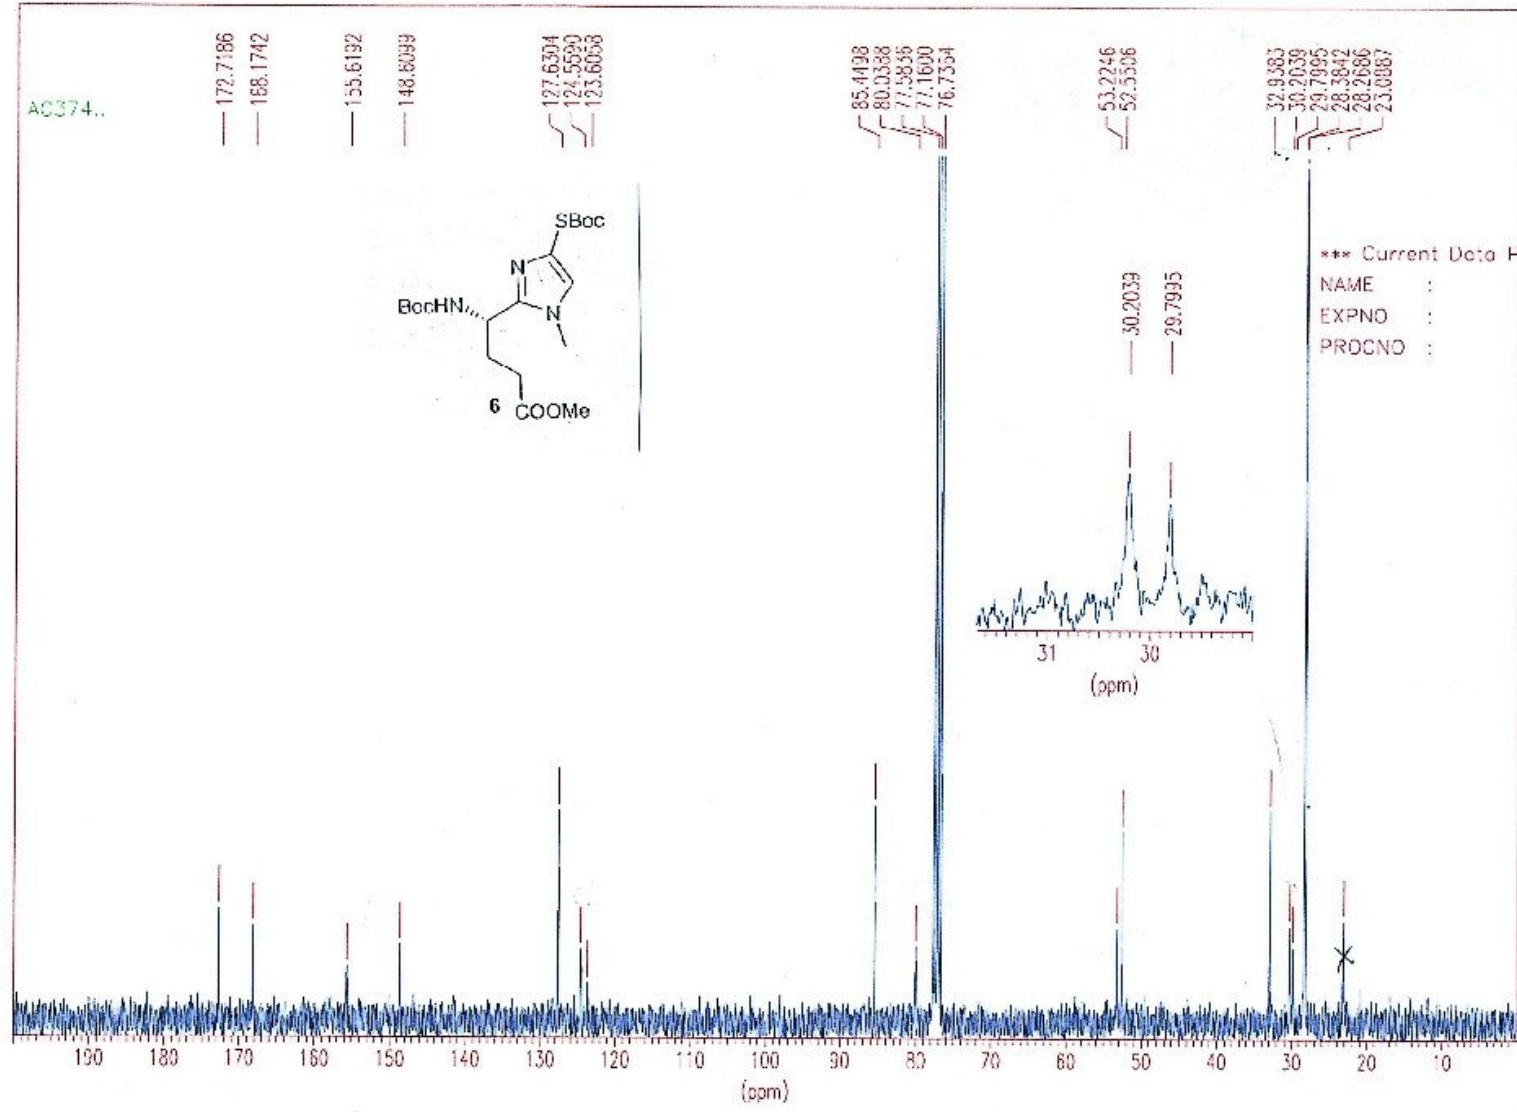



CP-71

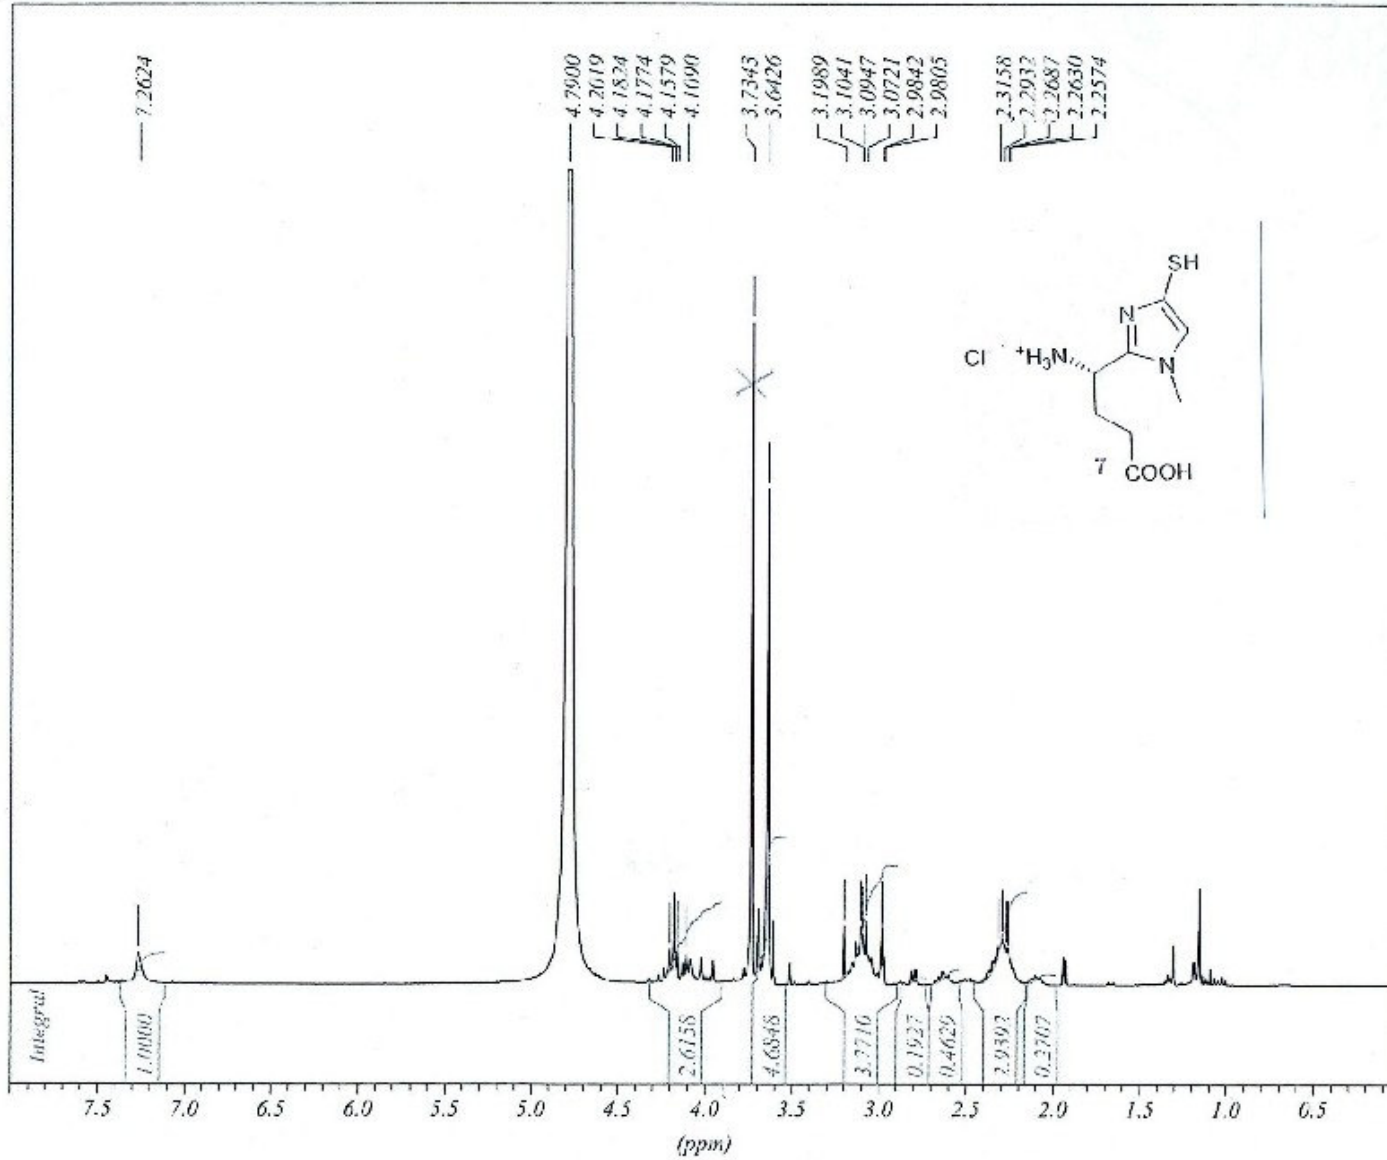

\*\*\* Current Data Parameters \*\*\*

NAME : nov96  
EXPNO : 510  
PROCNO : 1

\*\*\* Processing Parameters \*\*\*

ABSF2 : -4.199 ppm

CF 71

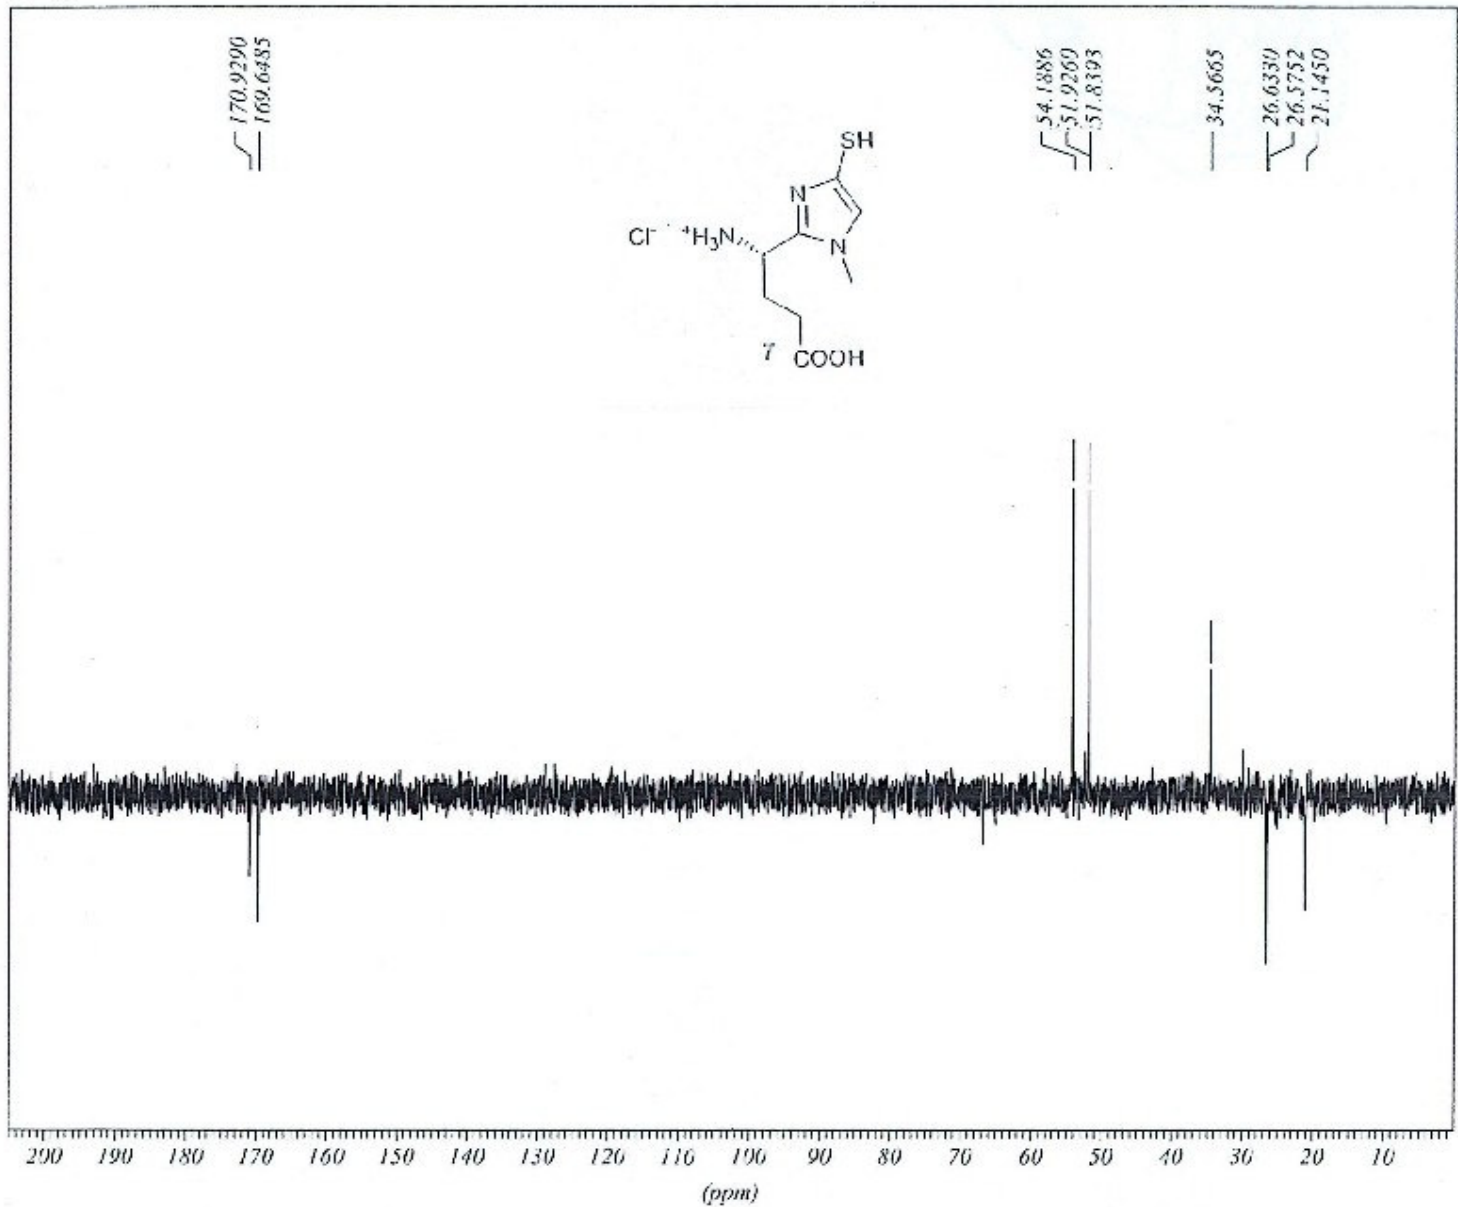

\*\*\* Current Data Parameters \*\*\*

NAME : nov06  
EXPNO : 511  
PROCNO : 1

\*\*\* Processing Parameters \*\*\*

ABSF2 : -31.472 ppm

400 (CDCl<sub>3</sub>)

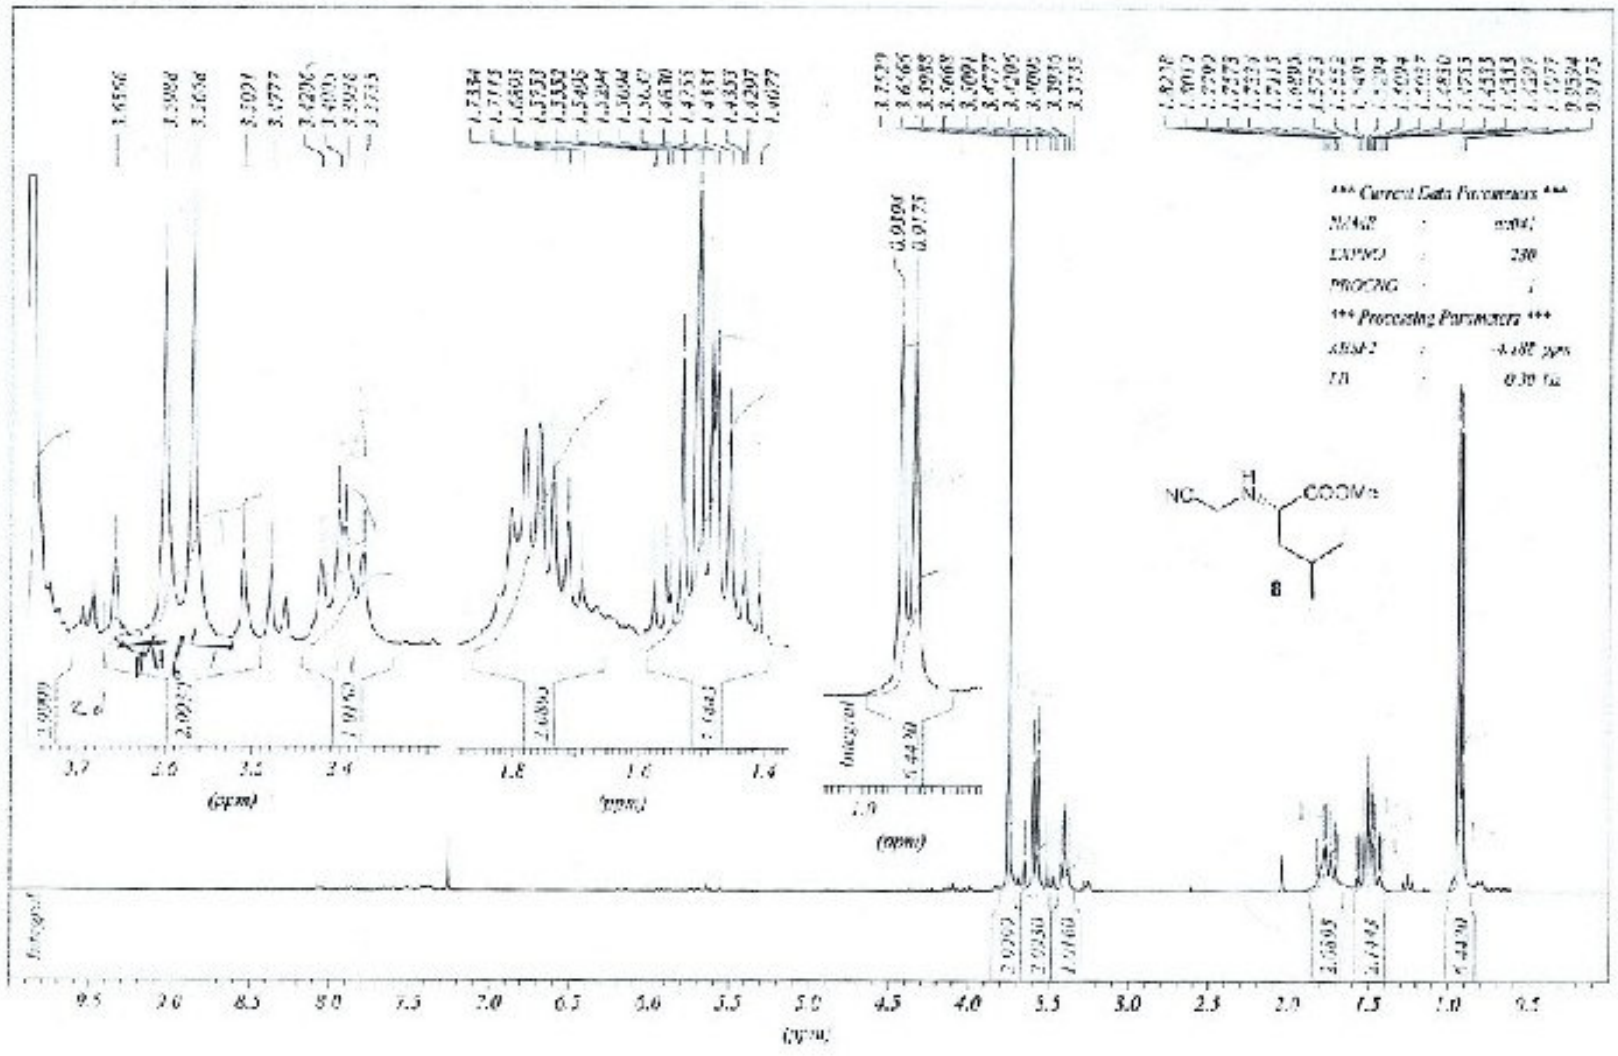

AC41

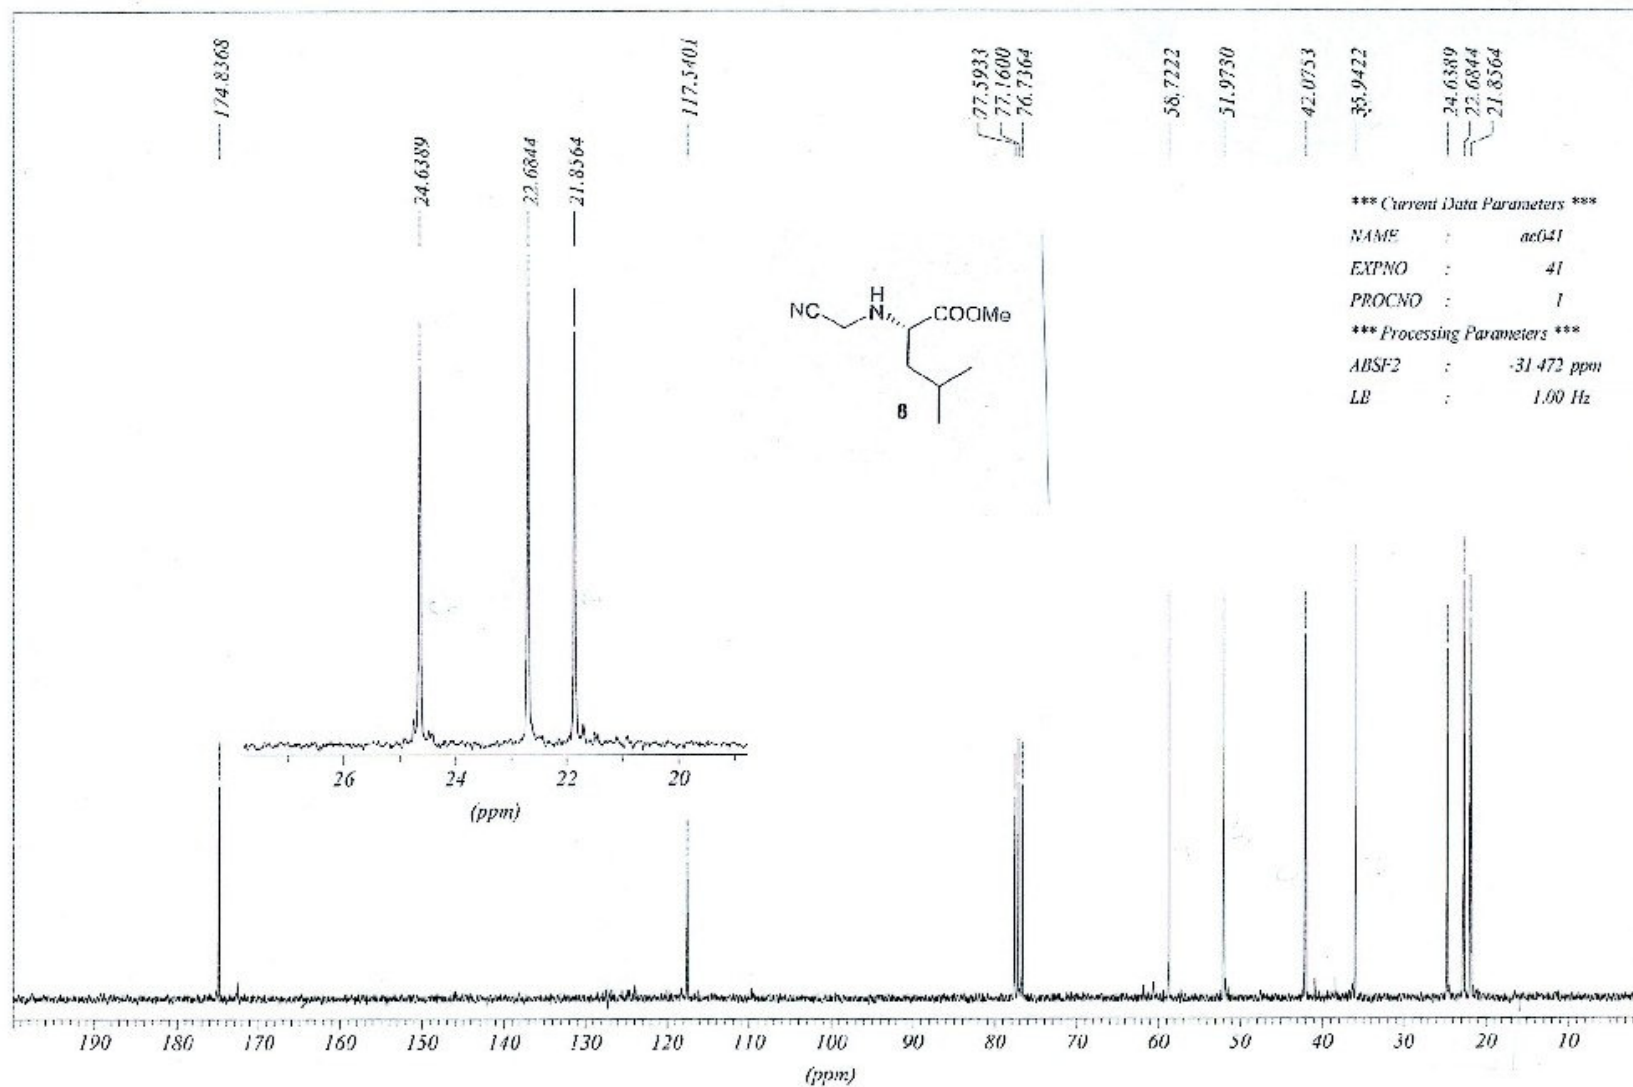



\*\*\* Acquire Date: 09/20/05 \*\*\*

NAME : ccb60

21591306.DC15

EXNO : 240

PROCNO : 1

\*\*\* Processing Parameters \*\*\*

ASFO : -31.422 ppm

GB : 1.00 Hz

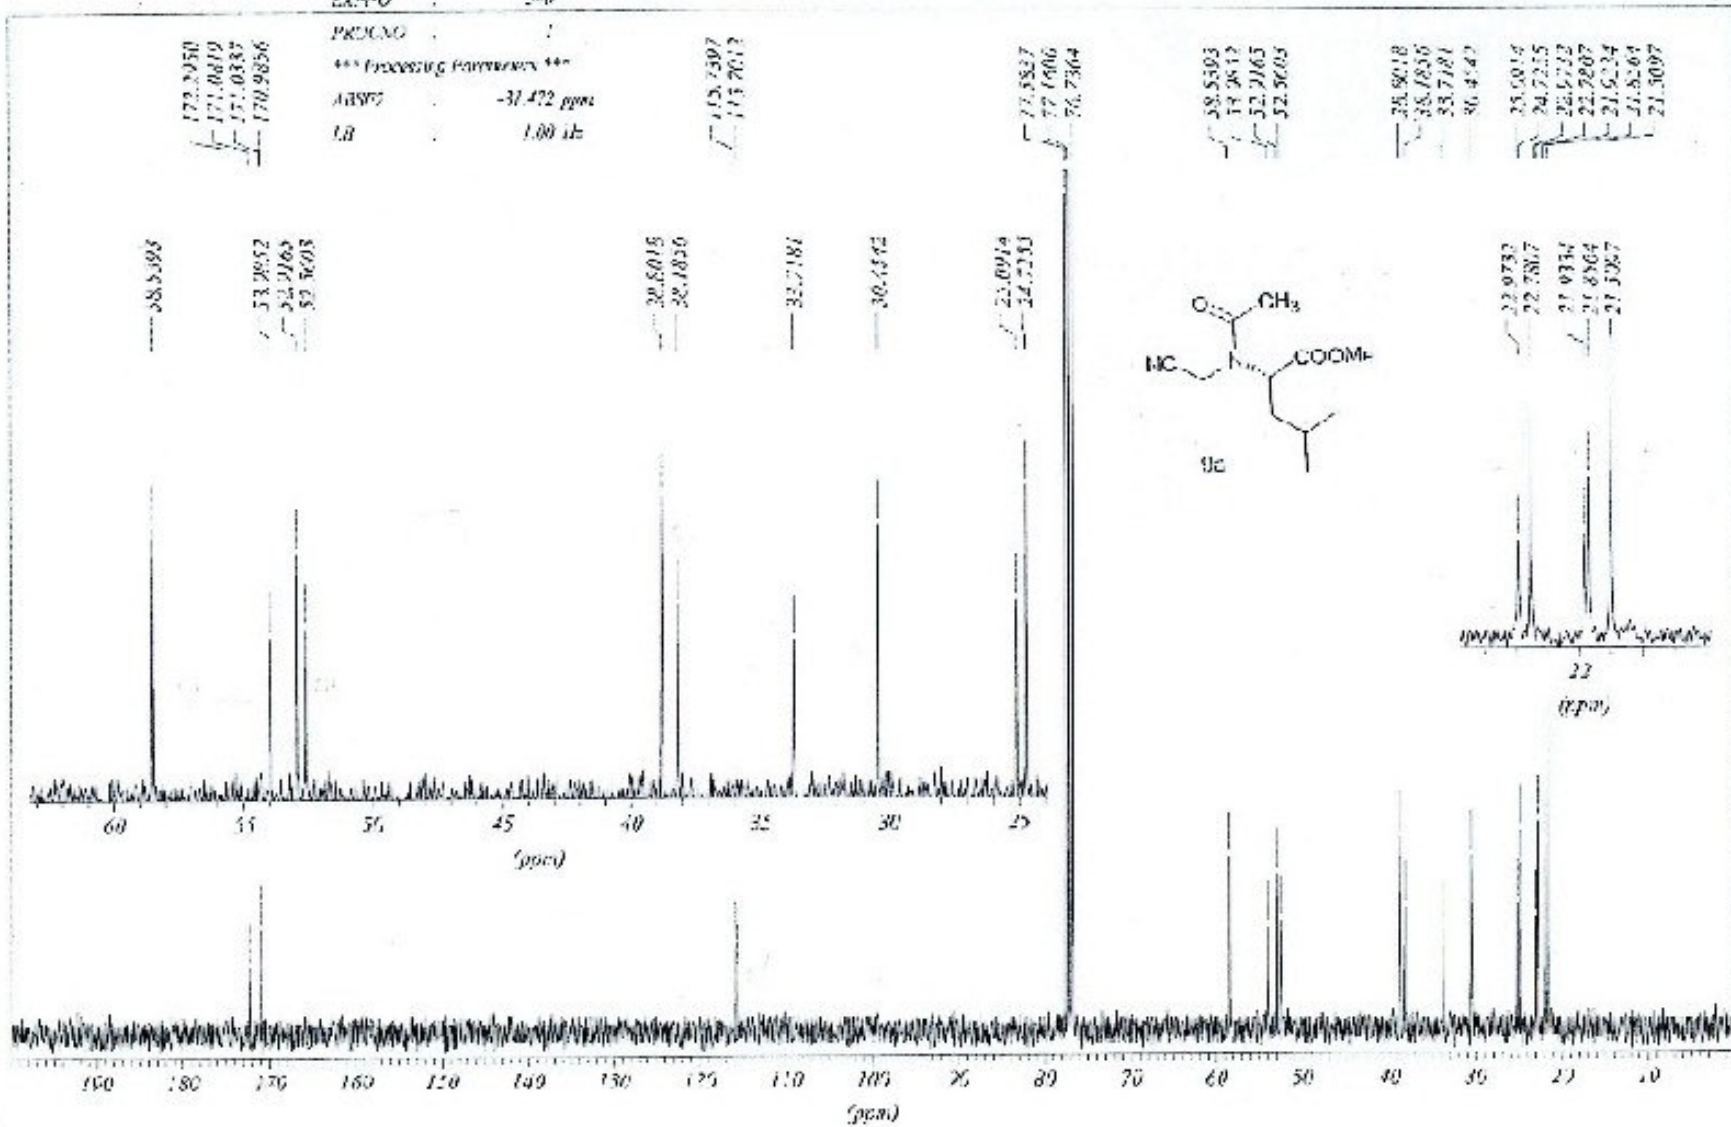



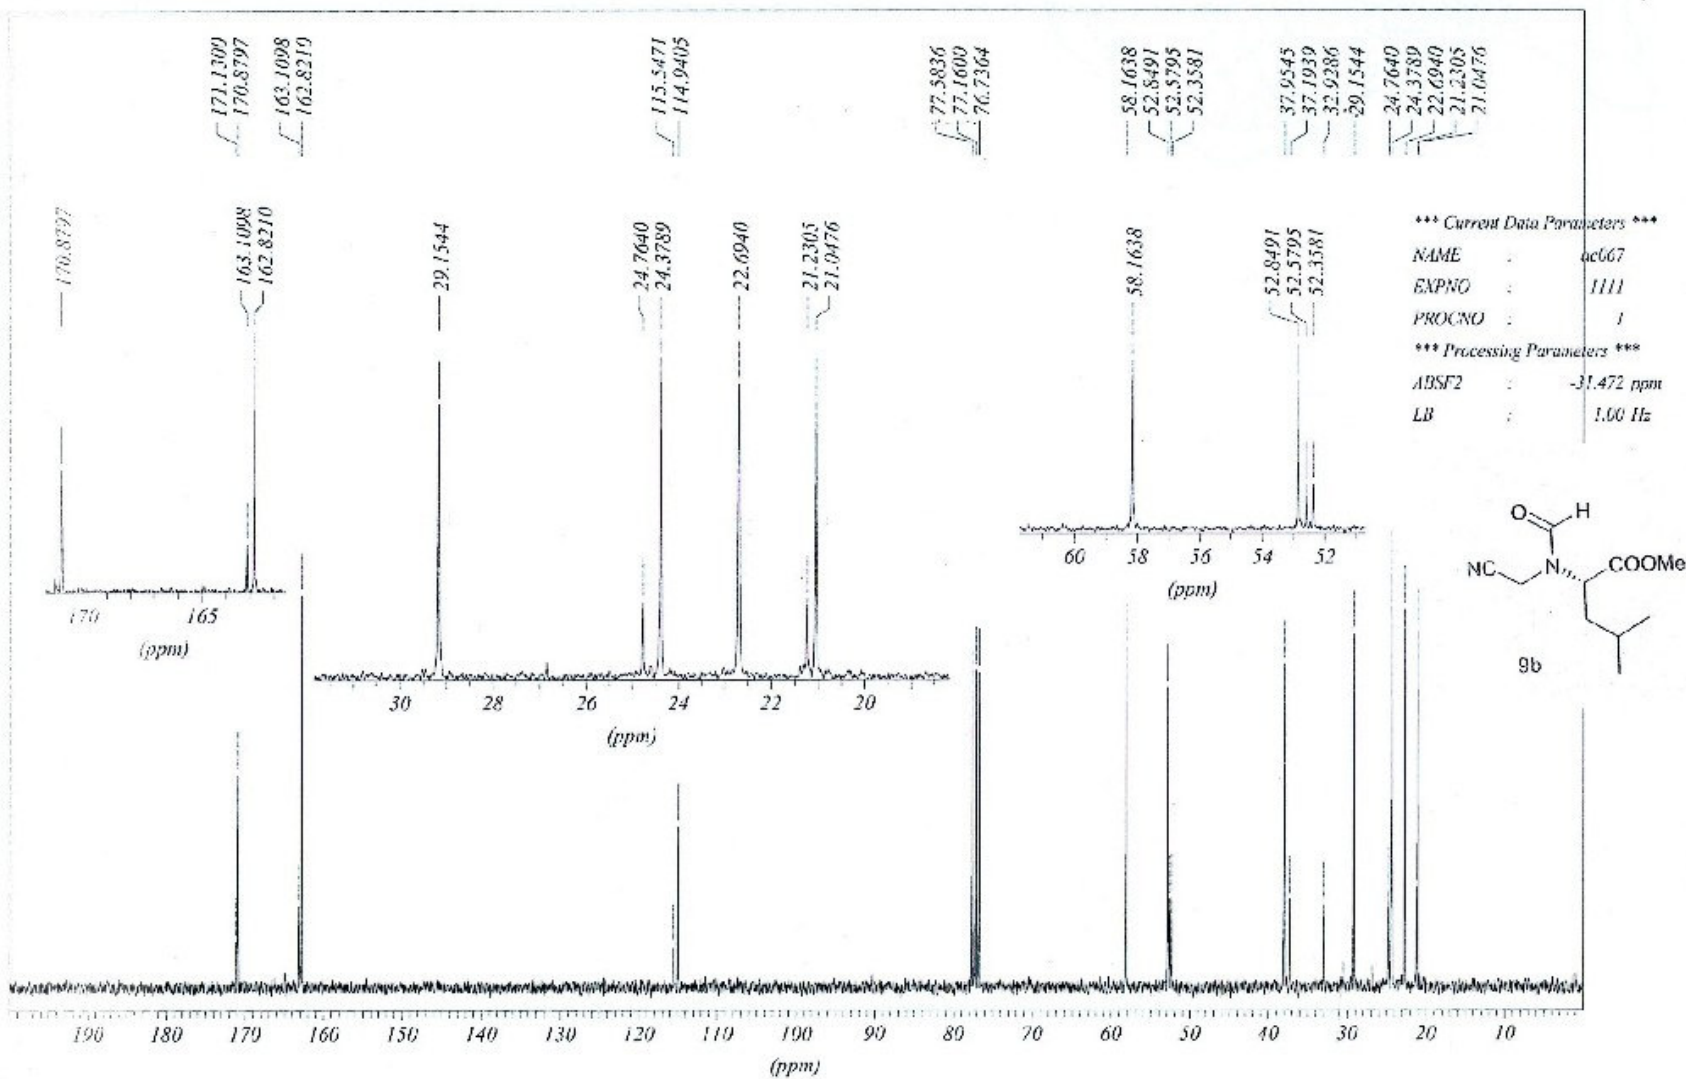



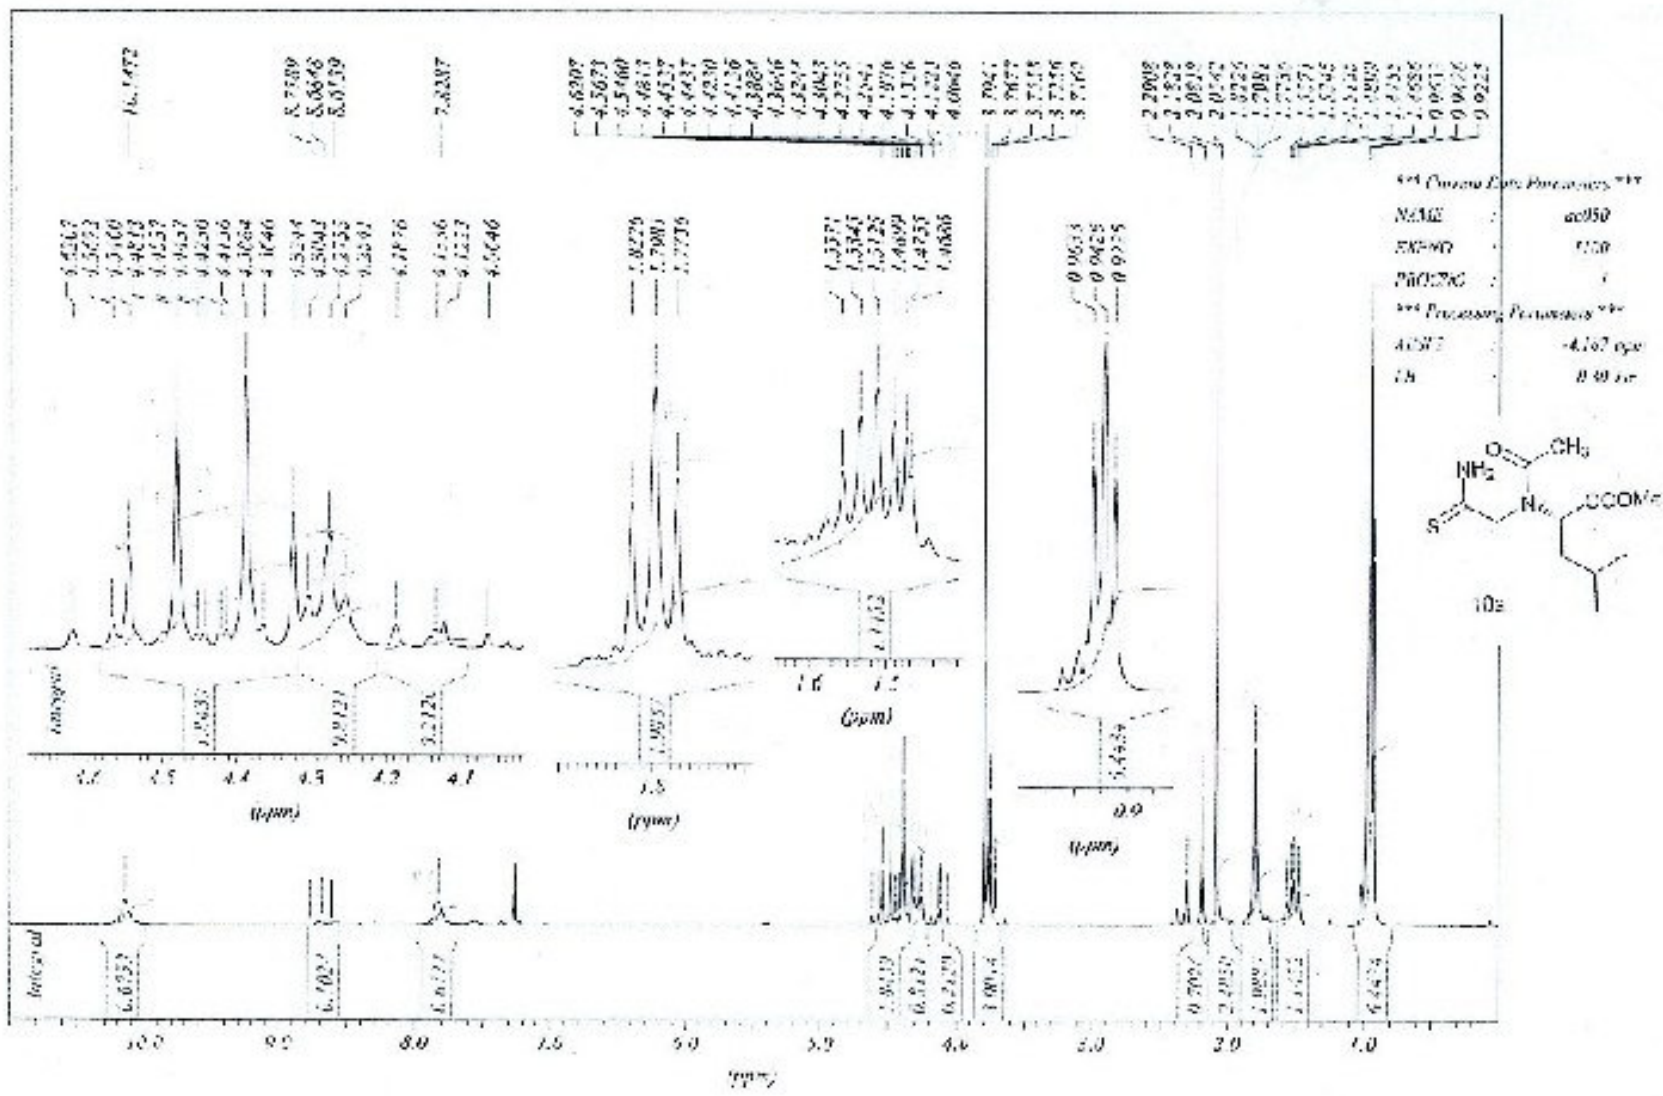

ac050

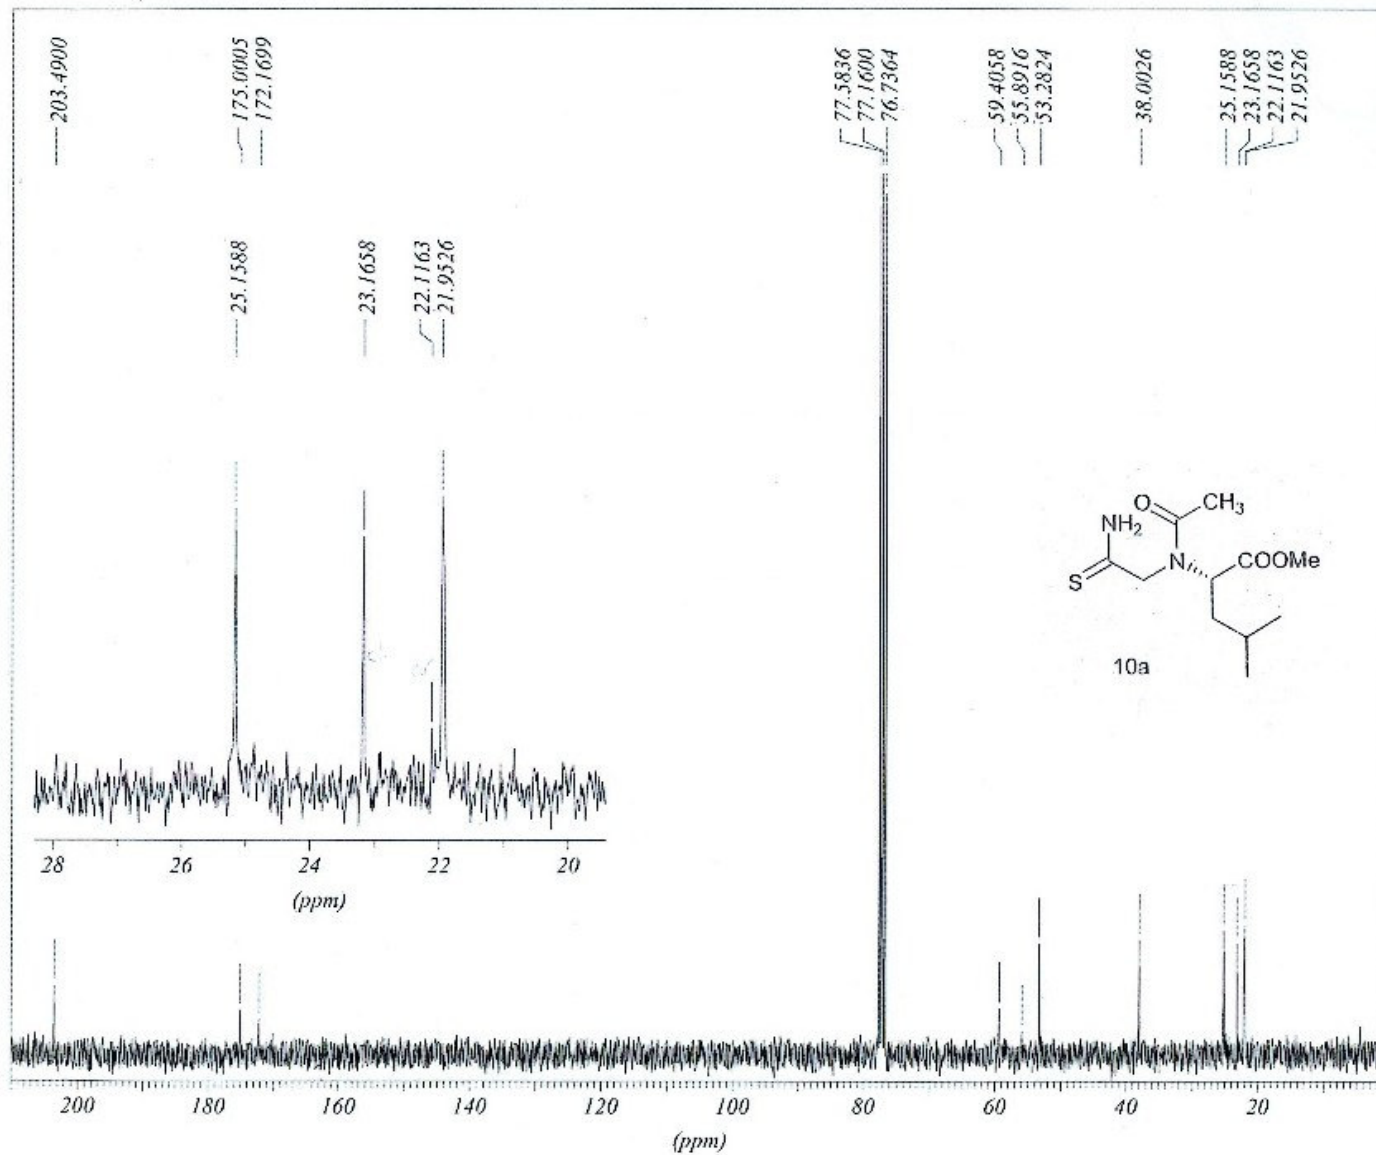

\*\*\* Current Data Parameters \*\*\*

NAME : ac050  
EXPNO : 1101  
PROCNO : 1

\*\*\* Processing Parameters \*\*\*

ABSF2 : -31.472 ppm  
LB : 1.00 Hz

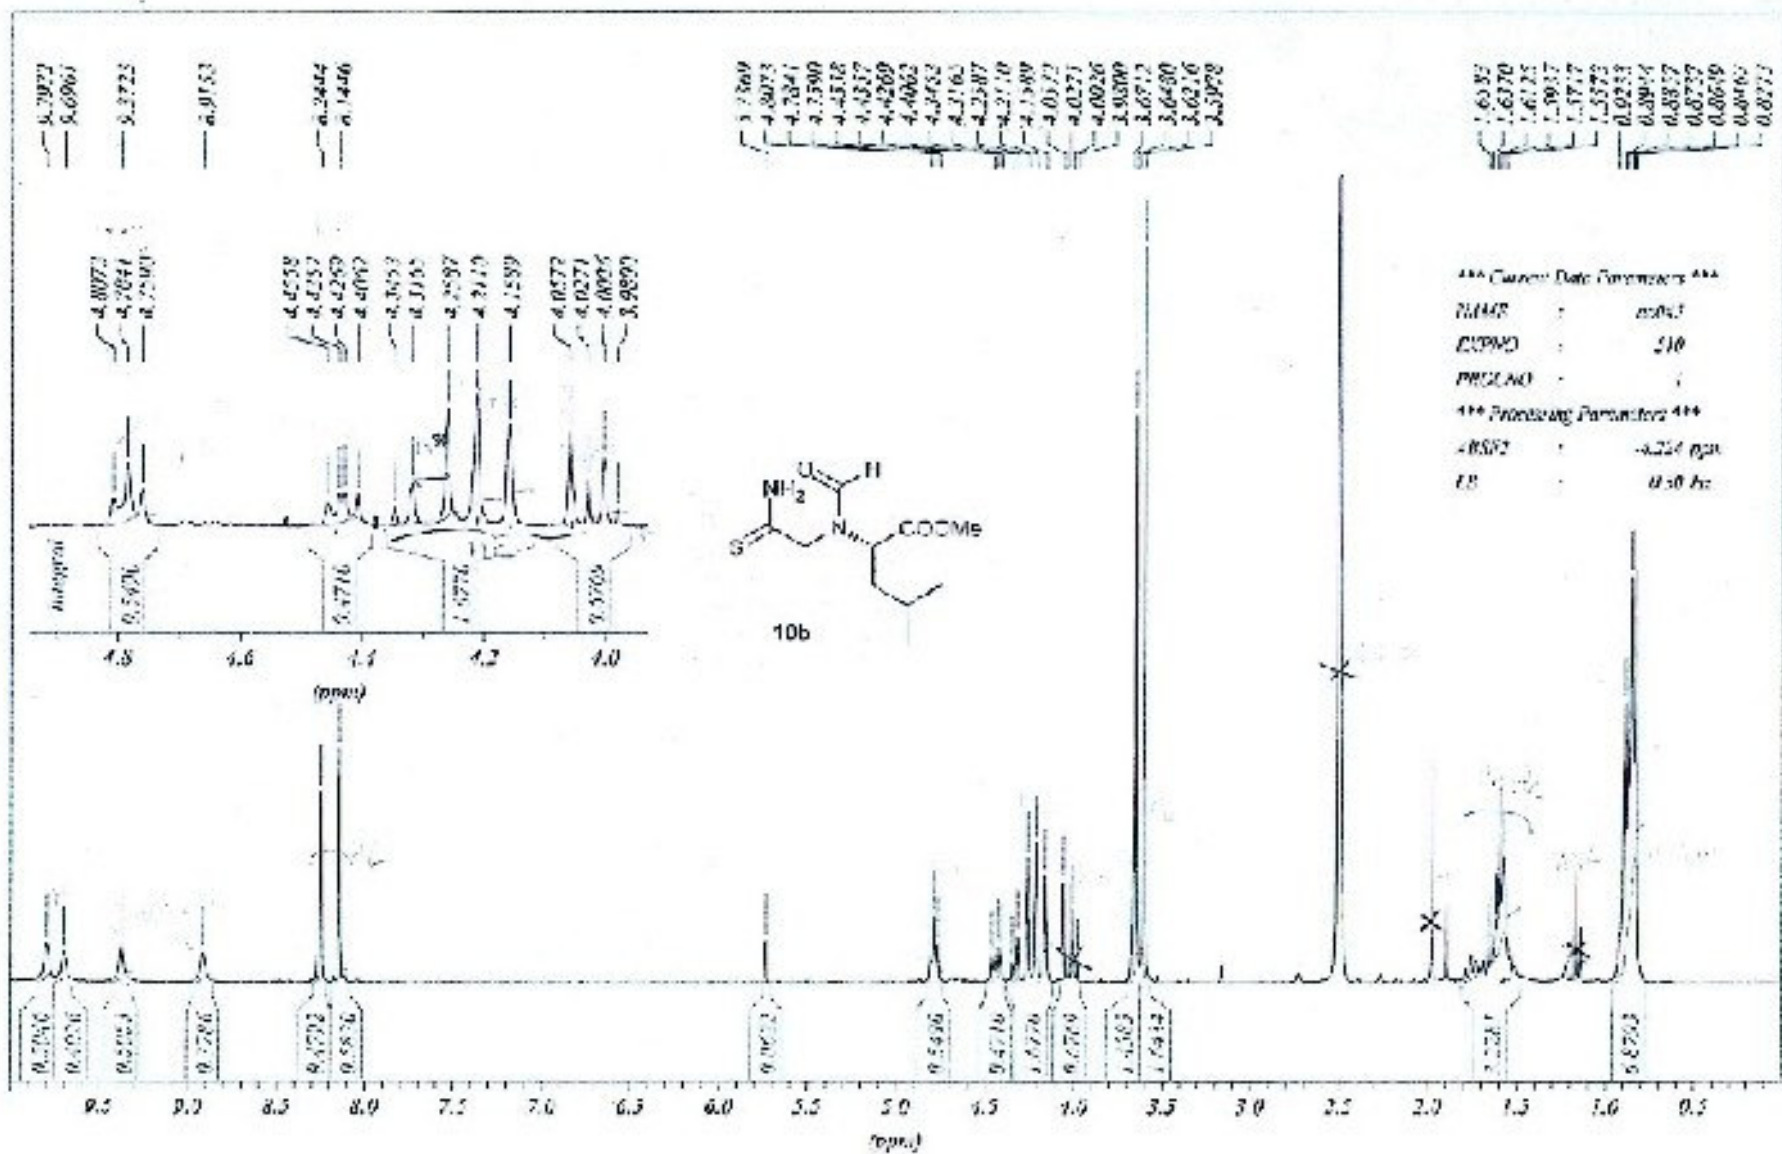

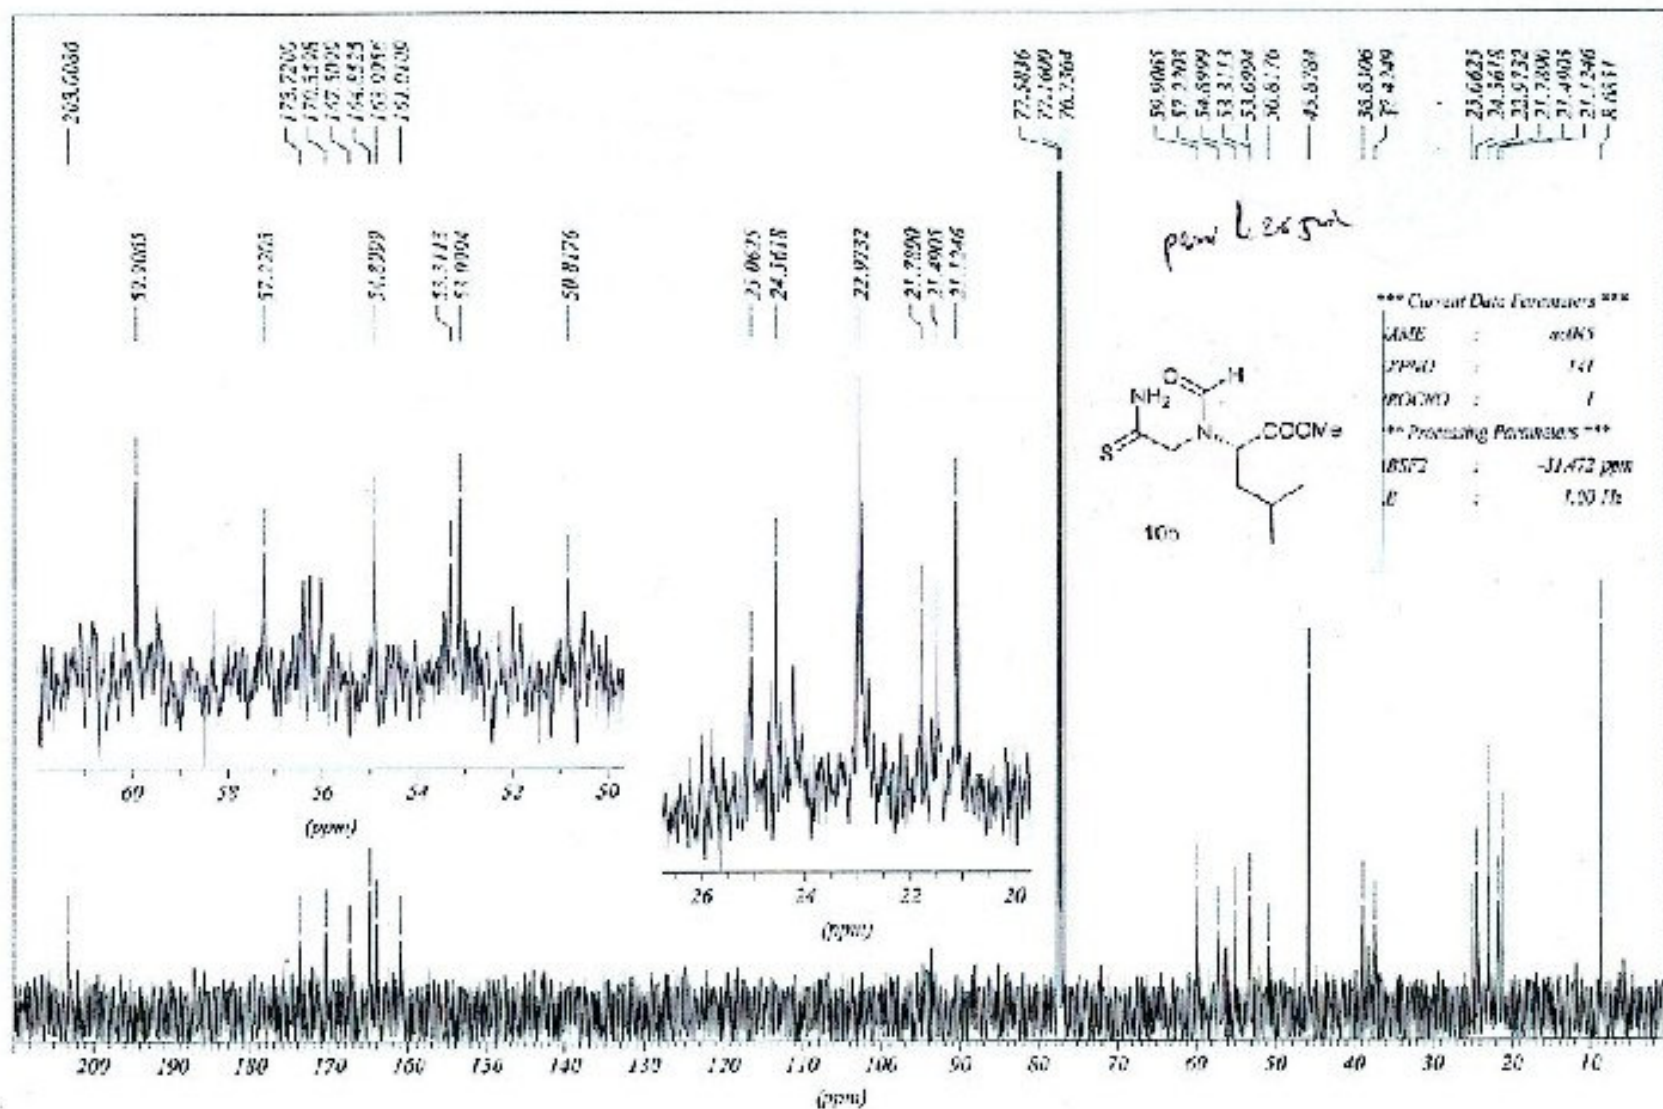

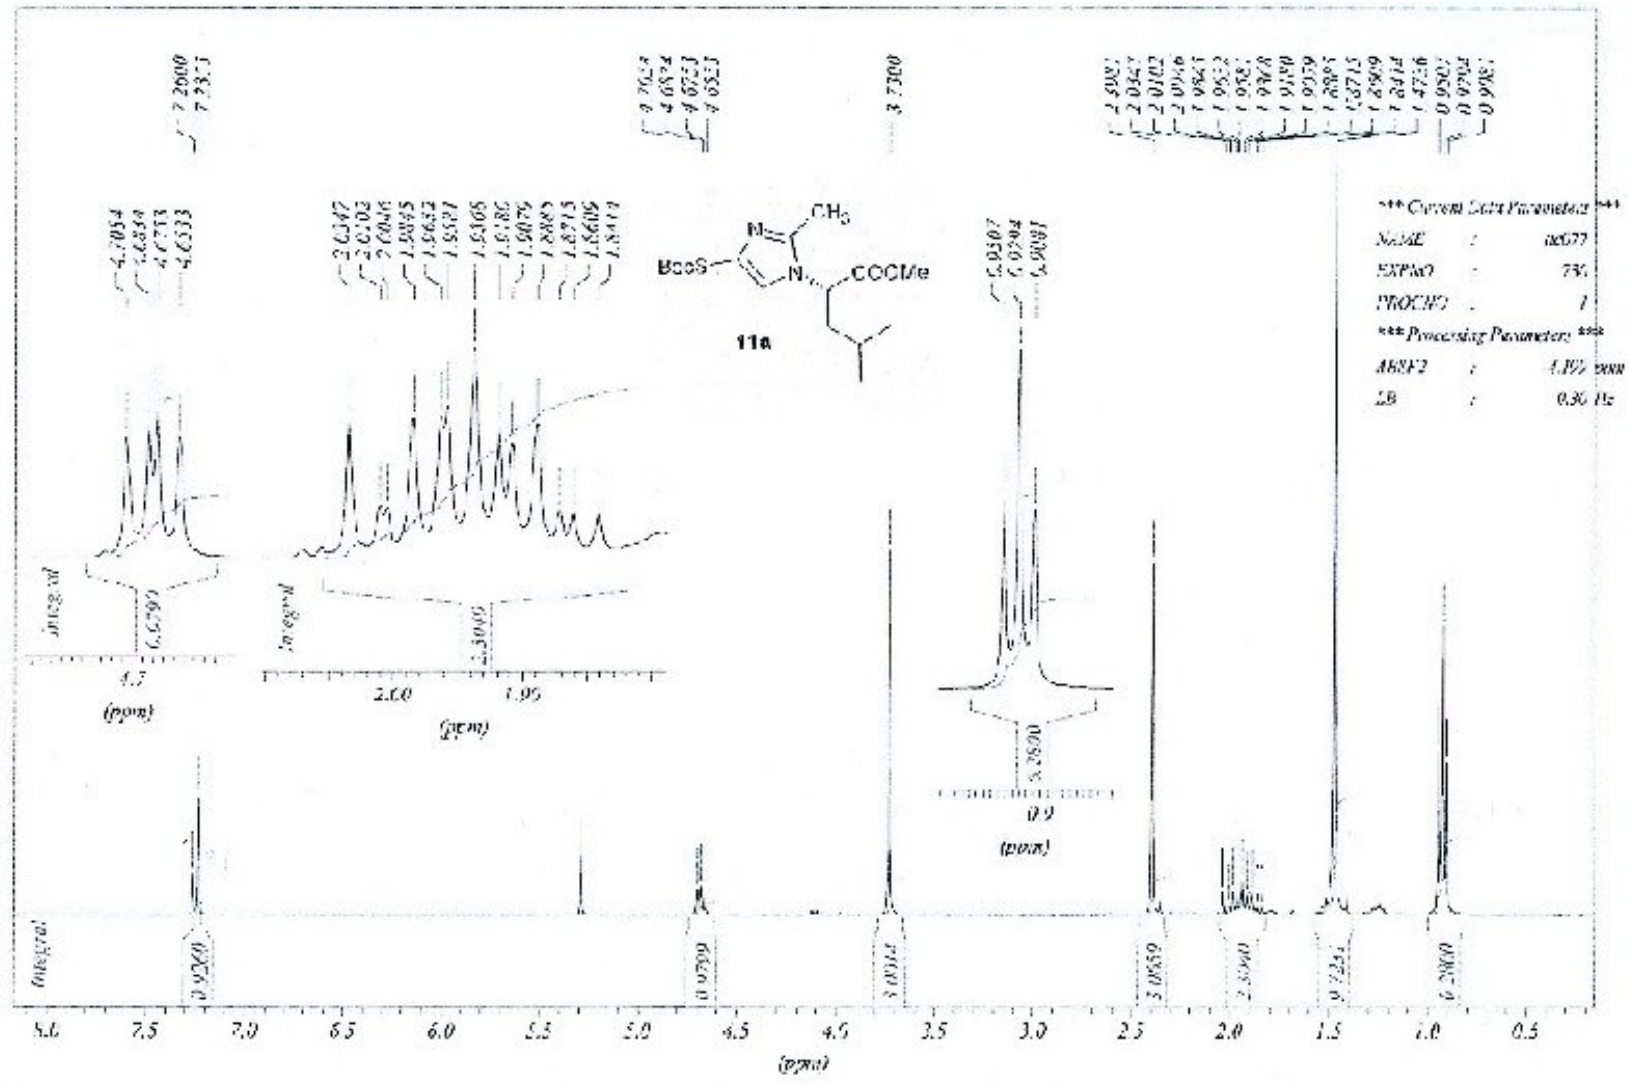

ac77

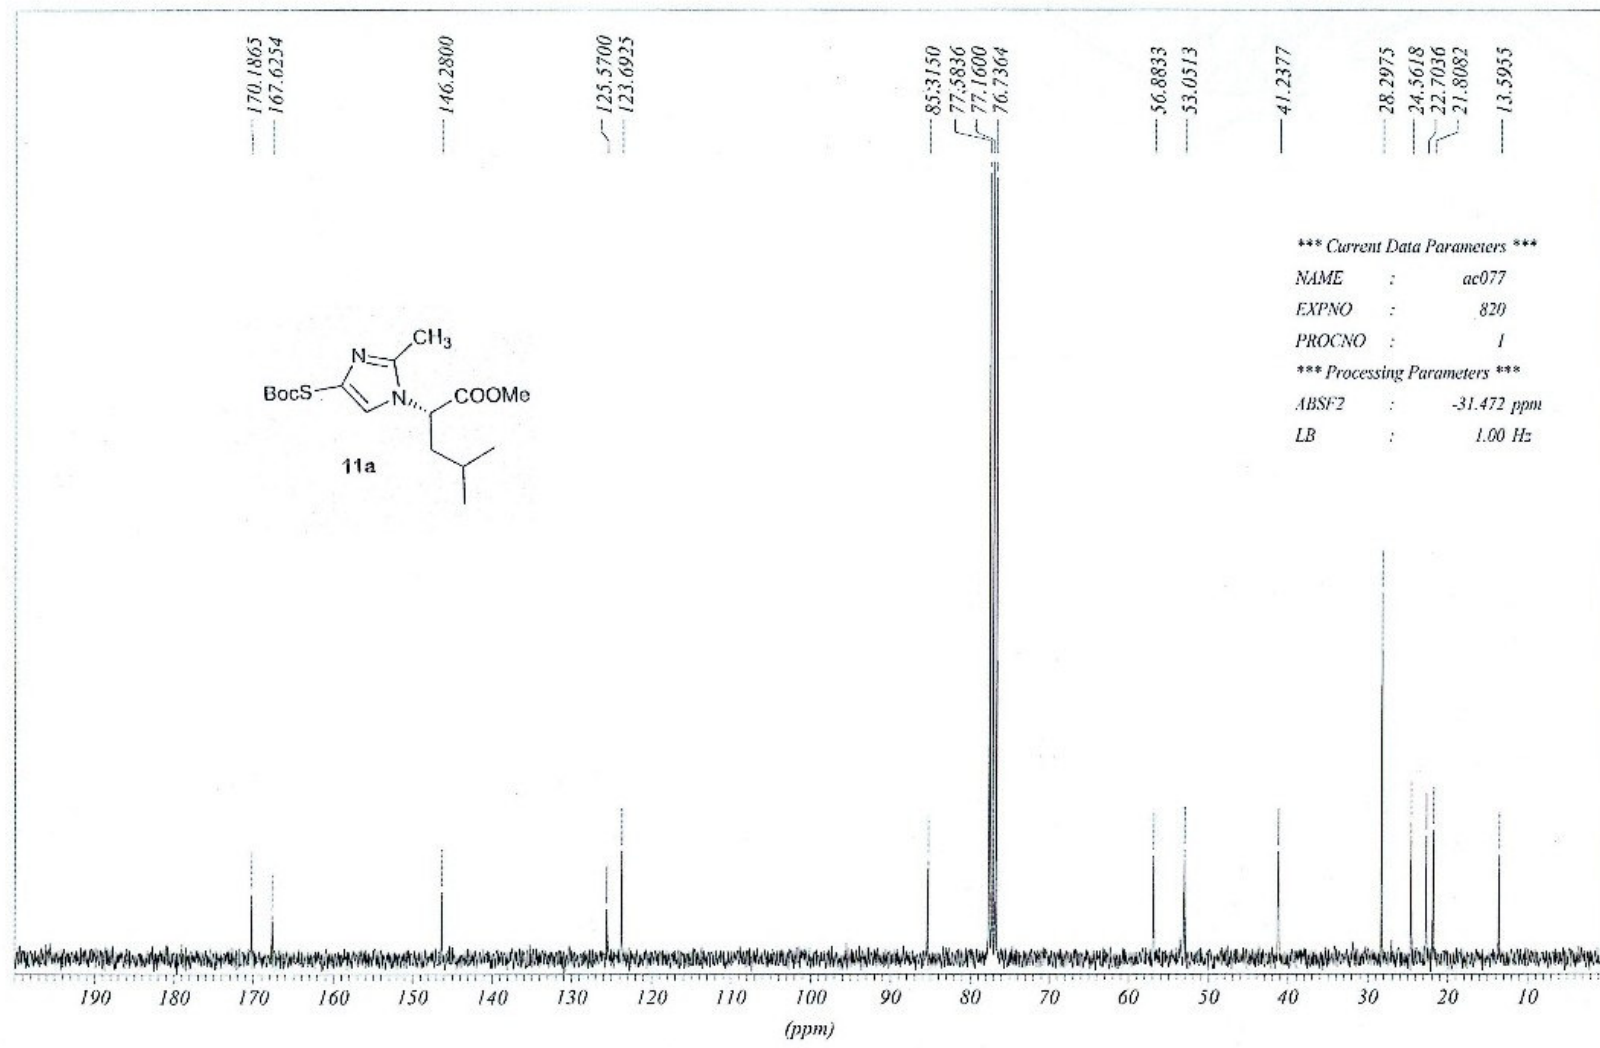

\*\*\* Current Data Parameters \*\*\*

NAME : uc102  
 EXPNO : 30  
 PROCNO : 1  
 \*\*\* Processing Parameters \*\*\*  
 ASSET : 4.168 ppm  
 Q3 : 6.30 Hz

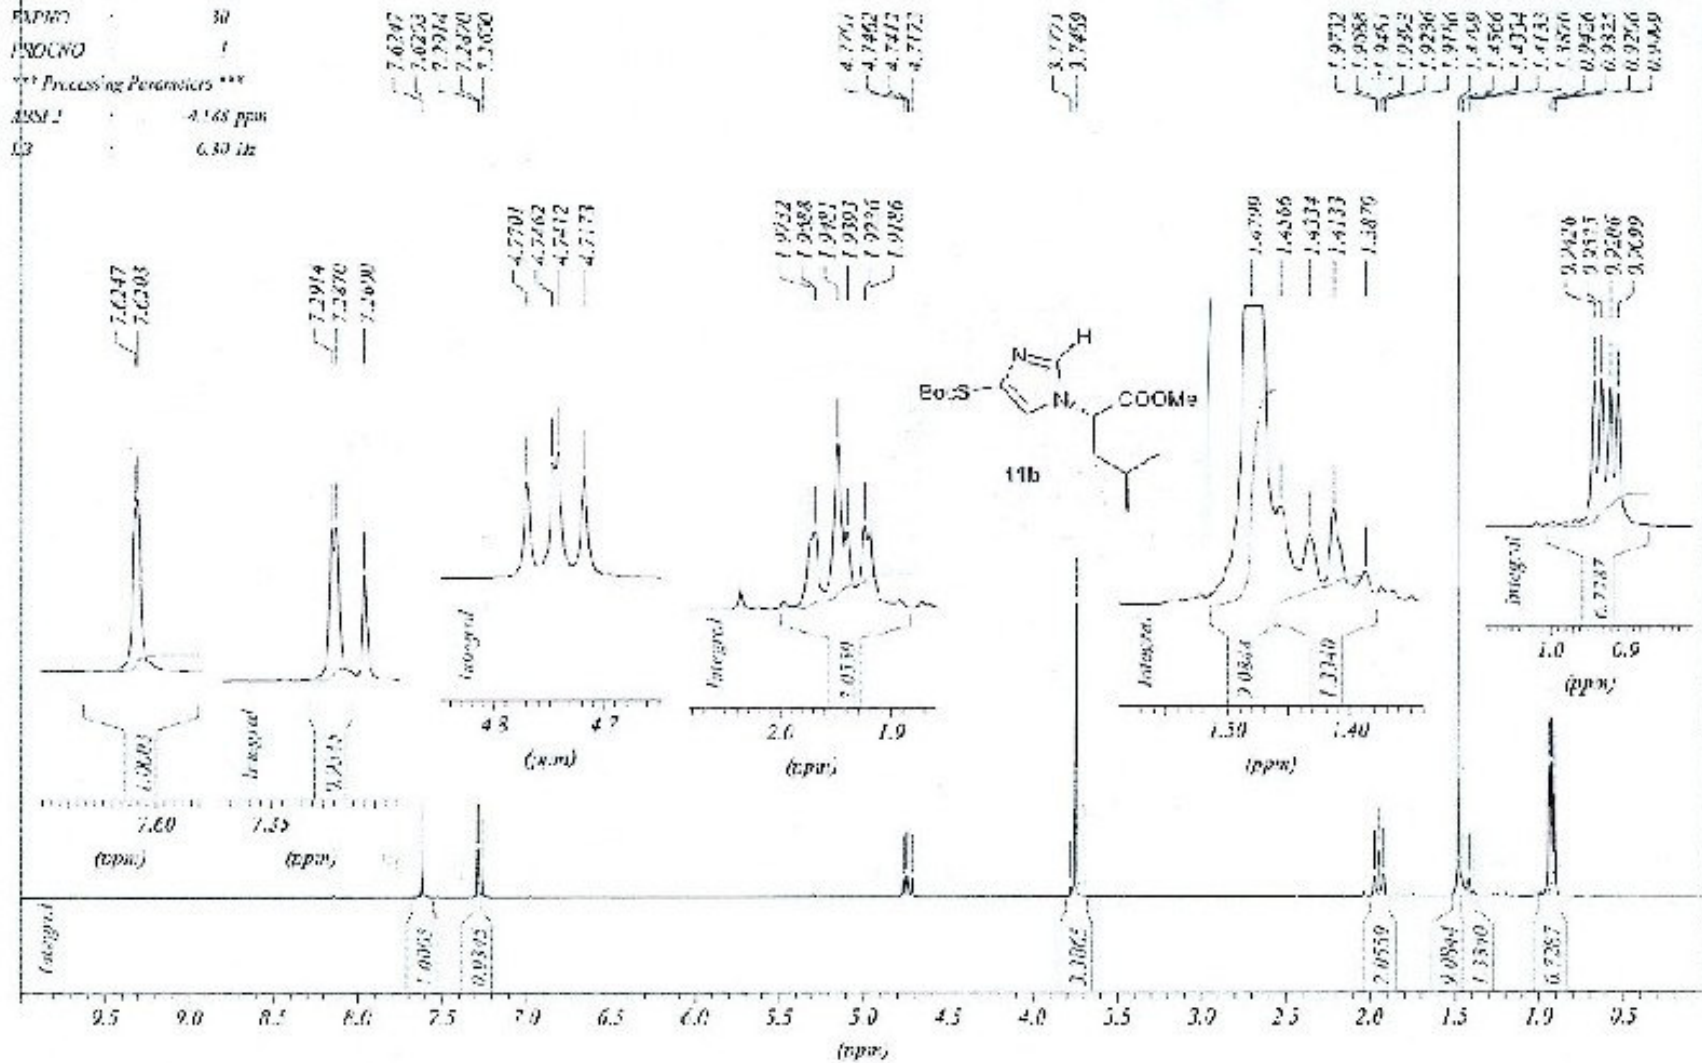

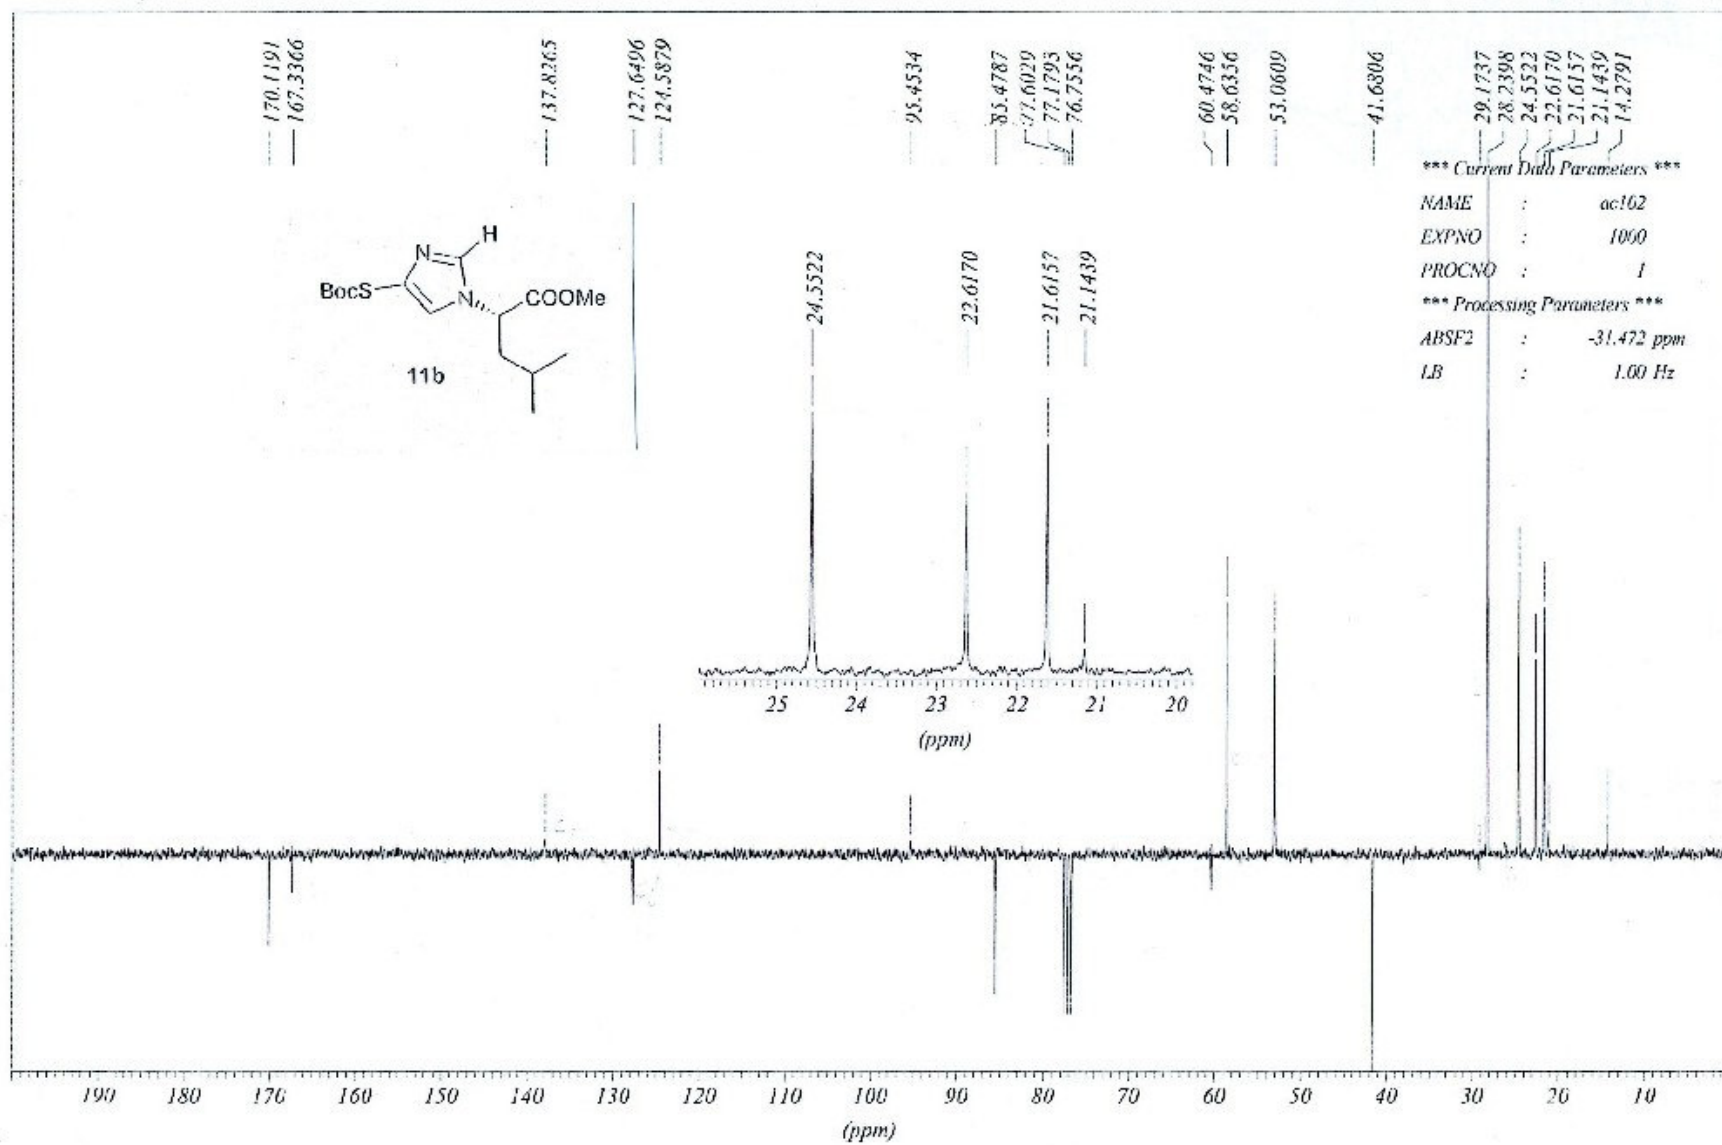



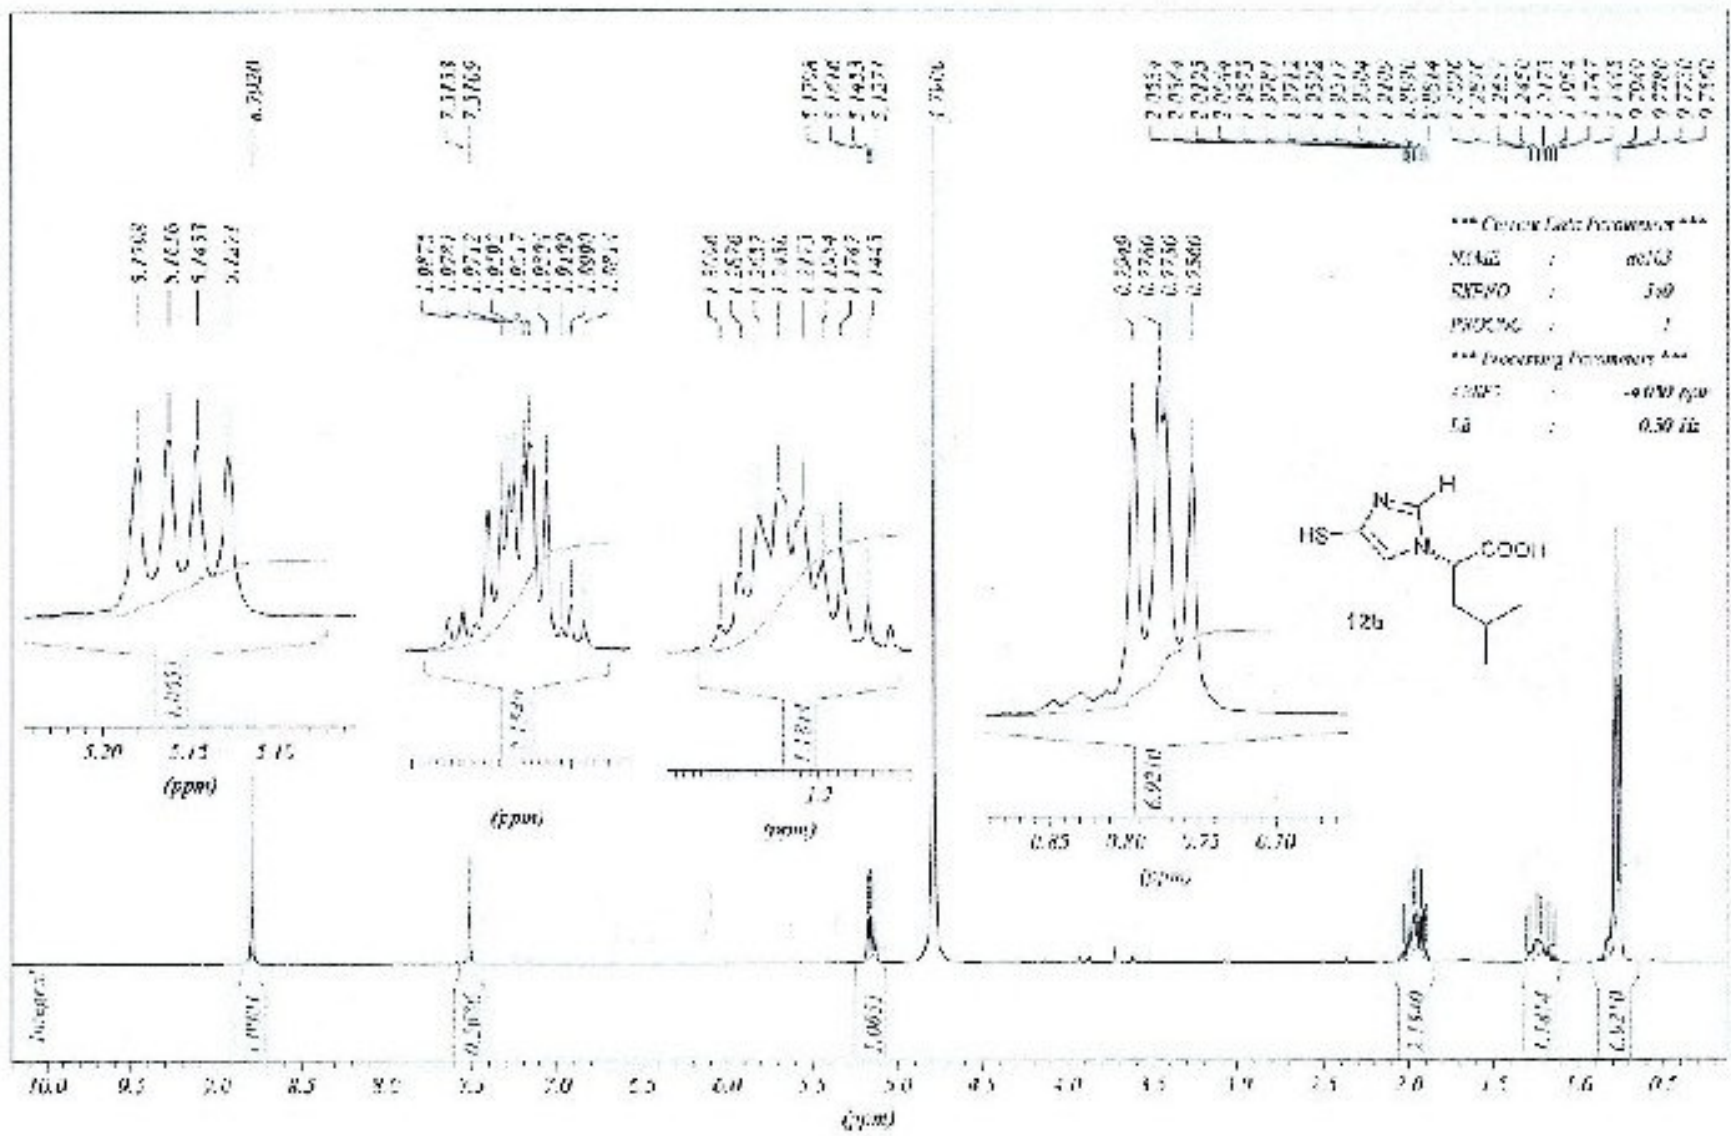

AC103 020

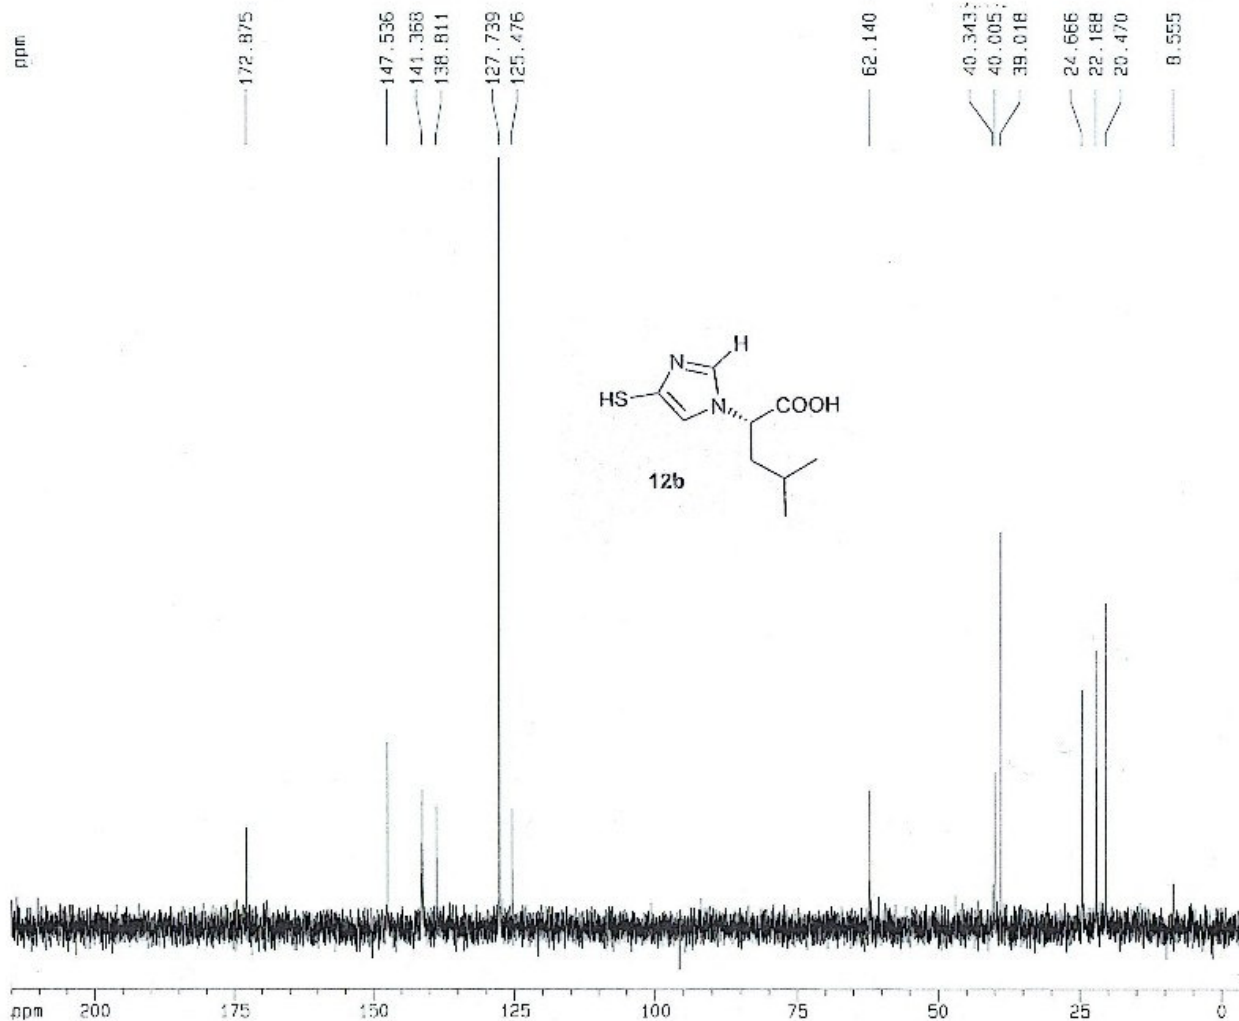

Current Data Parameters  
 NAME: un27-2006  
 EXPNO: 863  
 PROCNO: 1

F2 - Acquisition Parameters  
 Date\_: 20060827  
 Time: 12.57  
 INSTRUM: spect  
 PROBHD: 5 mm QNP 1H/1  
 PULPROG: zgpg30  
 TD: 65536  
 SOLVENT: D2O  
 NS: 1100  
 DS: 2  
 SWH: 23909.523 Hz  
 FIDRES: 0.363304 Hz  
 AQ: 1.3763061 sec  
 RG: 15304  
 CW: 21.000 USEC  
 CE: 7.50 USEC  
 TE: 300.0 K  
 C1: 2.00000000 sec  
 C11: 0.00000000 sec  
 C12: 0.00002000 sec

----- CHANNEL f1 -----  
 NUC1: 13C  
 P1: 7.20 USEC  
 PL1: -9.00 DB  
 SFO1: 75.4772501 MHz

----- CHANNEL f2 -----  
 CPDPRG2: MSLZ16  
 NUC2: 1H  
 PCPD2: 100.00 USEC  
 PL2: -6.00 DB  
 PL12: 15.00 DB  
 PL13: 16.00 DB  
 SFO2: 300.1312005 MHz

F2 - Processing parameters  
 SI: 32768  
 SF: 75.4677190 MHz  
 WCN: EM  
 SSB: 0  
 LB: 1.00 Hz  
 GB: 0  
 PC: 1.40

13C NMR plot parameters  
 CX: 20.00 cm  
 FIP: 215.000 ppm  
 F1: 16225.55 Hz  
 F2P: -5.000 ppm  
 F2: -377.34 Hz  
 PPHCN: 11.00000 ppm/cm  
 HZCN: 650.14480 Hz/cm

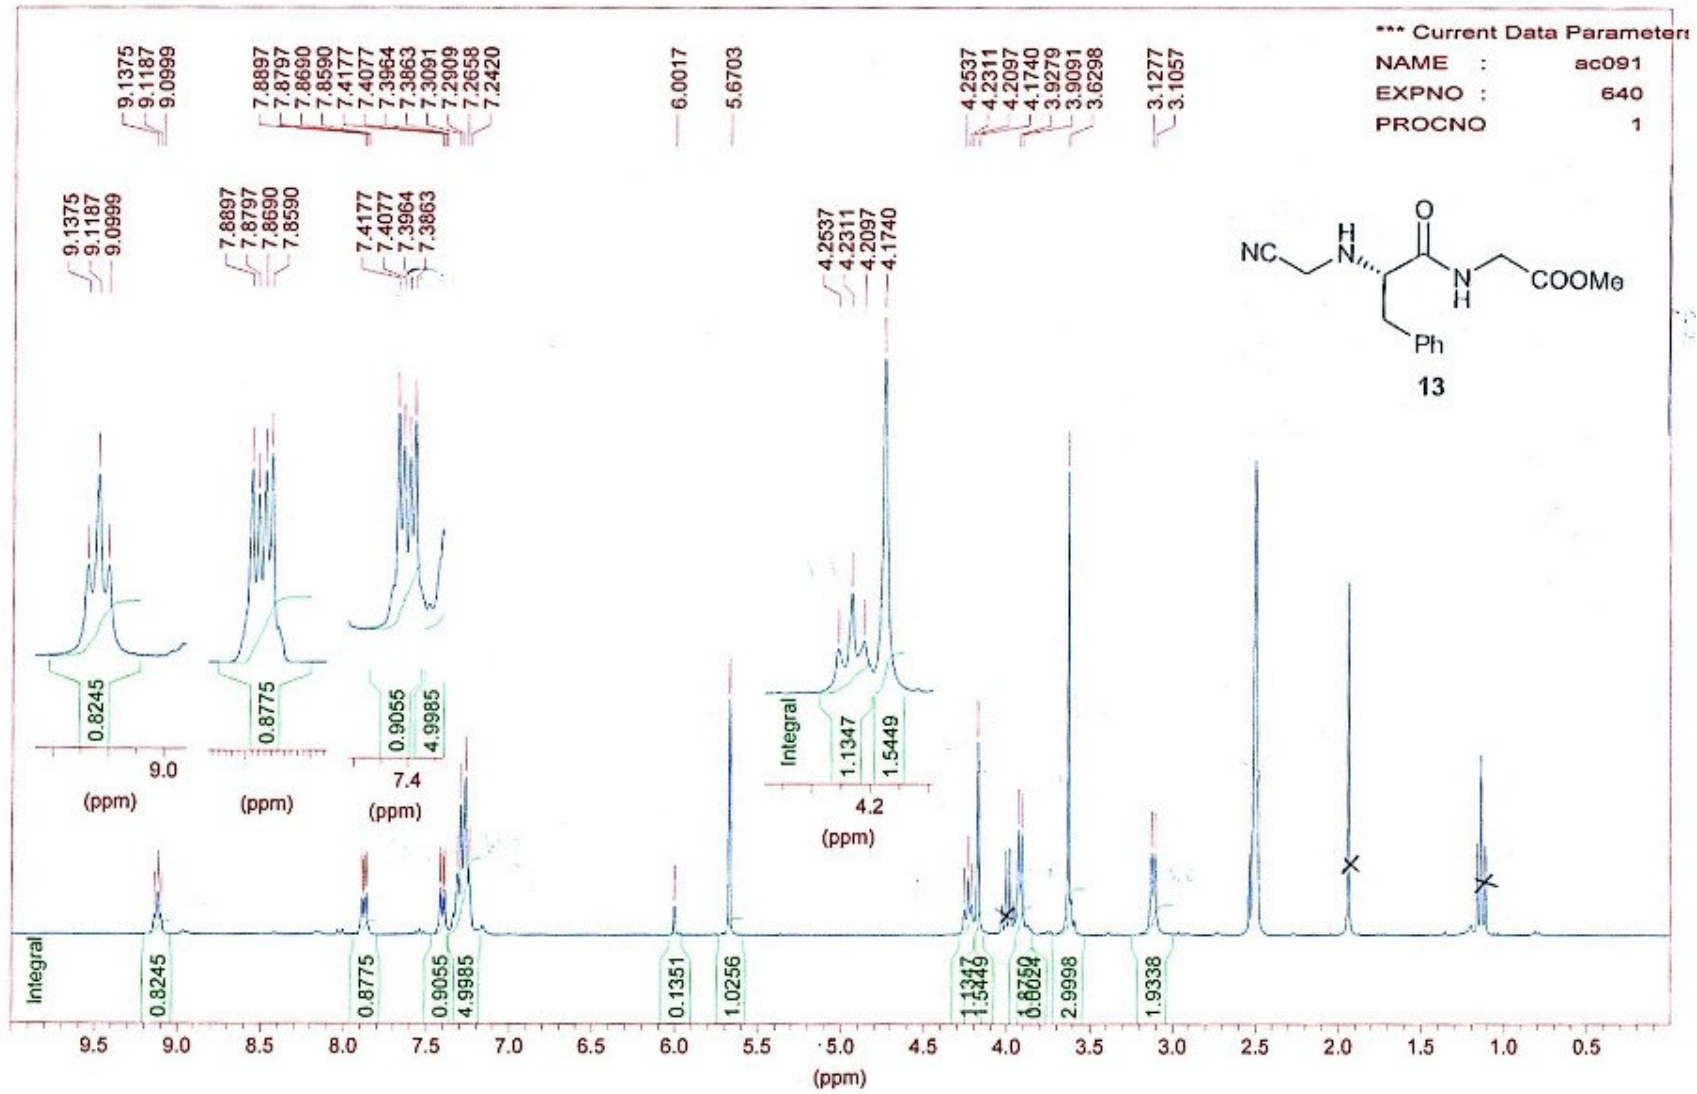

AC91 ds DMSO+TFA

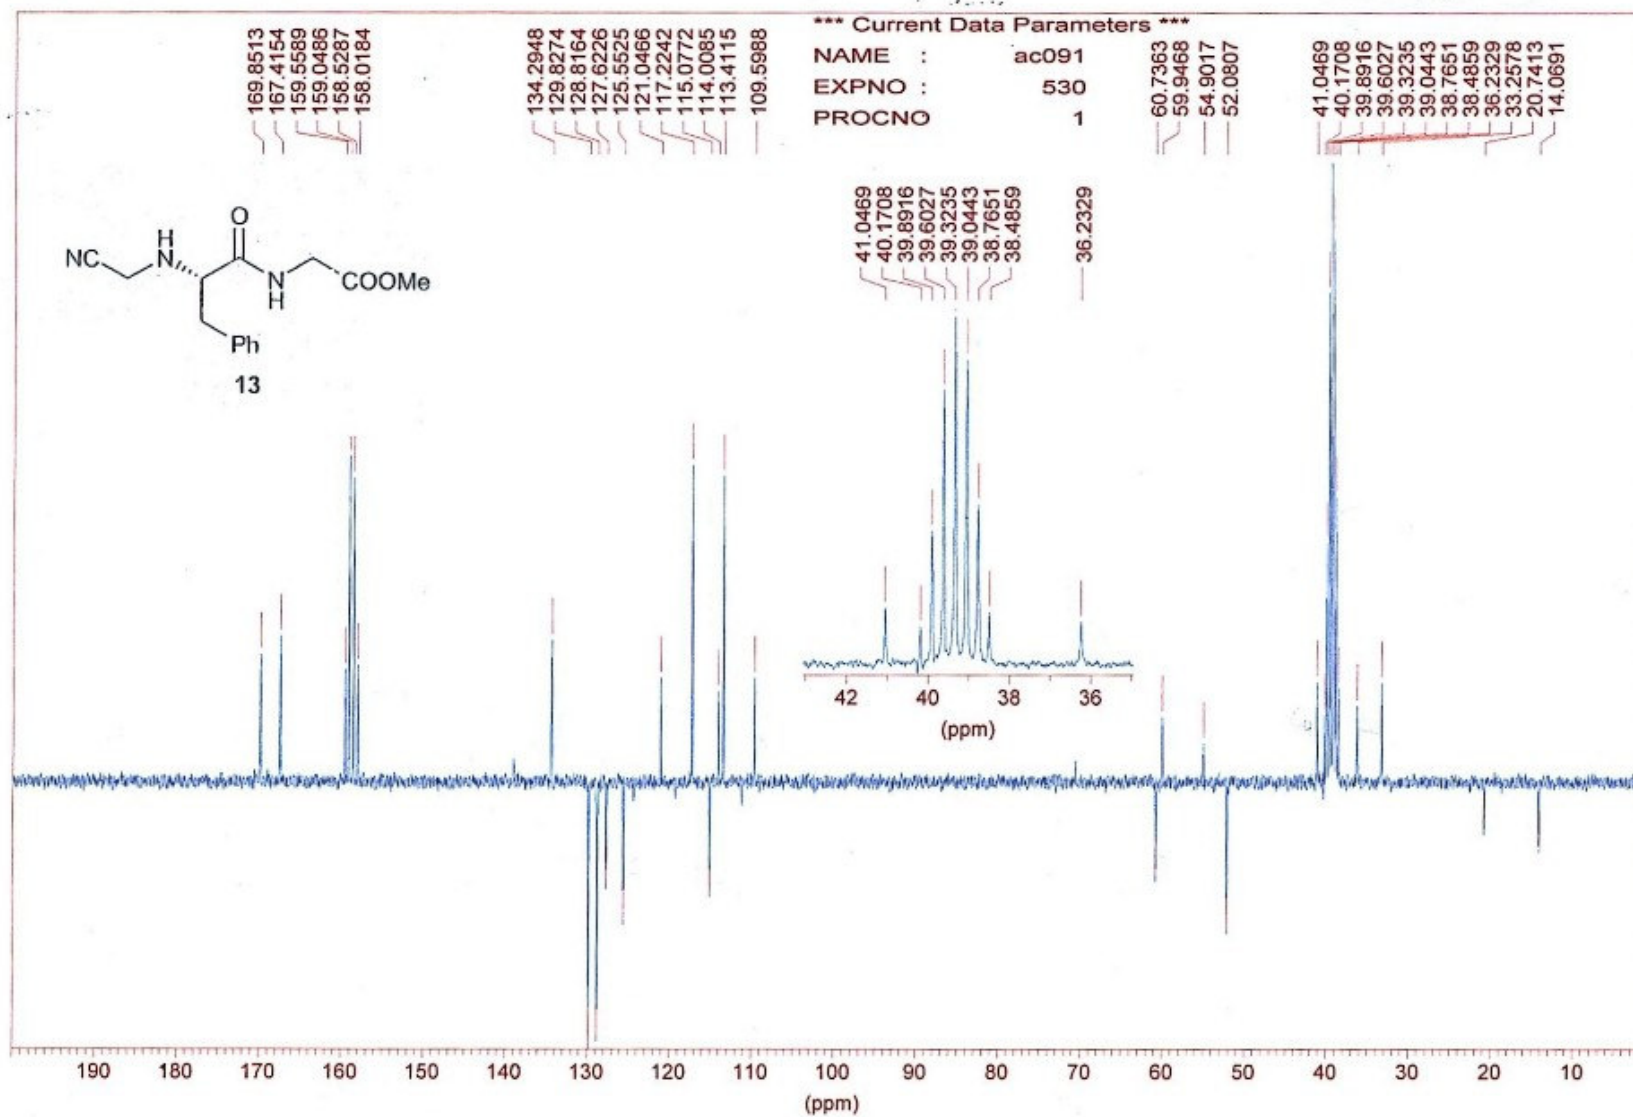

AC154A DMSO+TFAO

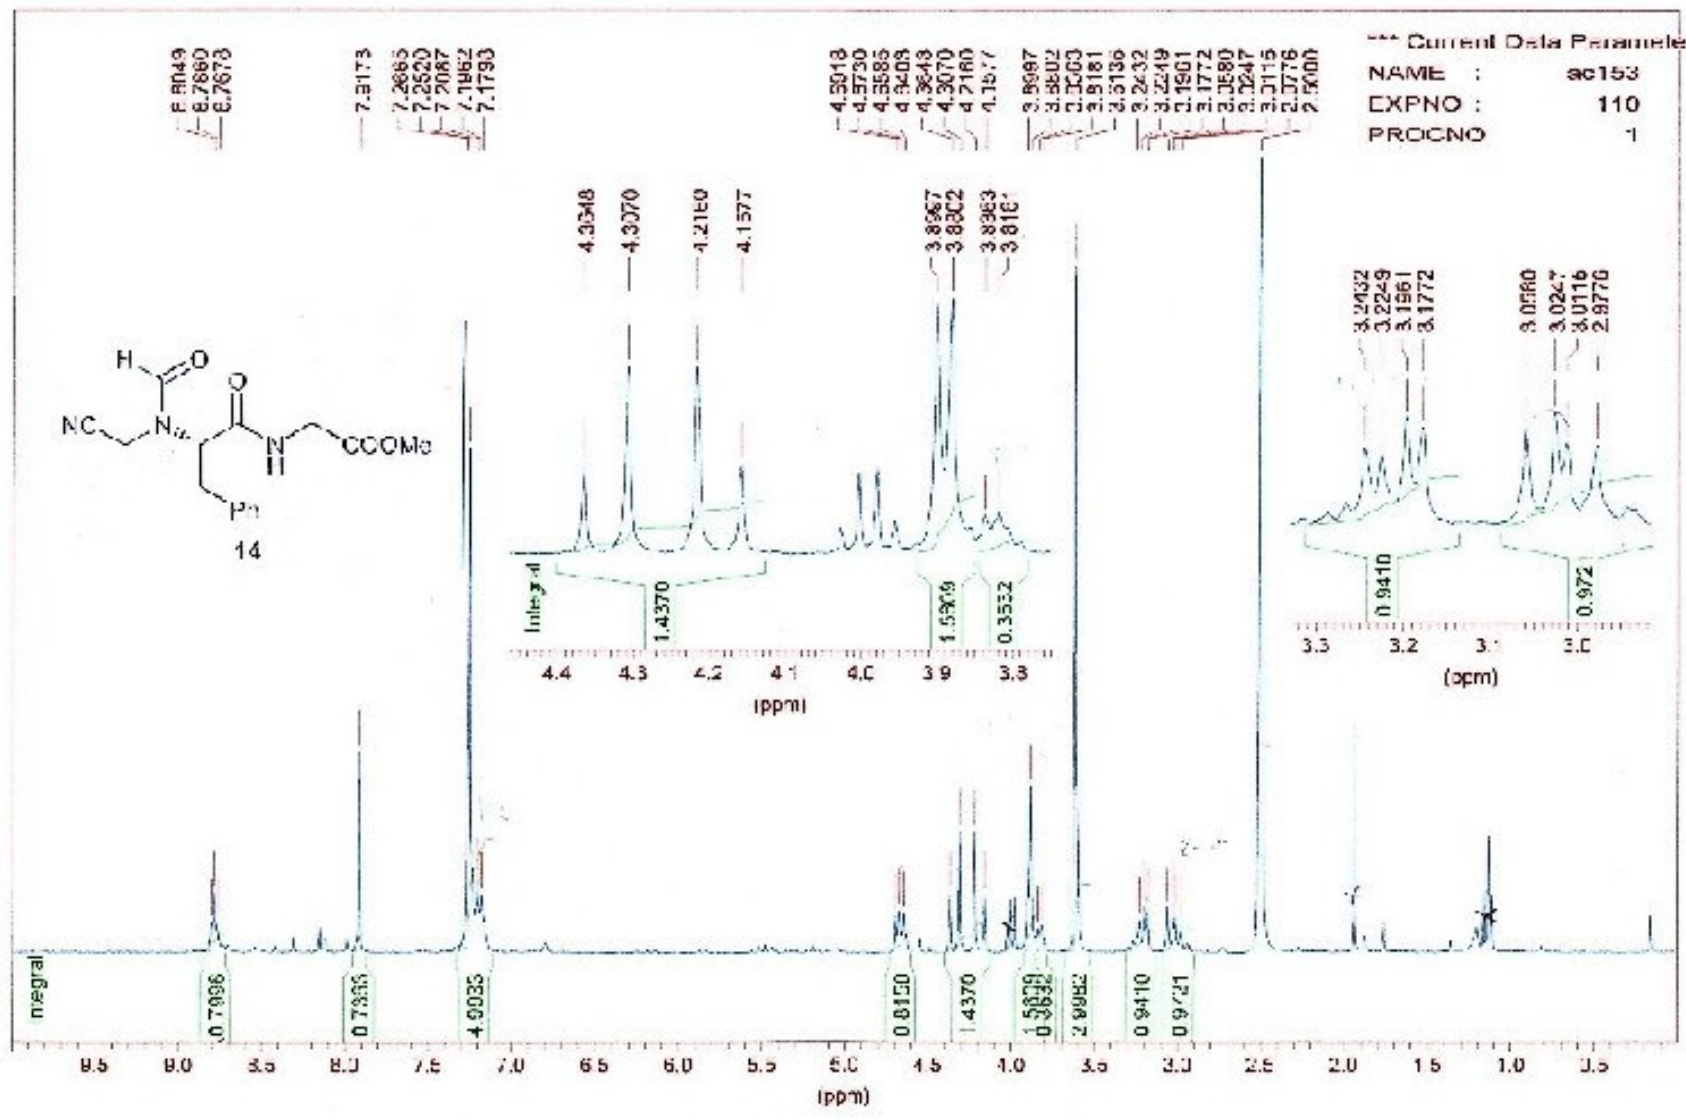

AC154A ds CDCI3

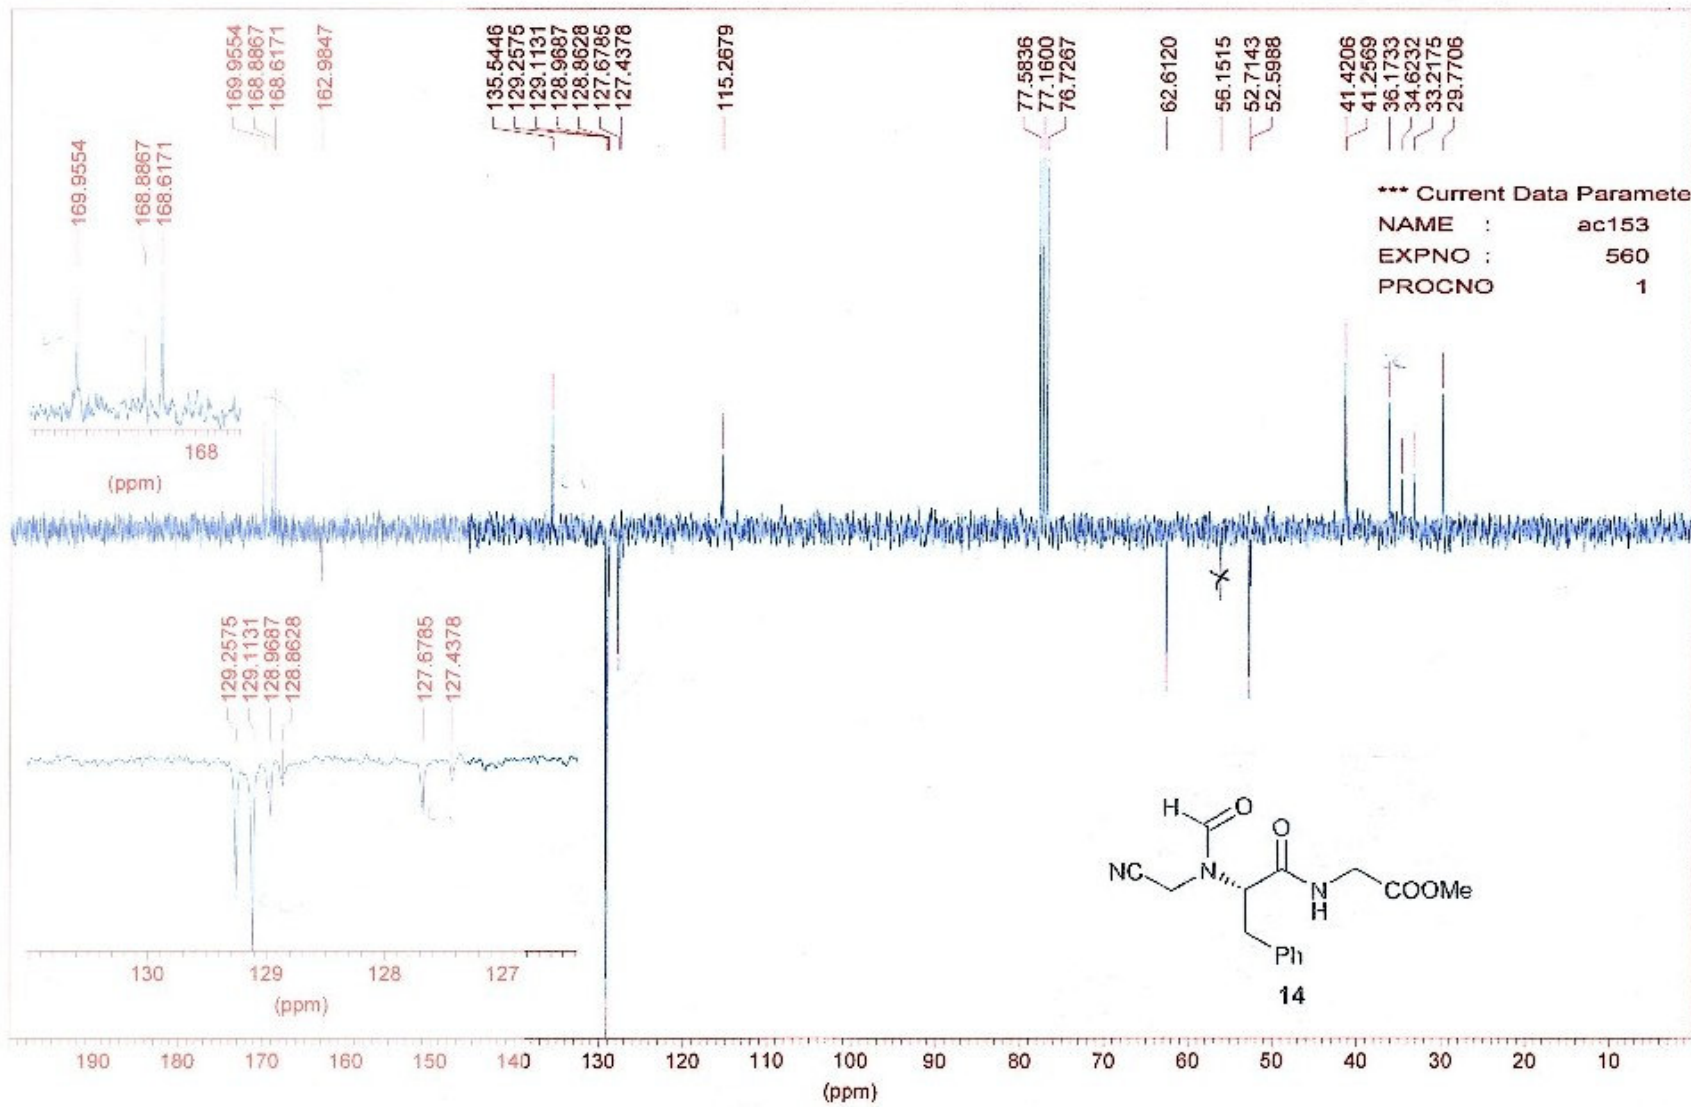







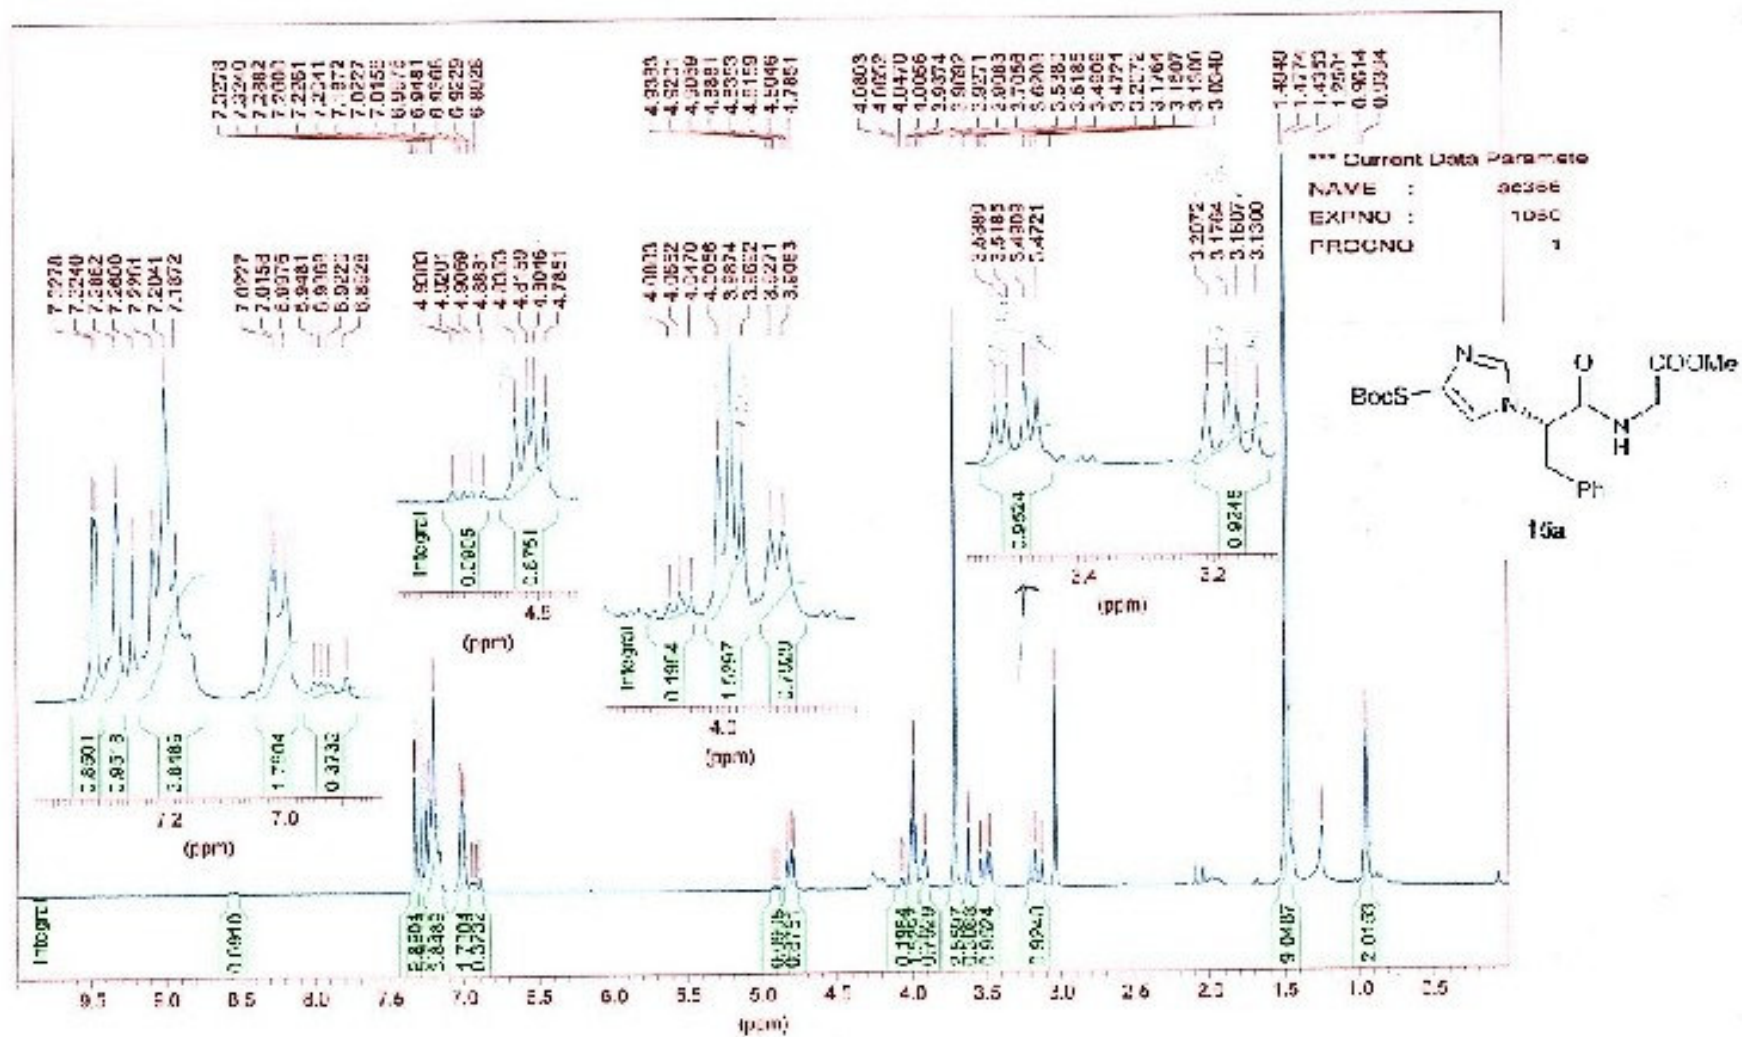

AC366

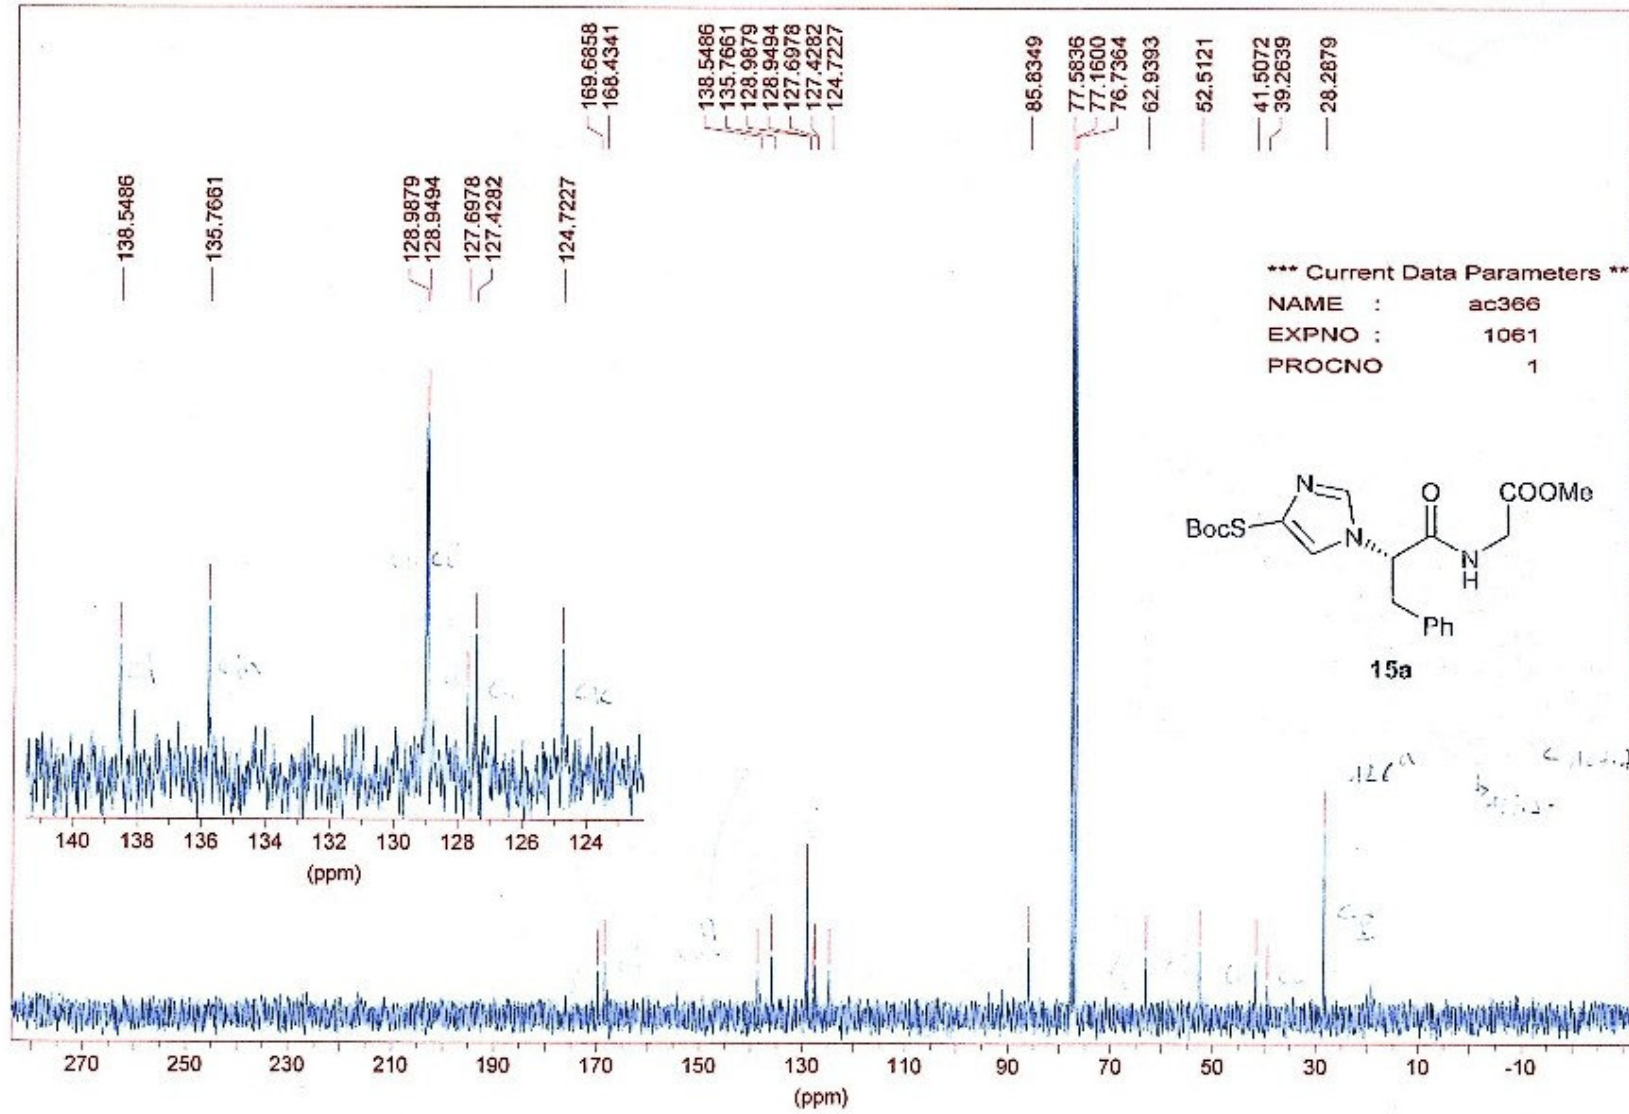

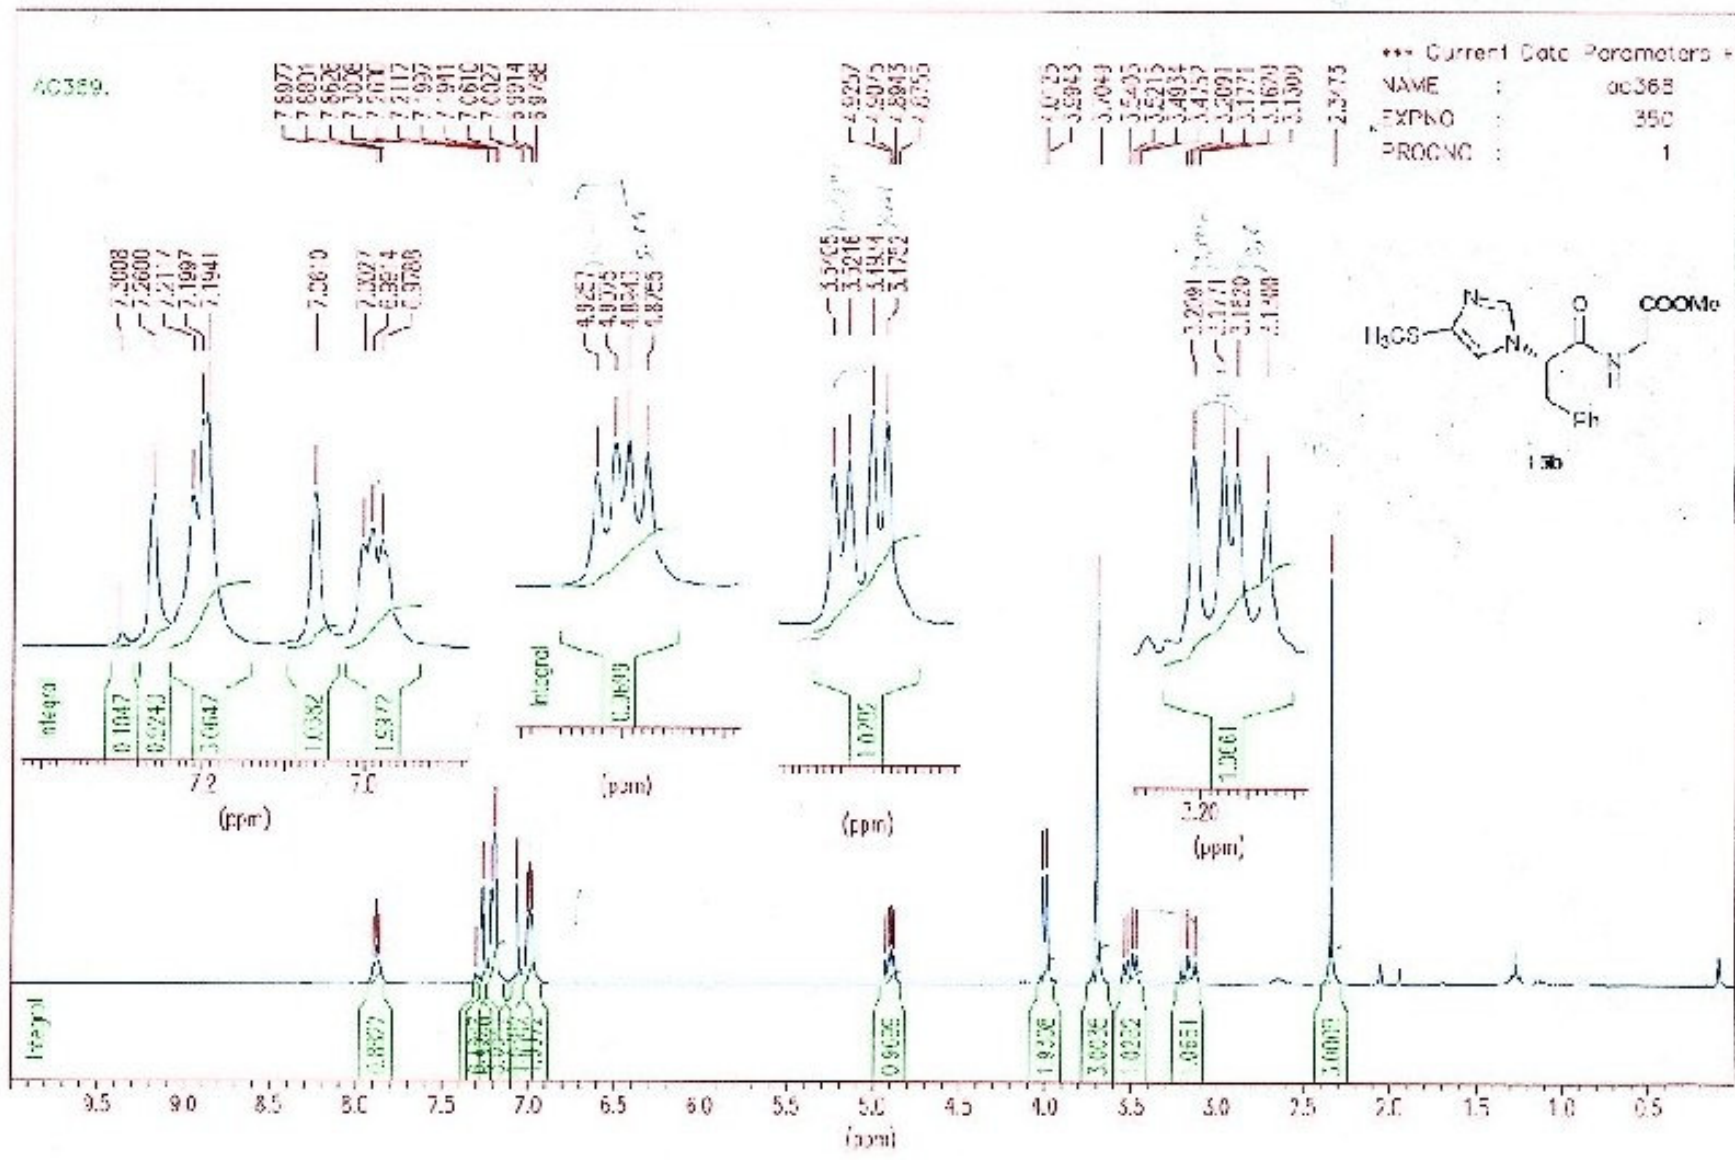

AC368.

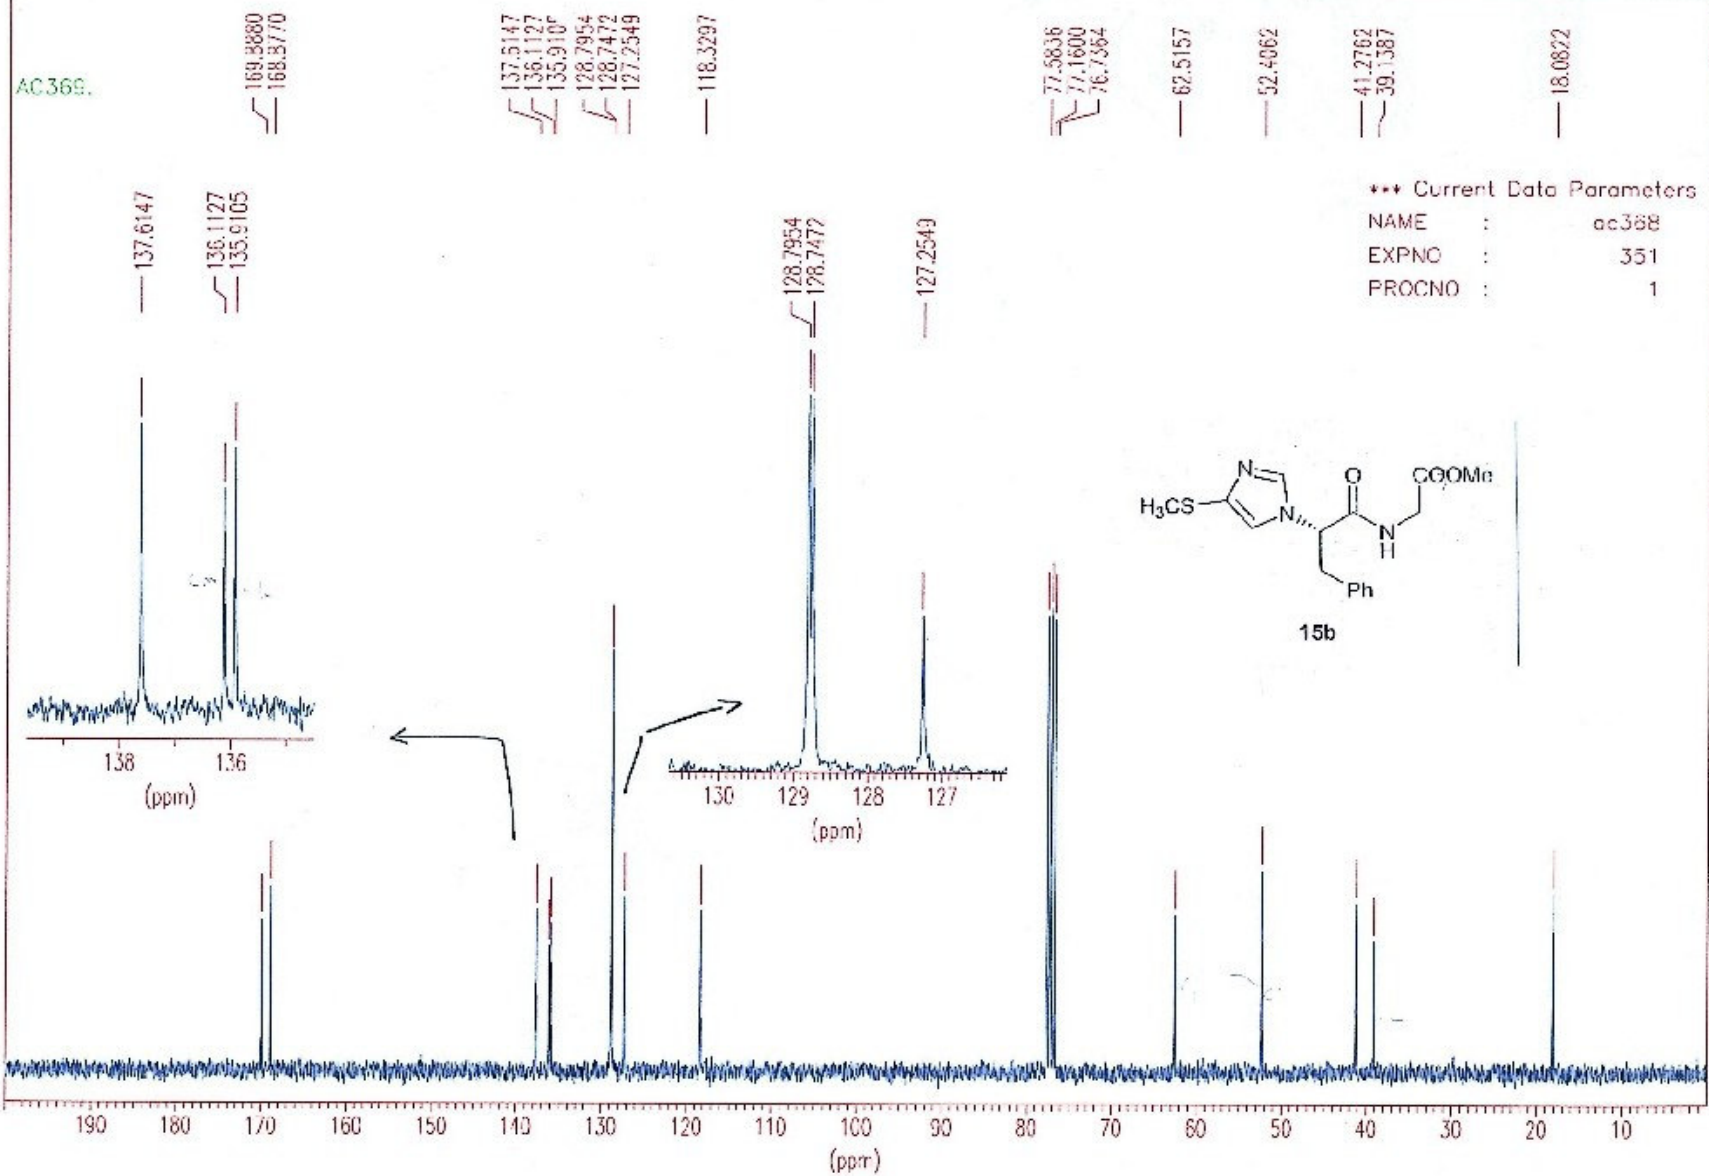

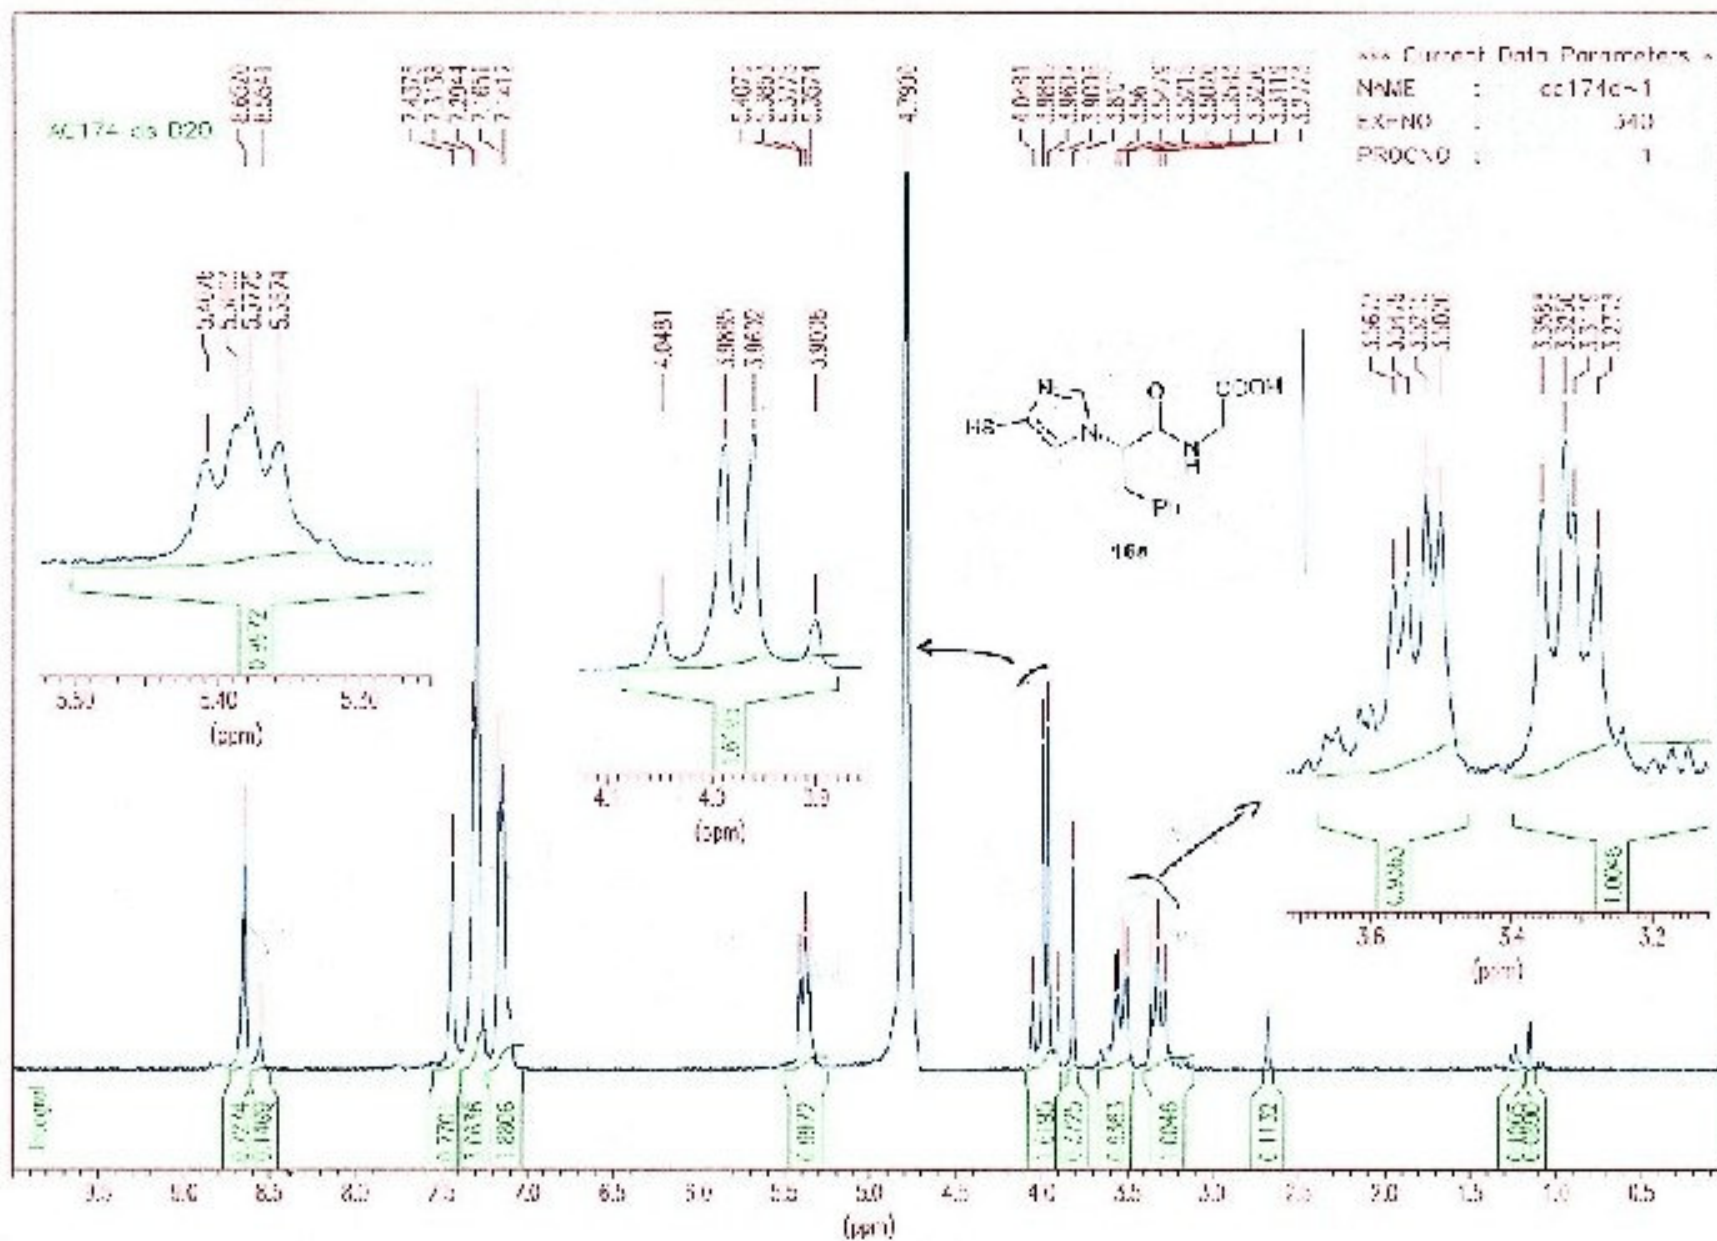

Supplement: b810678a.pdf [file b810678a.pdf]
